# Supplementary material for: A genome-wide approach for detecting novel insertion-deletion variants of mid-range size
Source: PubMed Central journal article supplement — Nucleic Acids Res. 2016 Jun 20;44(15):e126. doi: 10.1093/nar/gkw481 (PMC5009736; doi:10.1093/nar/gkw481), 2016-06-20

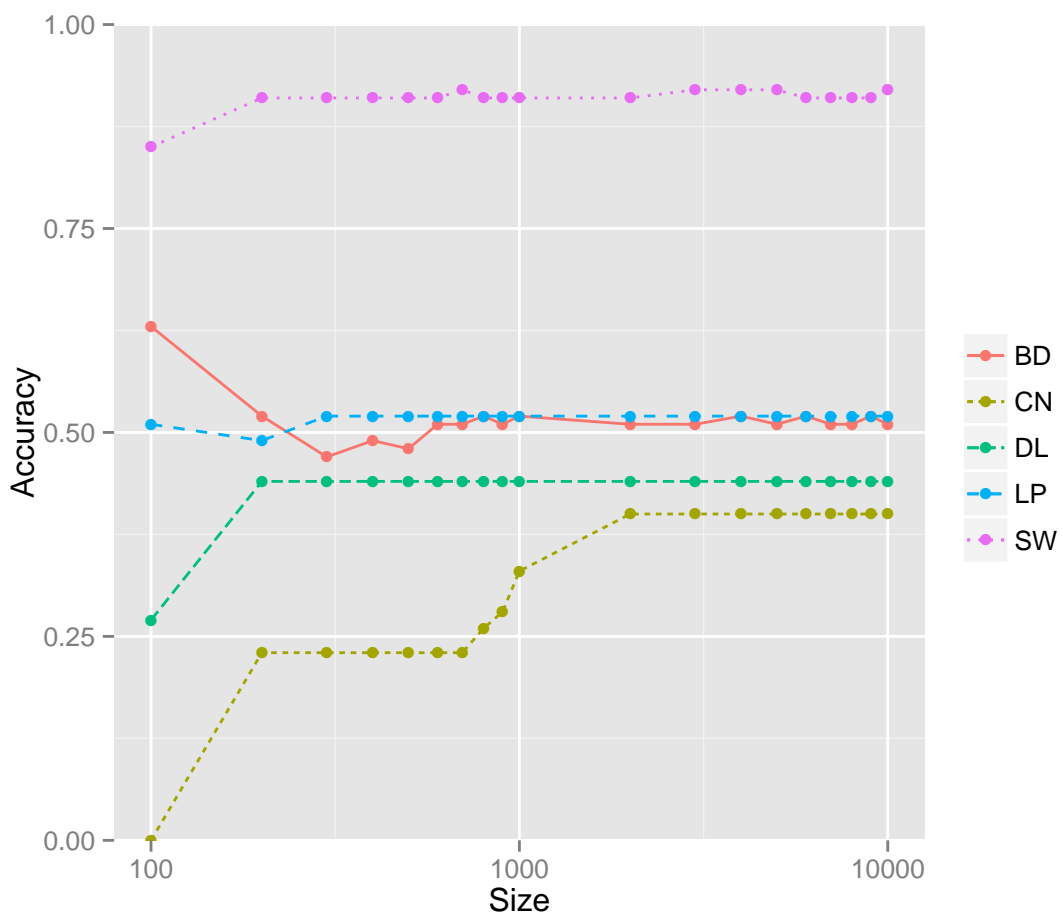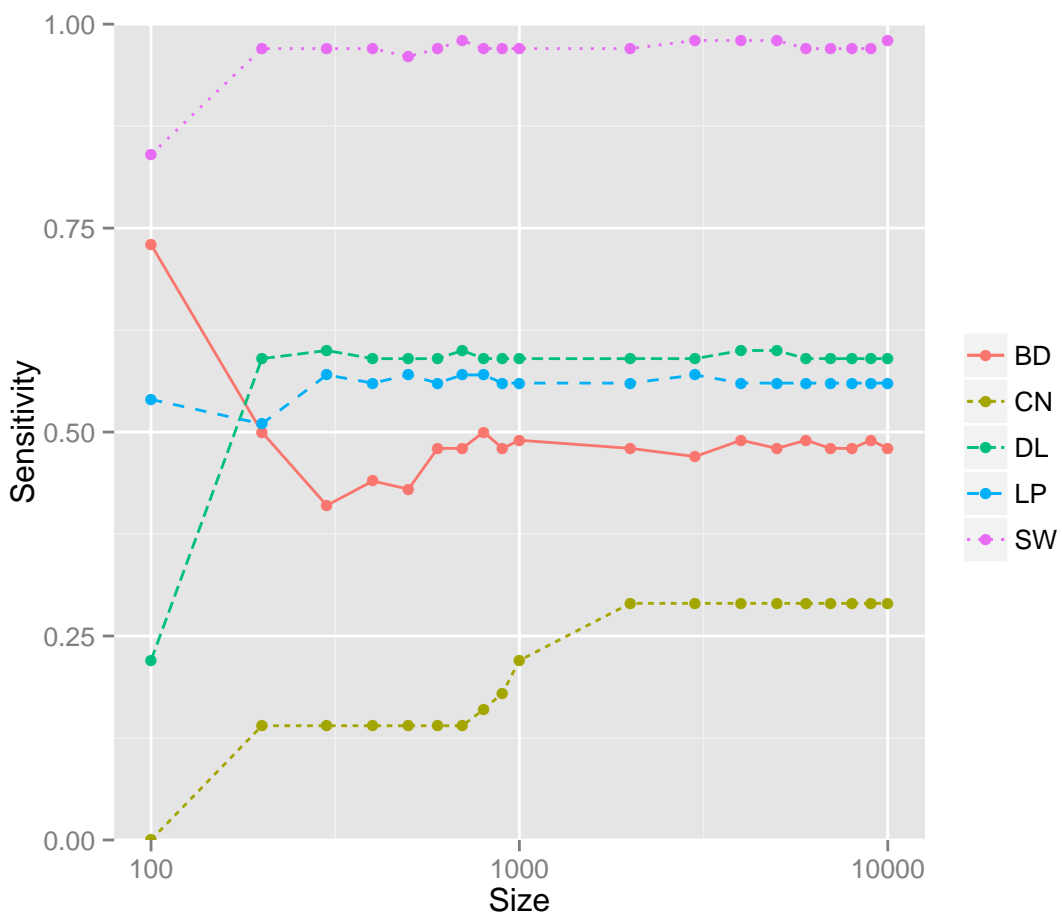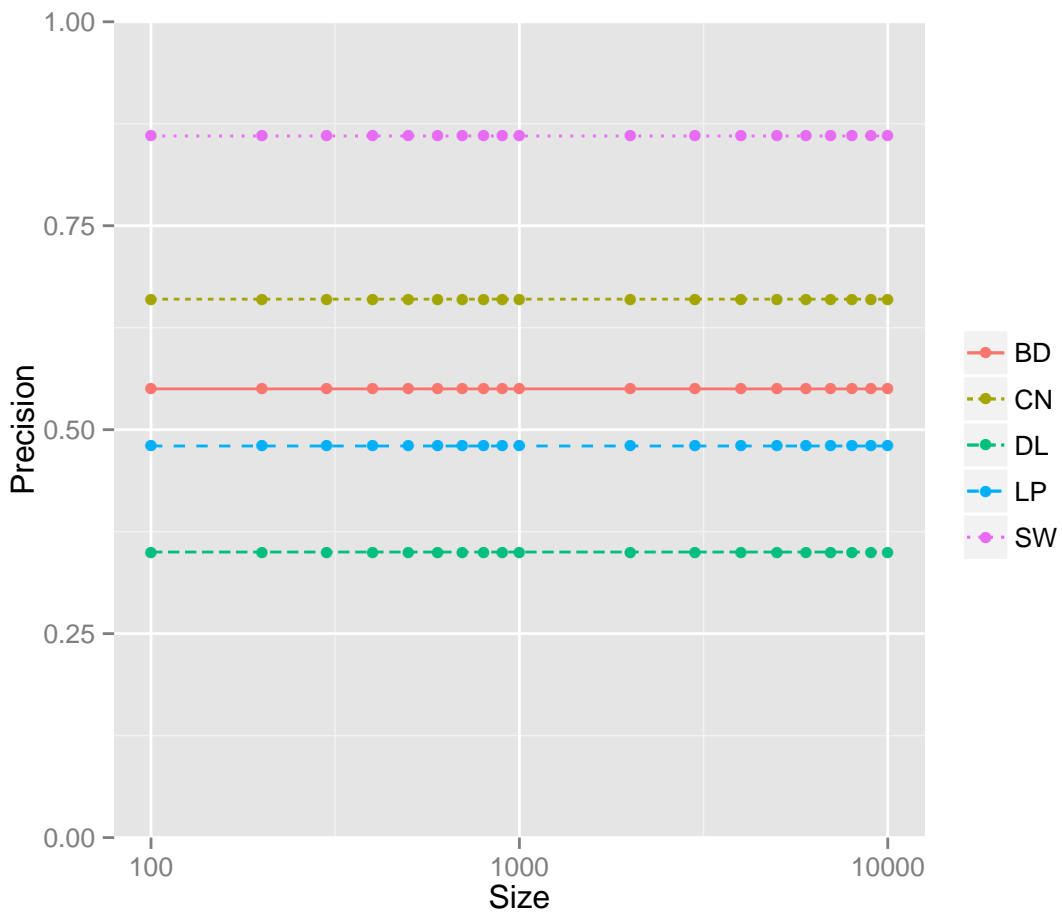

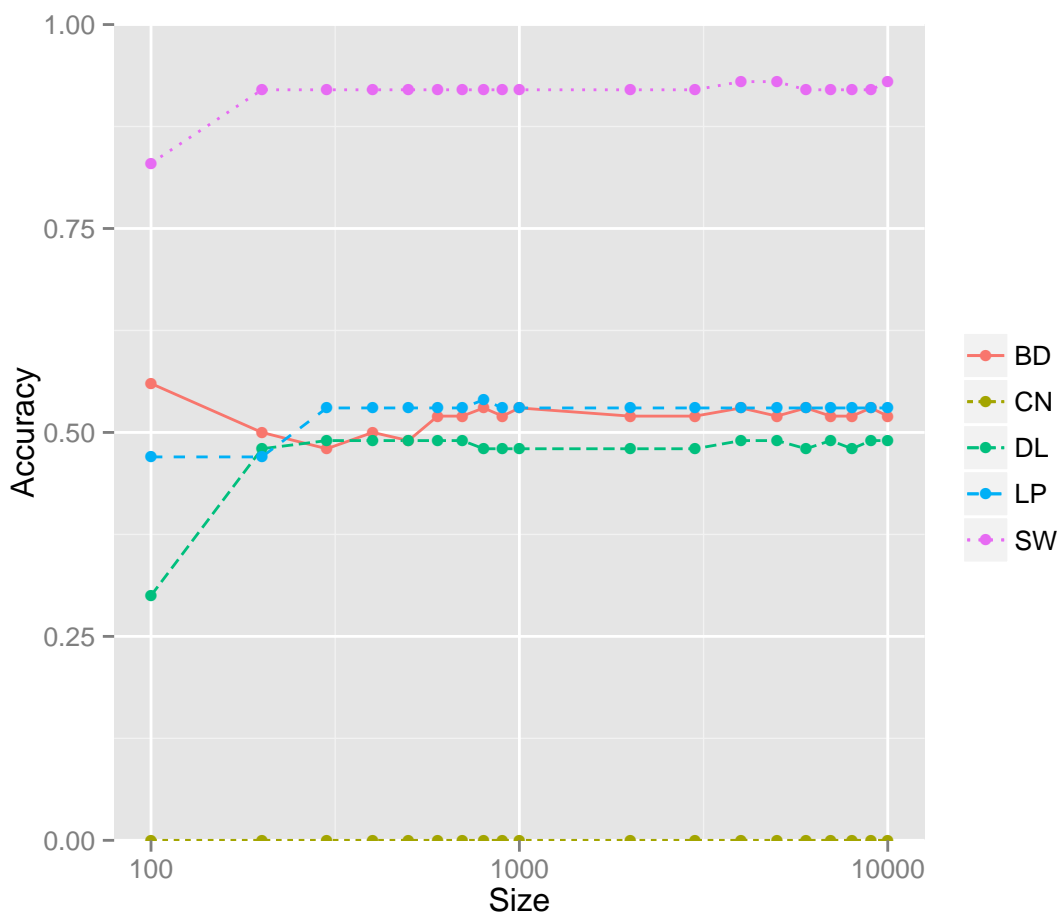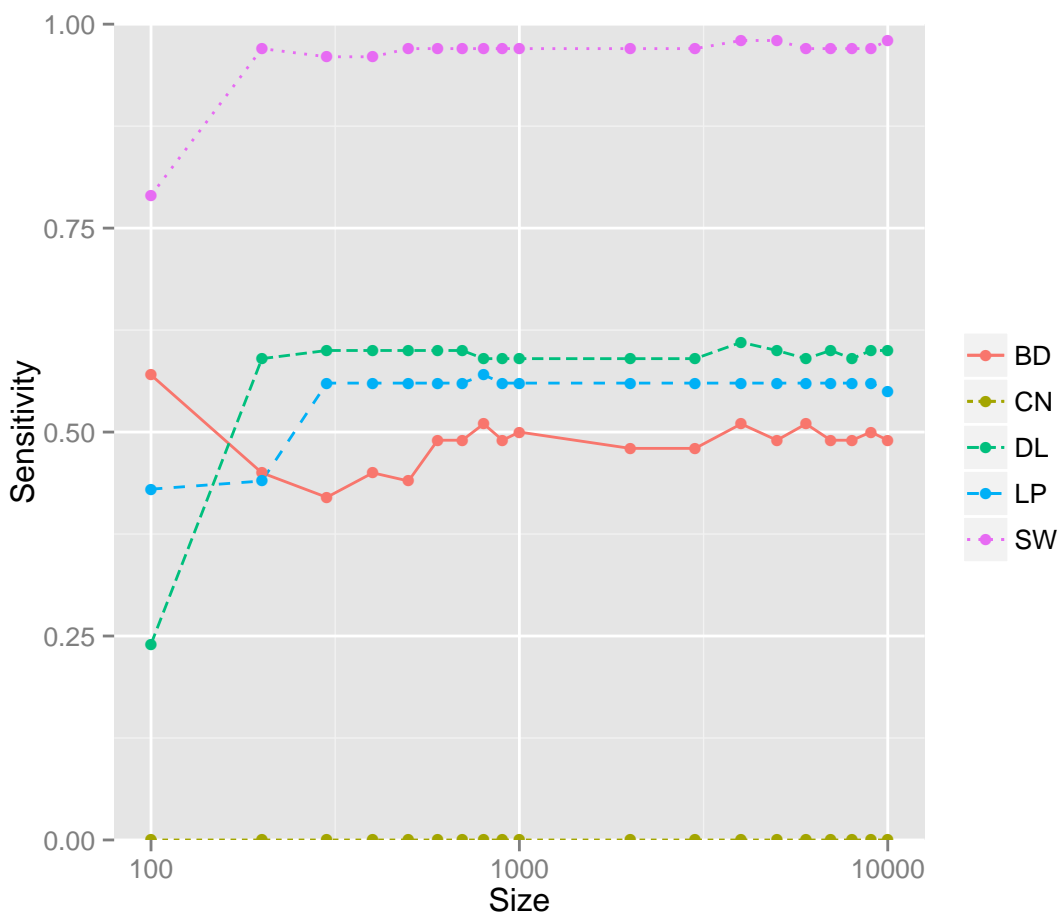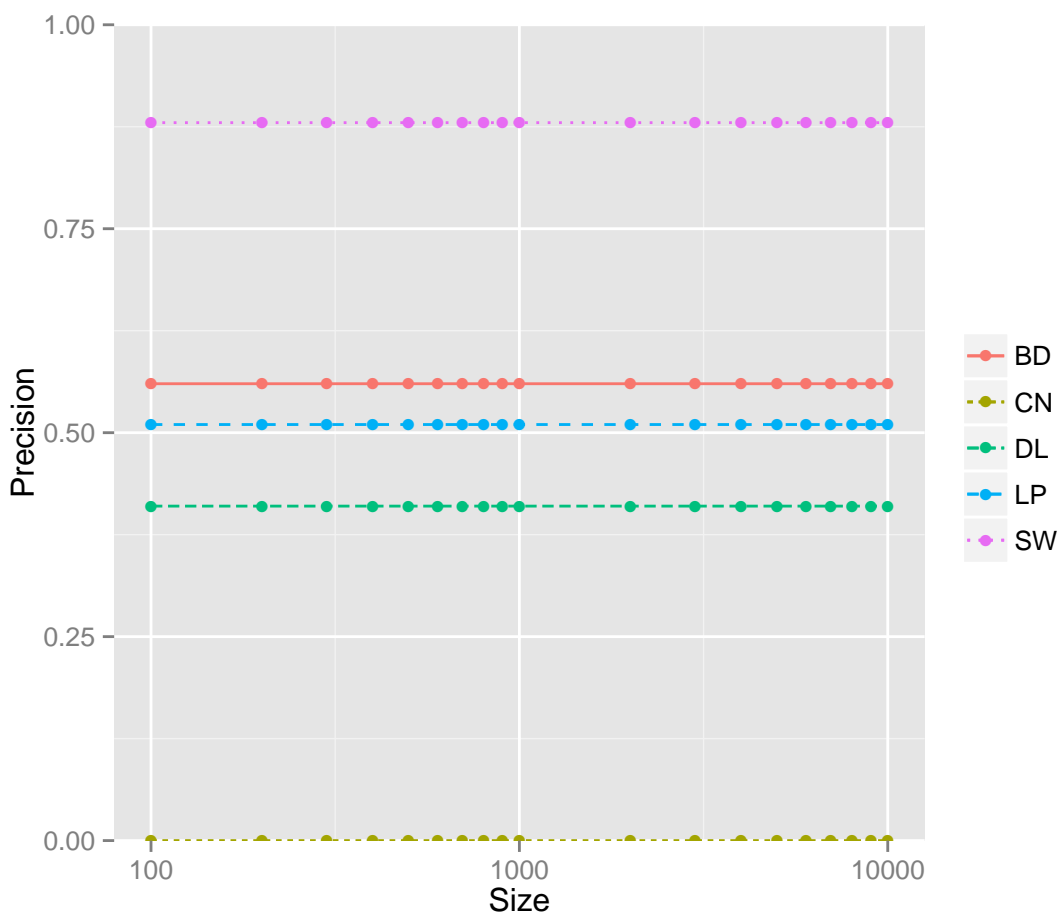

hosize.del:Sensitivity for del in homozygous settings

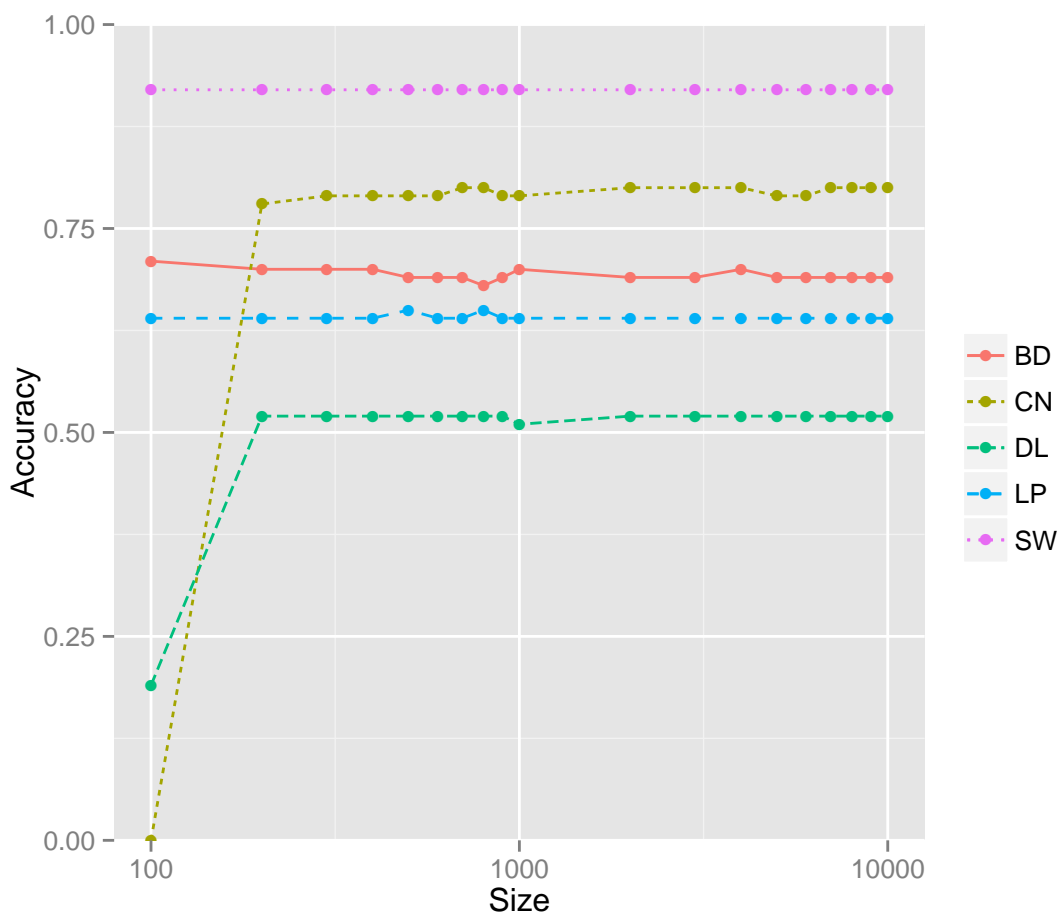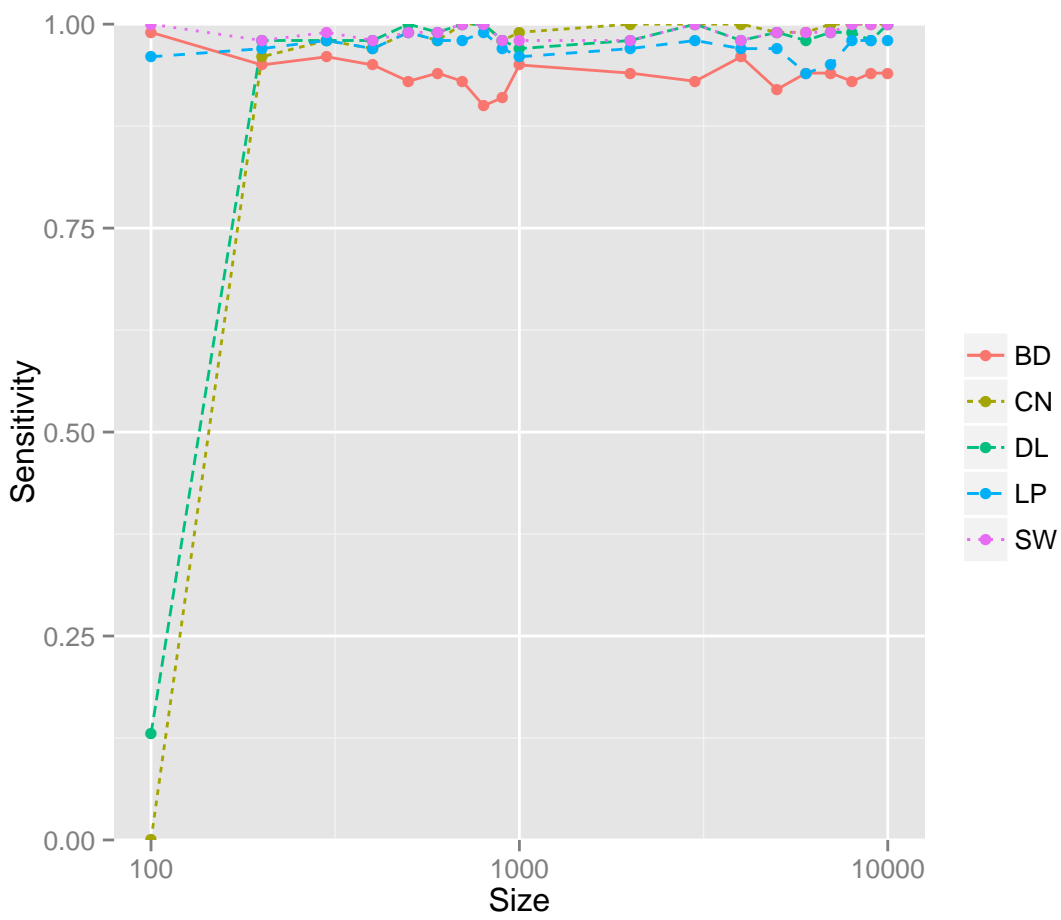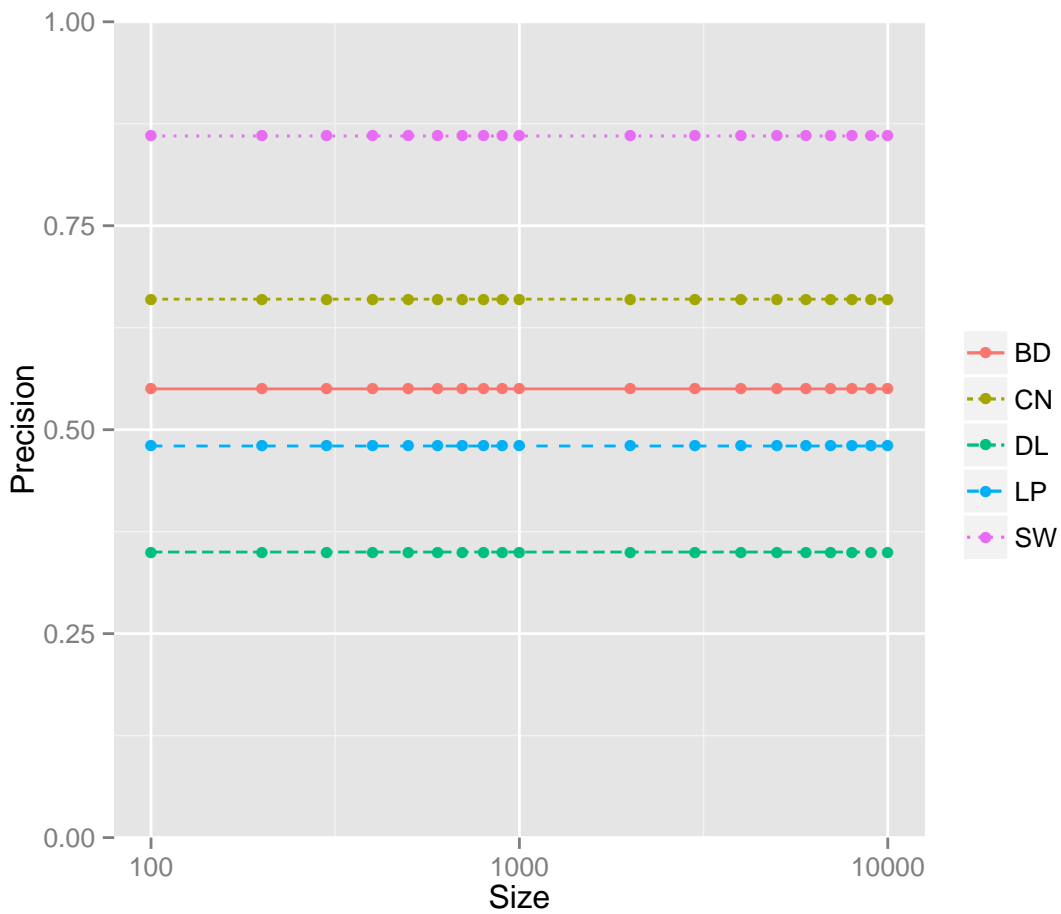

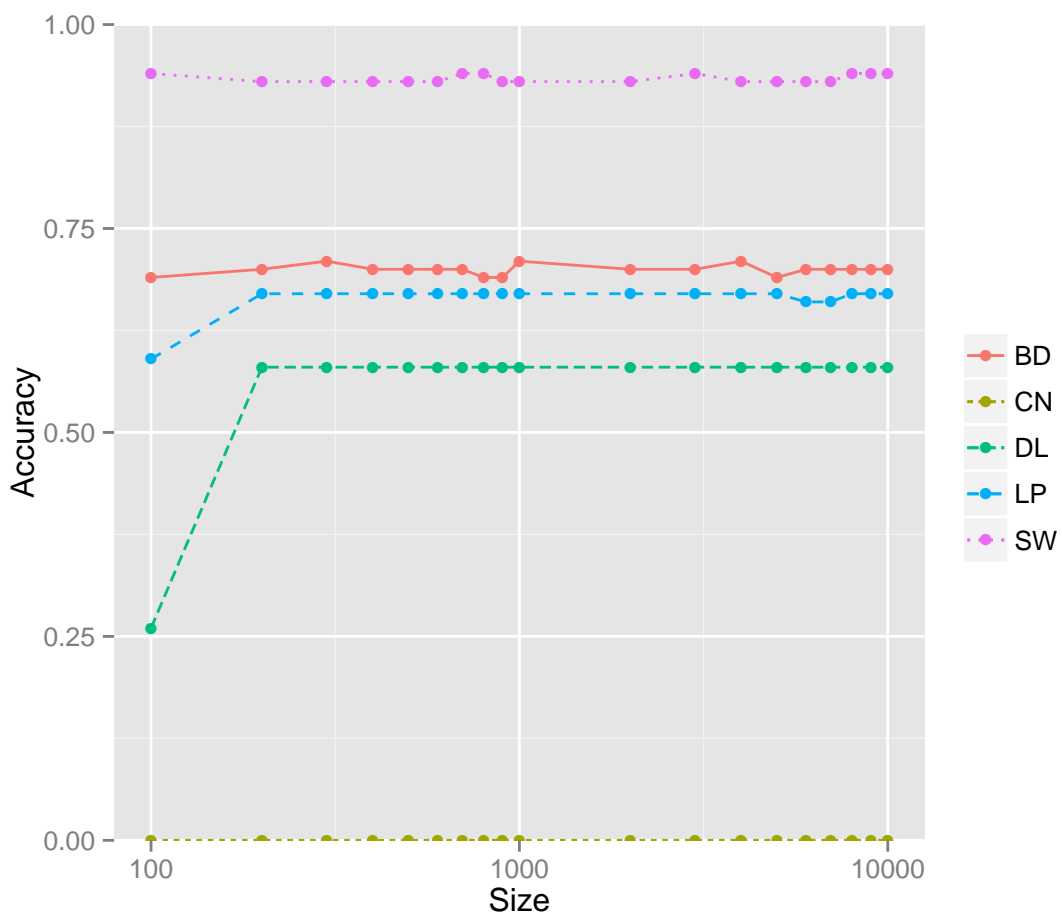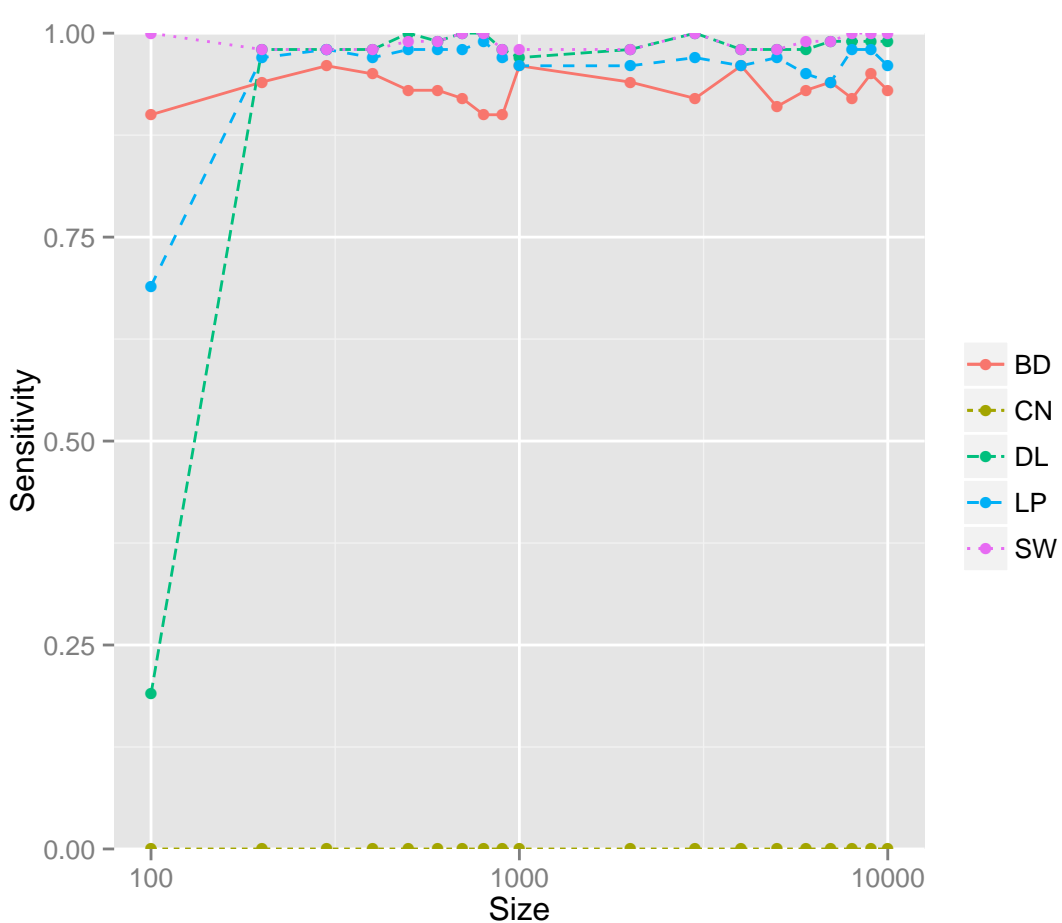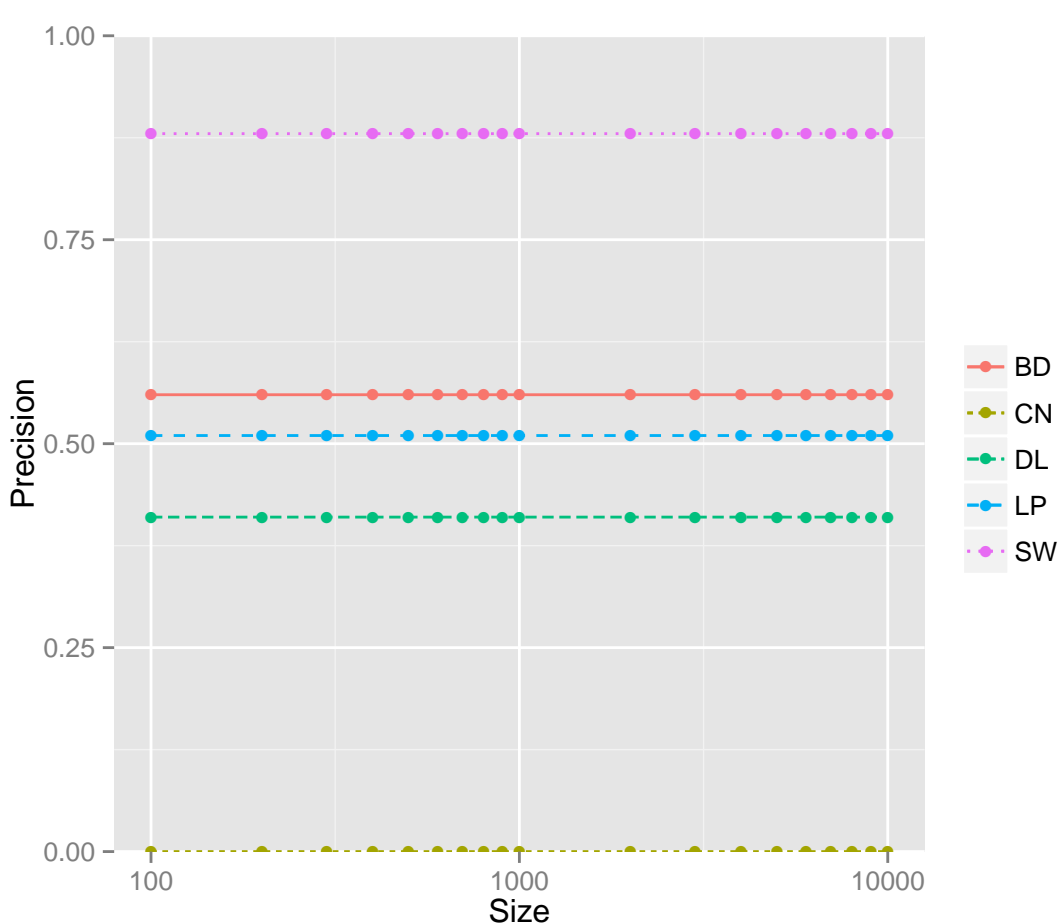

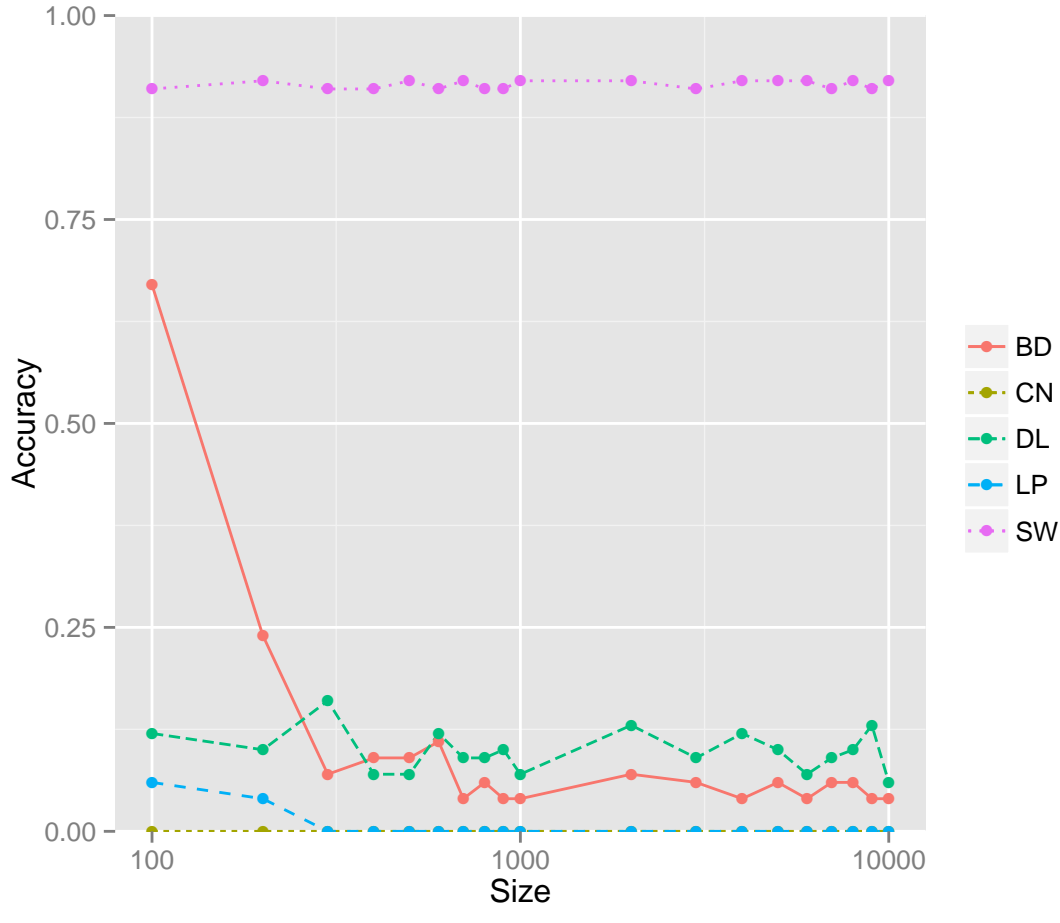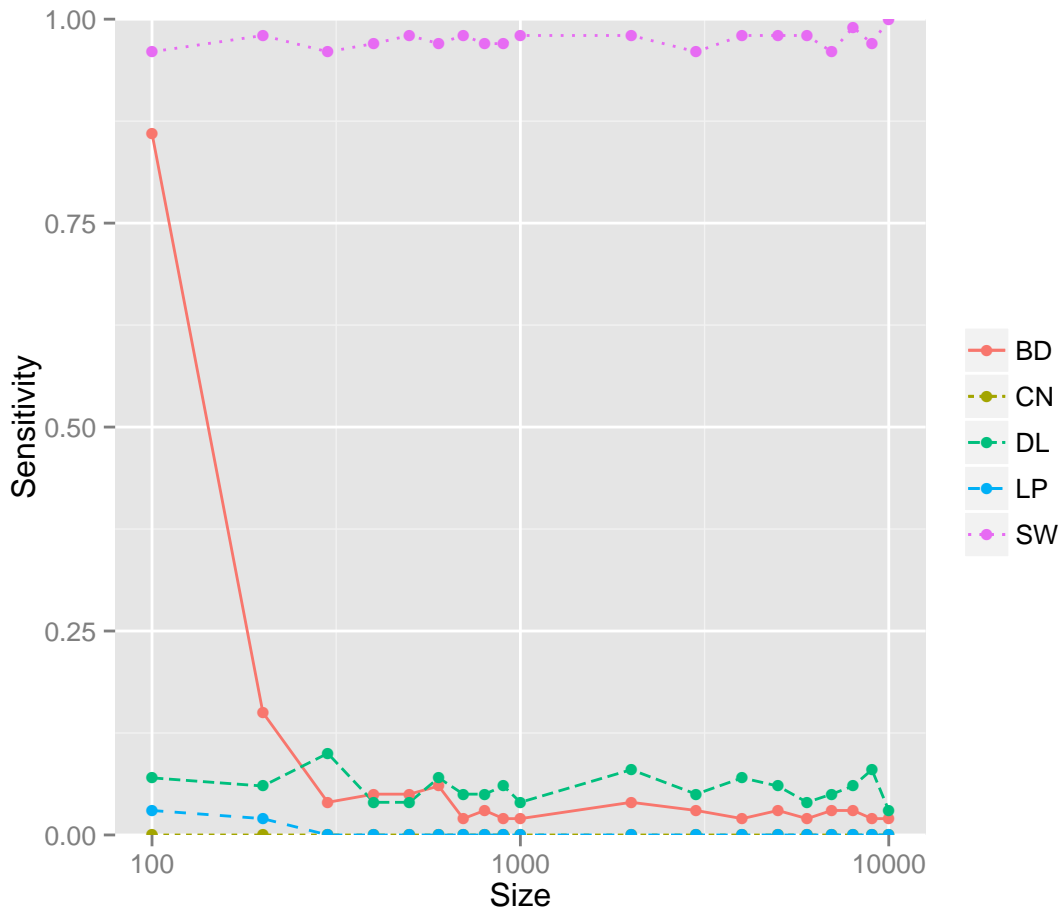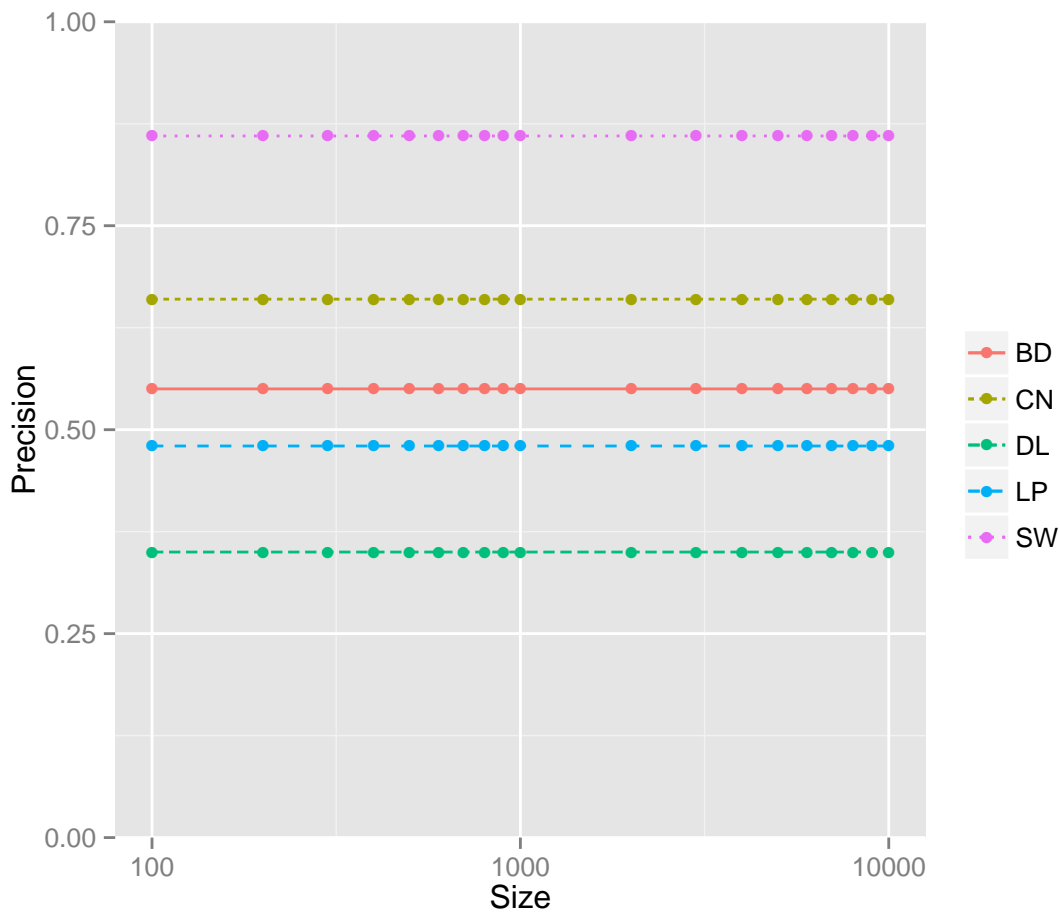

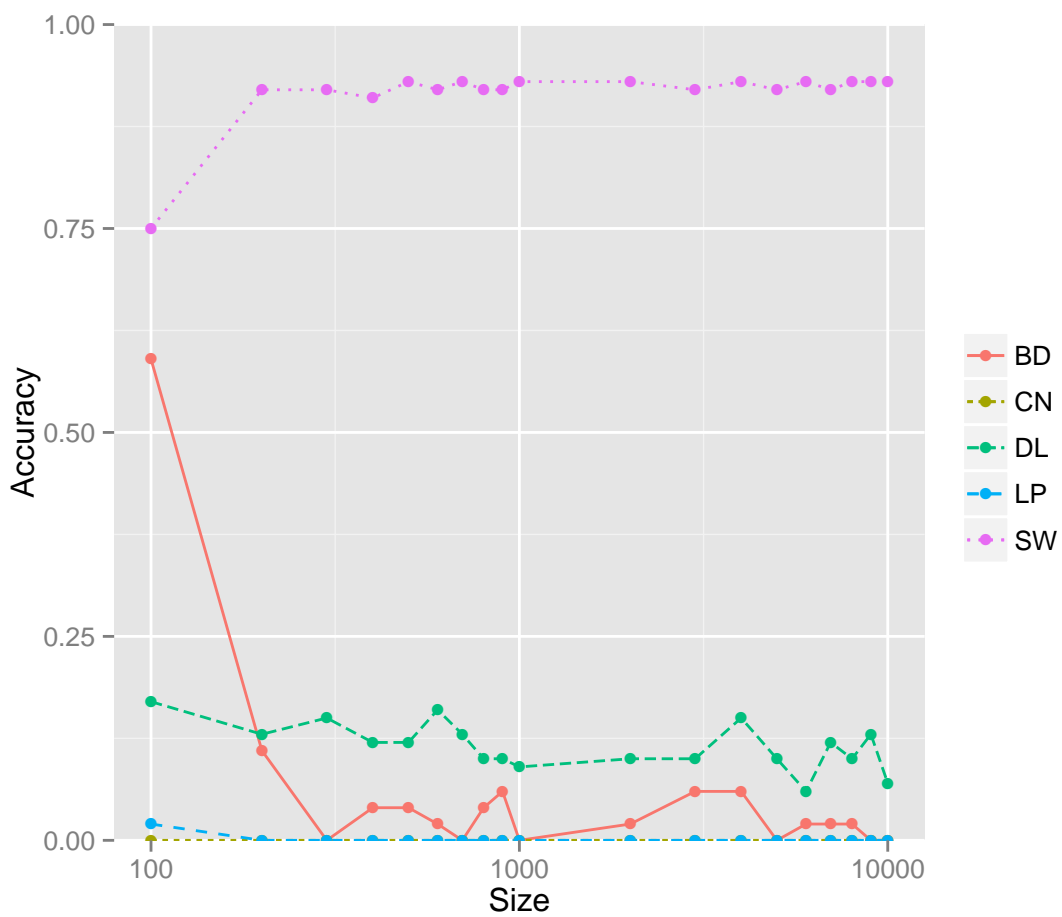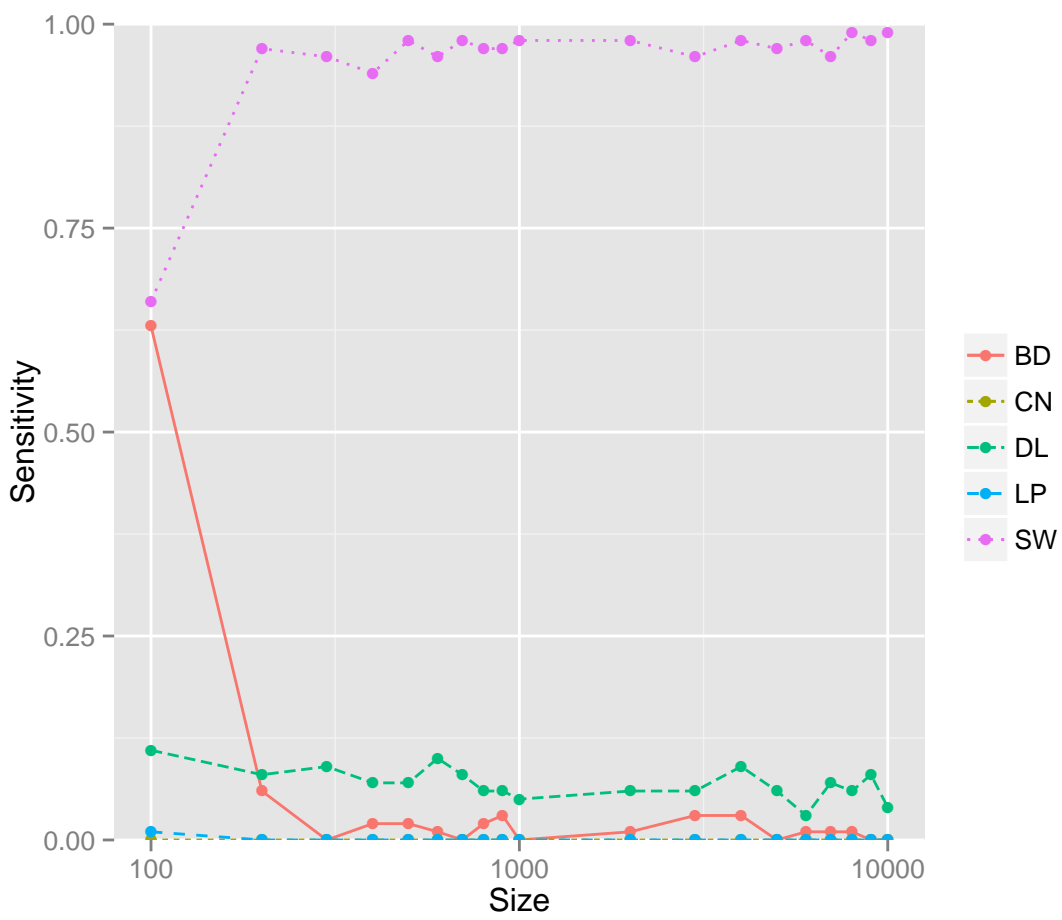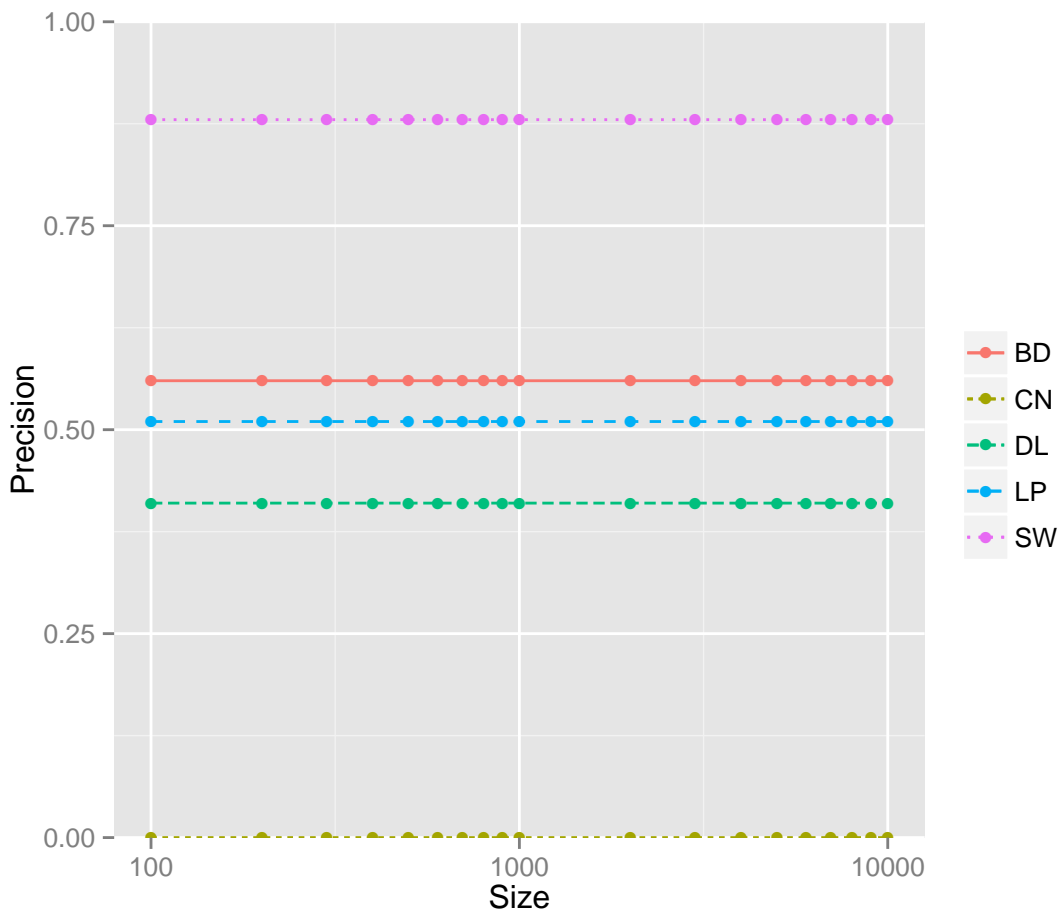

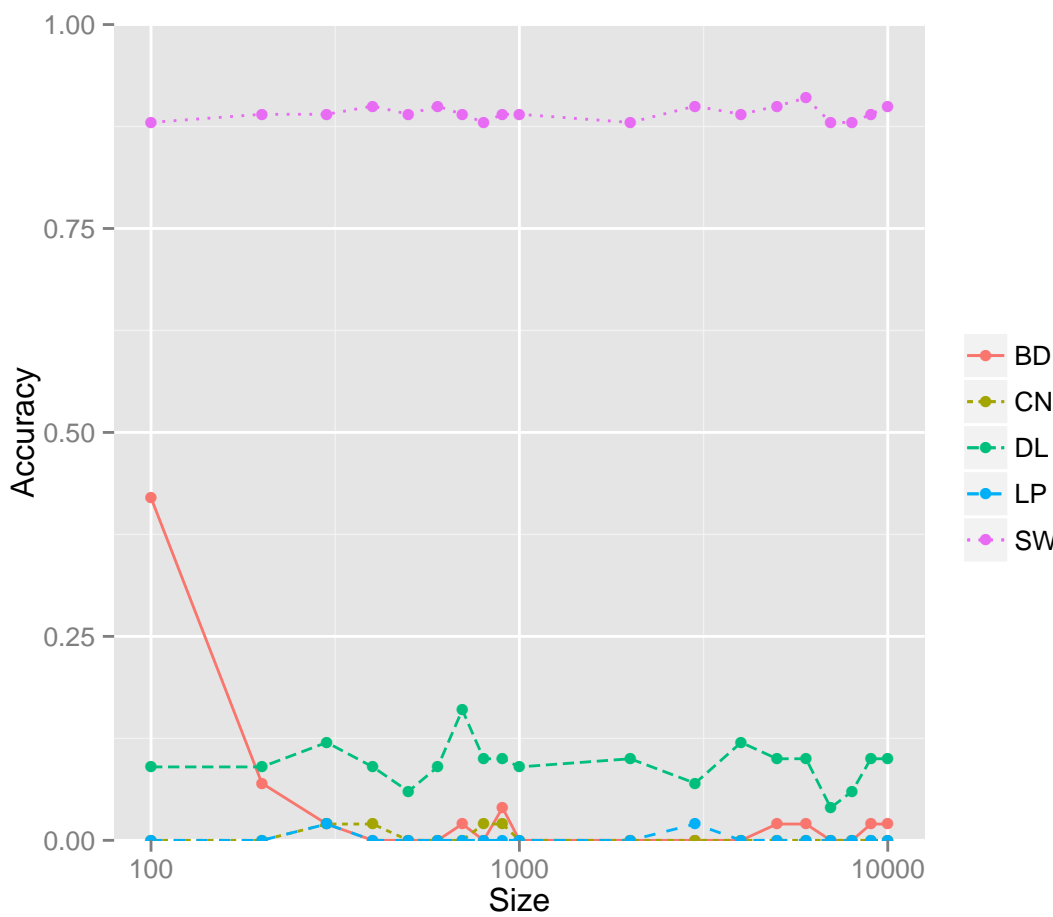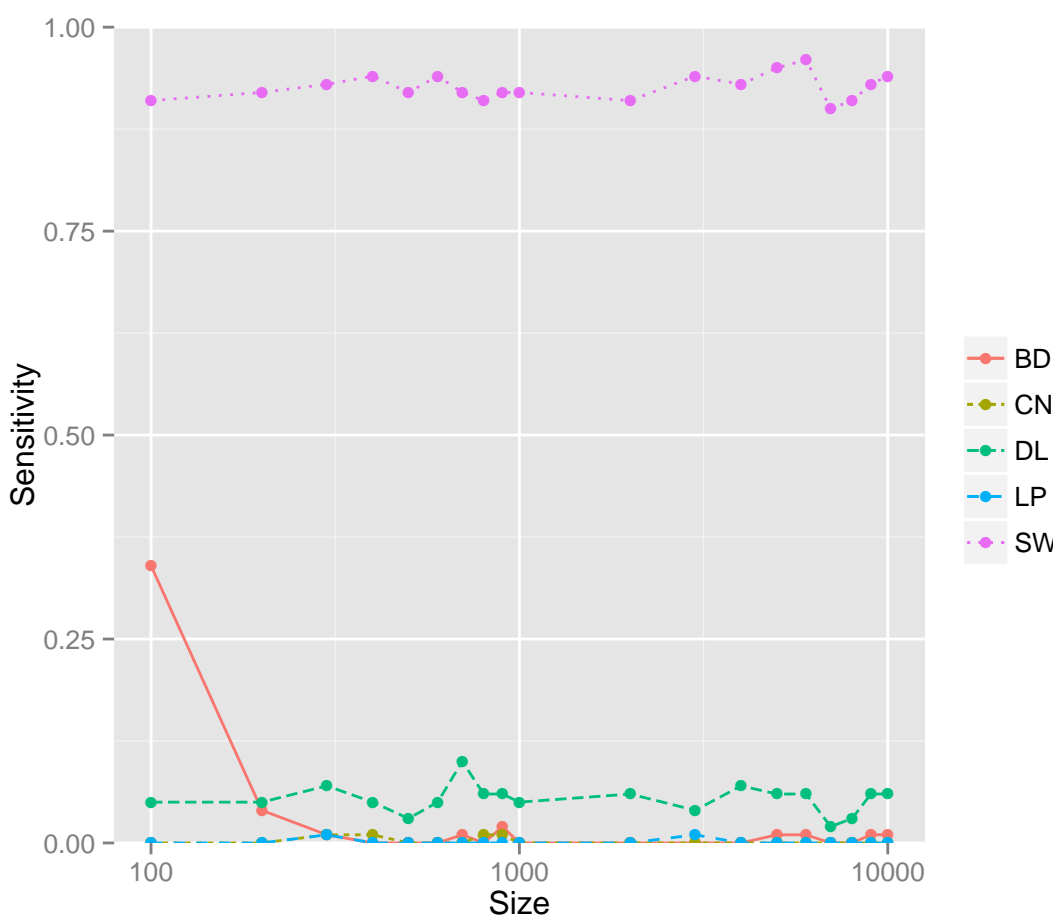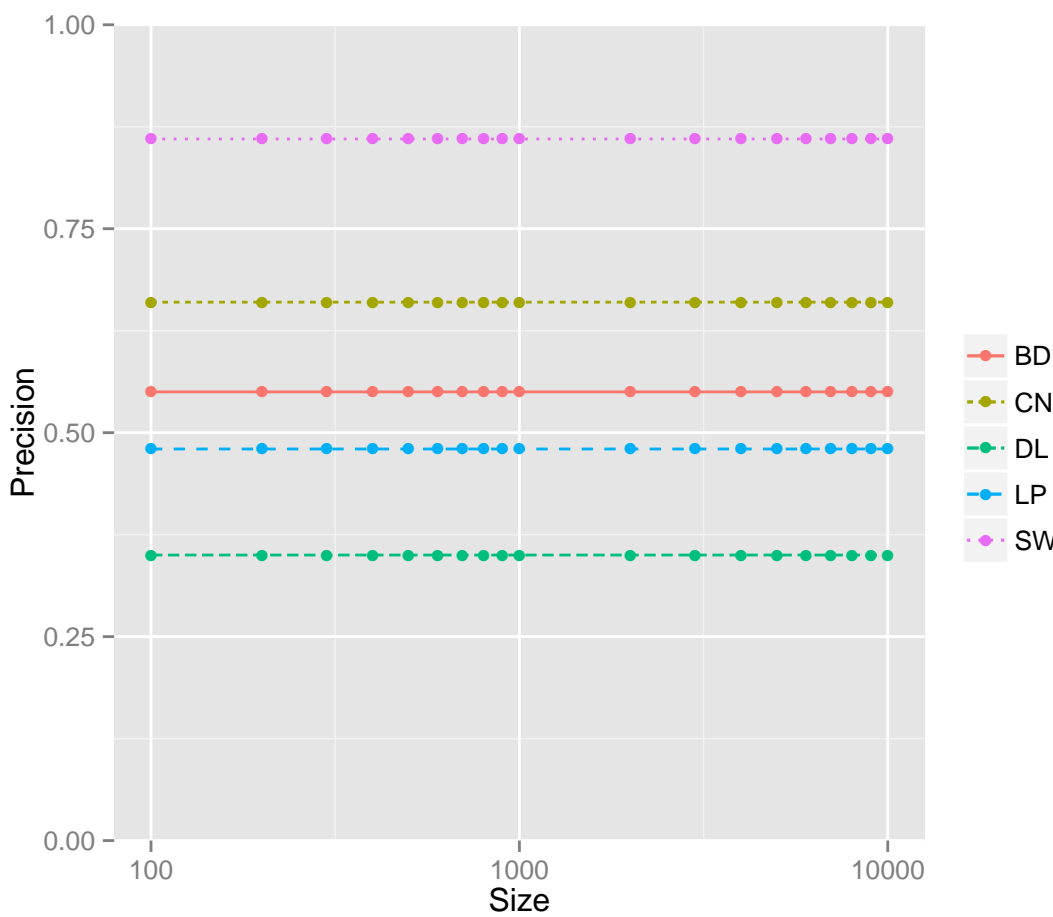

hesize.din: Sensitivity for din in heterozygous settings

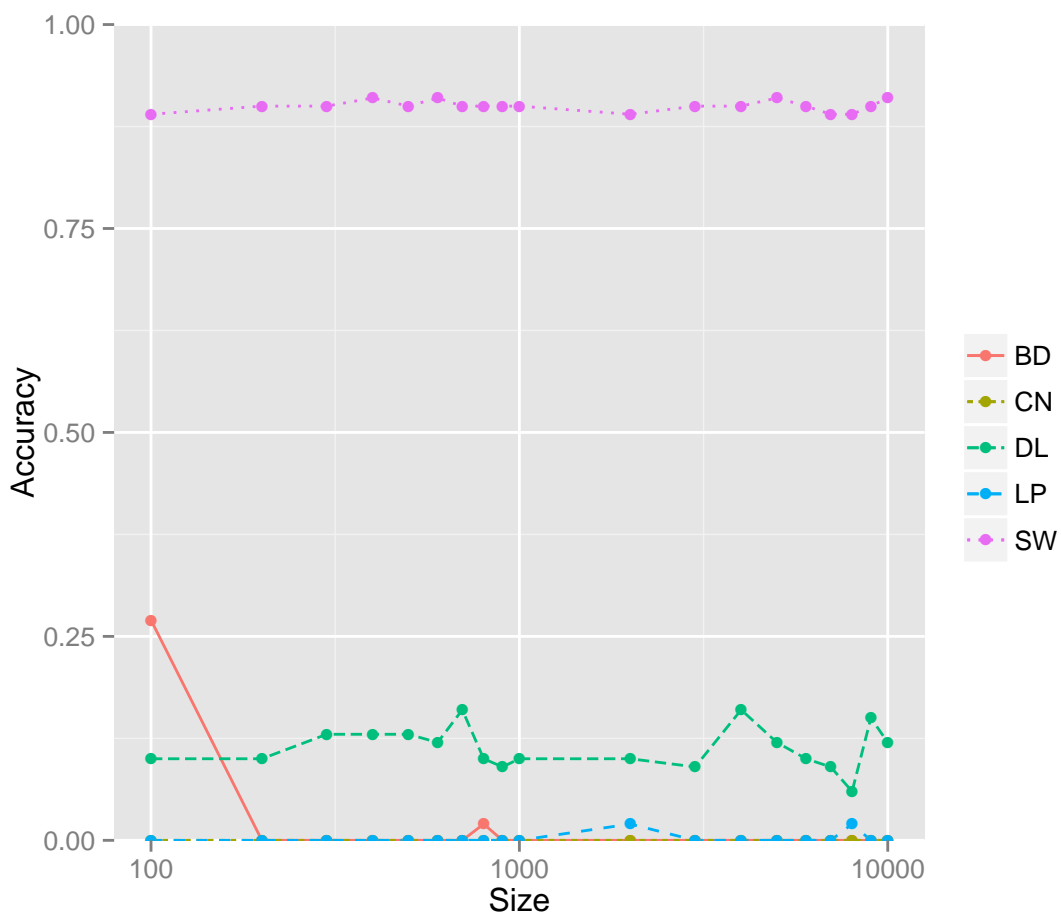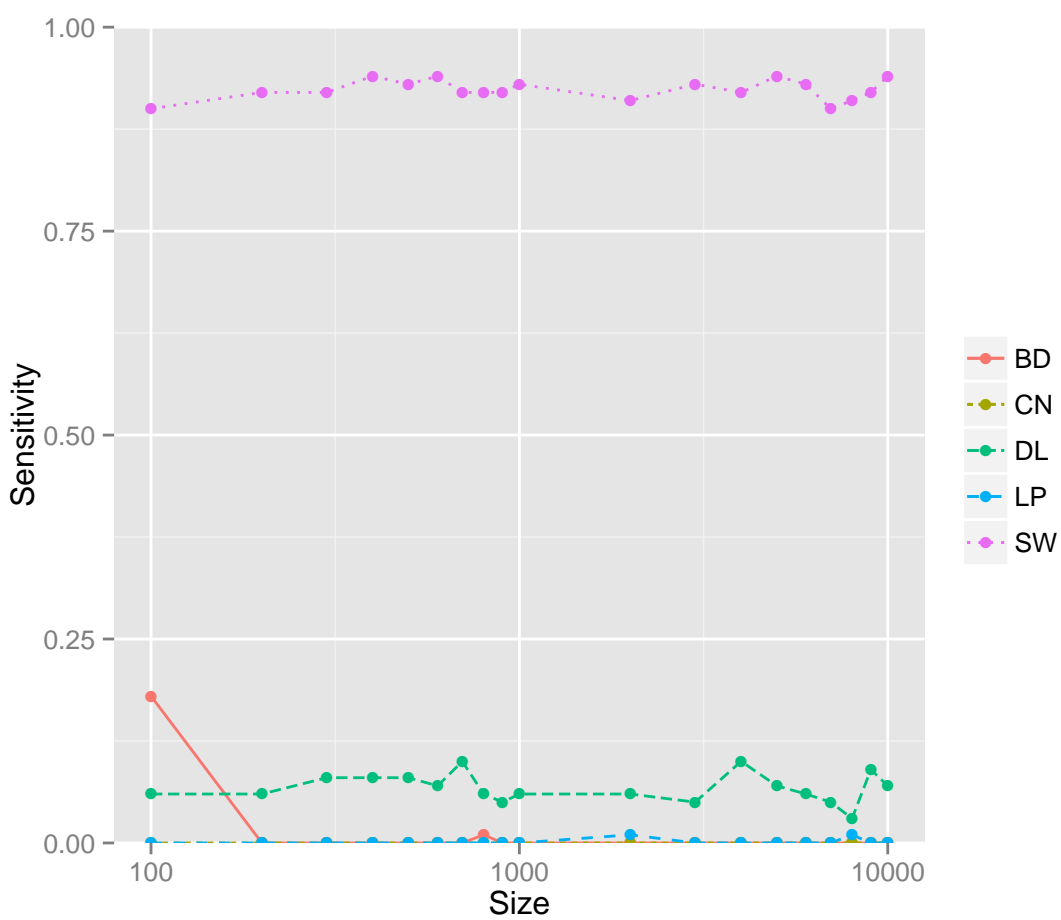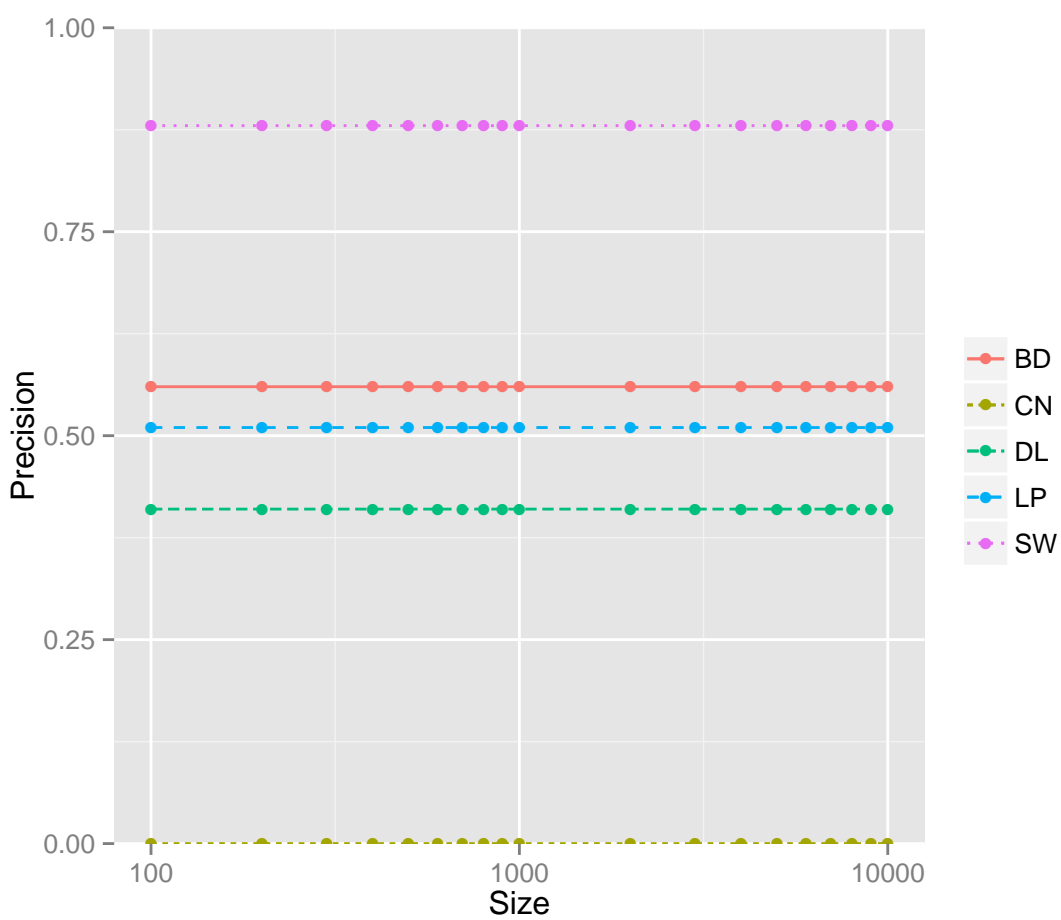



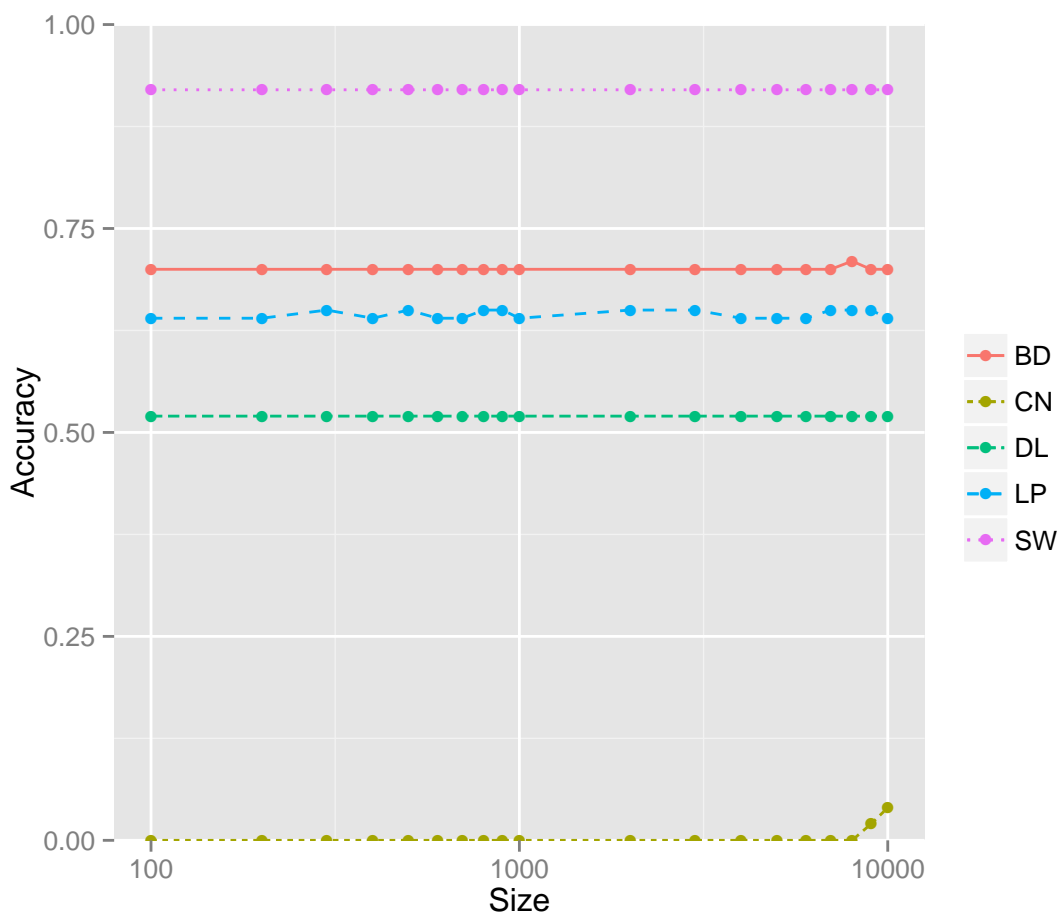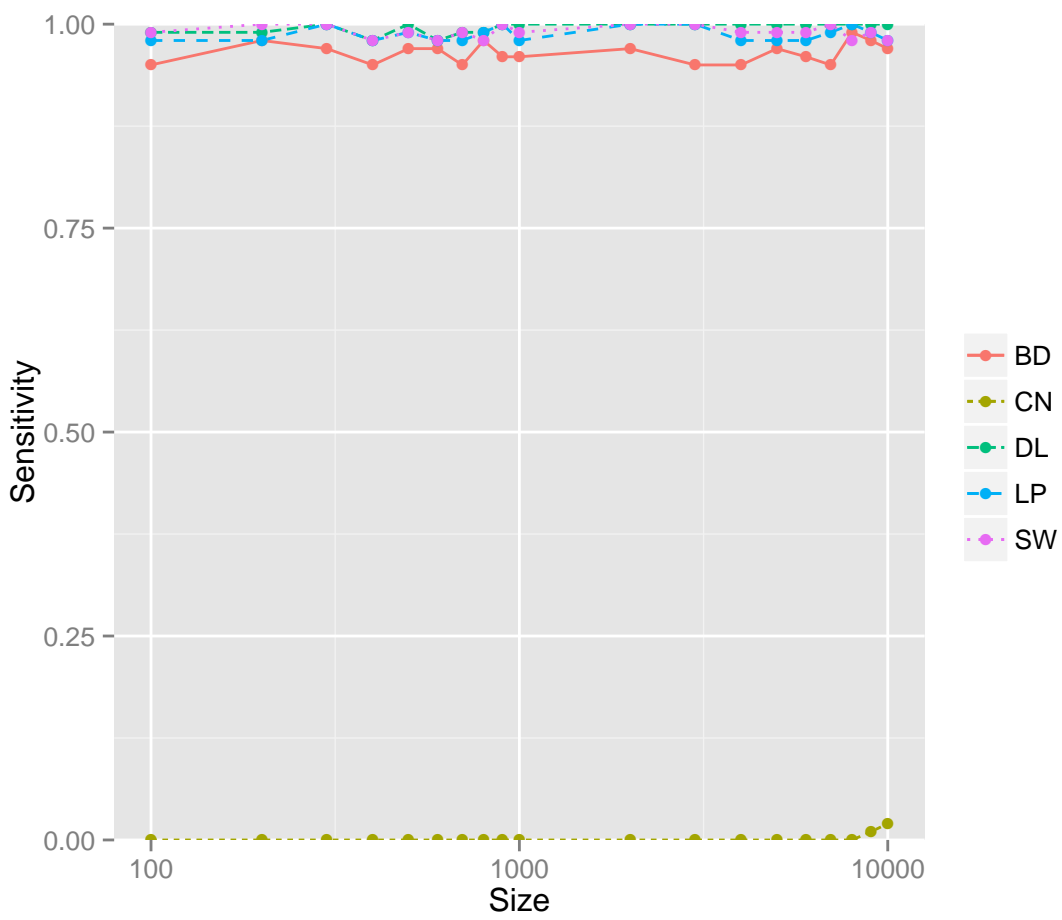

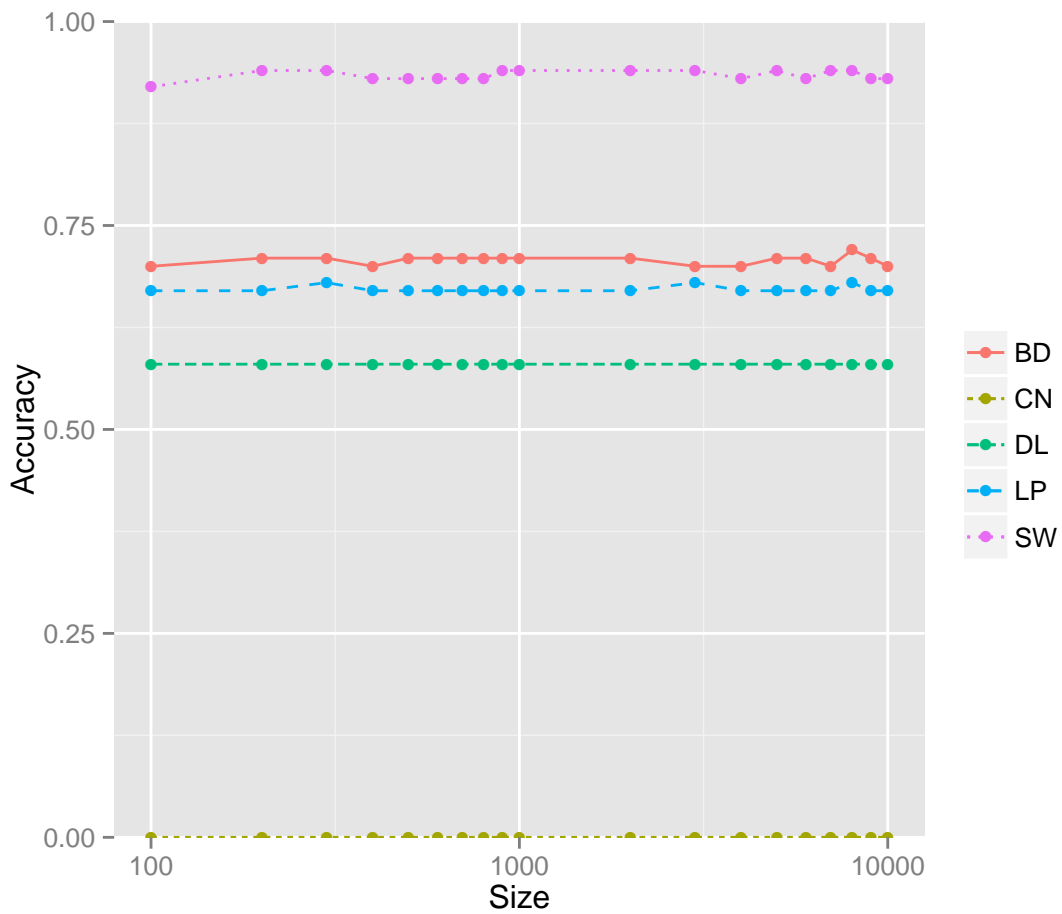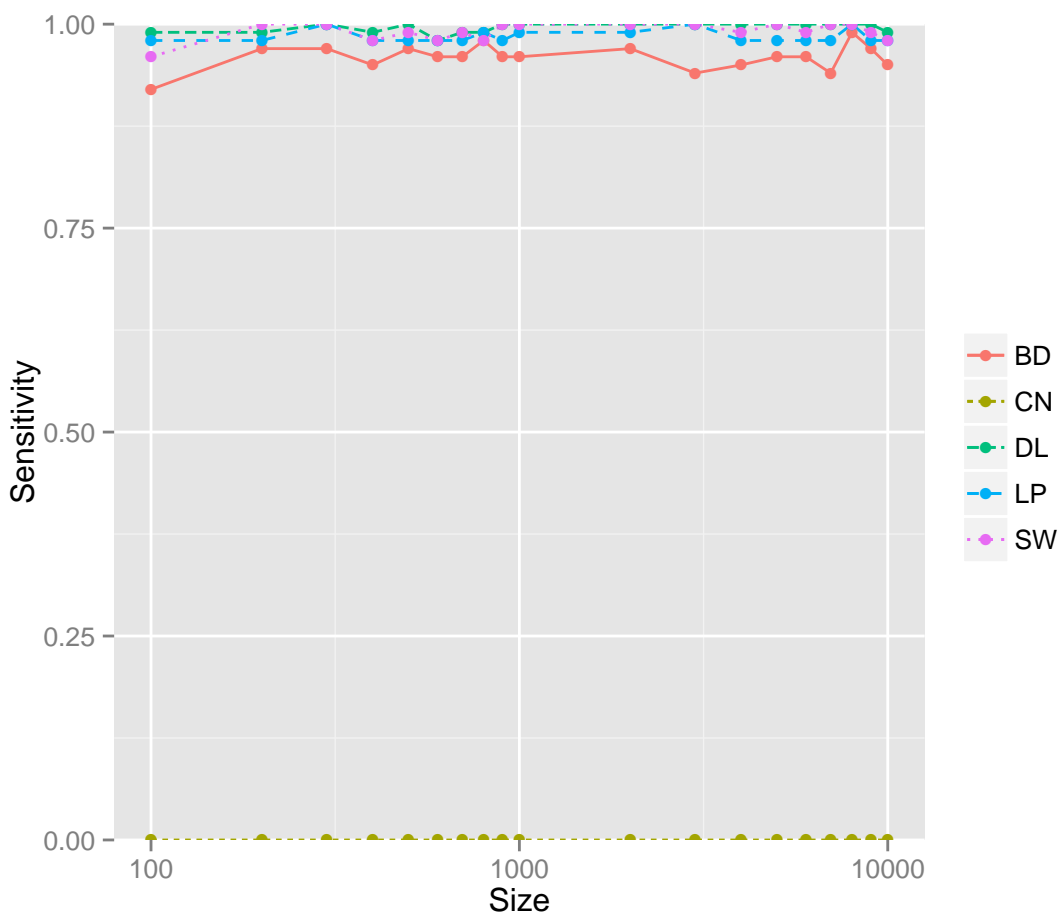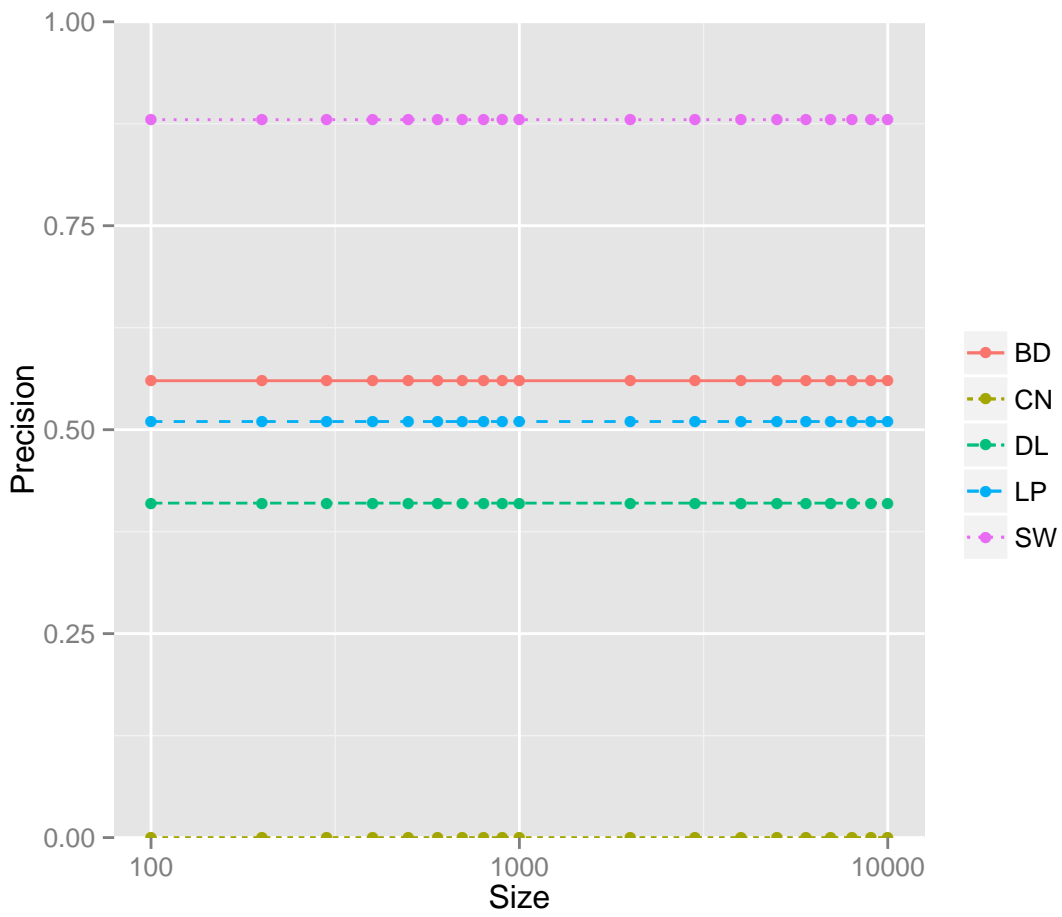

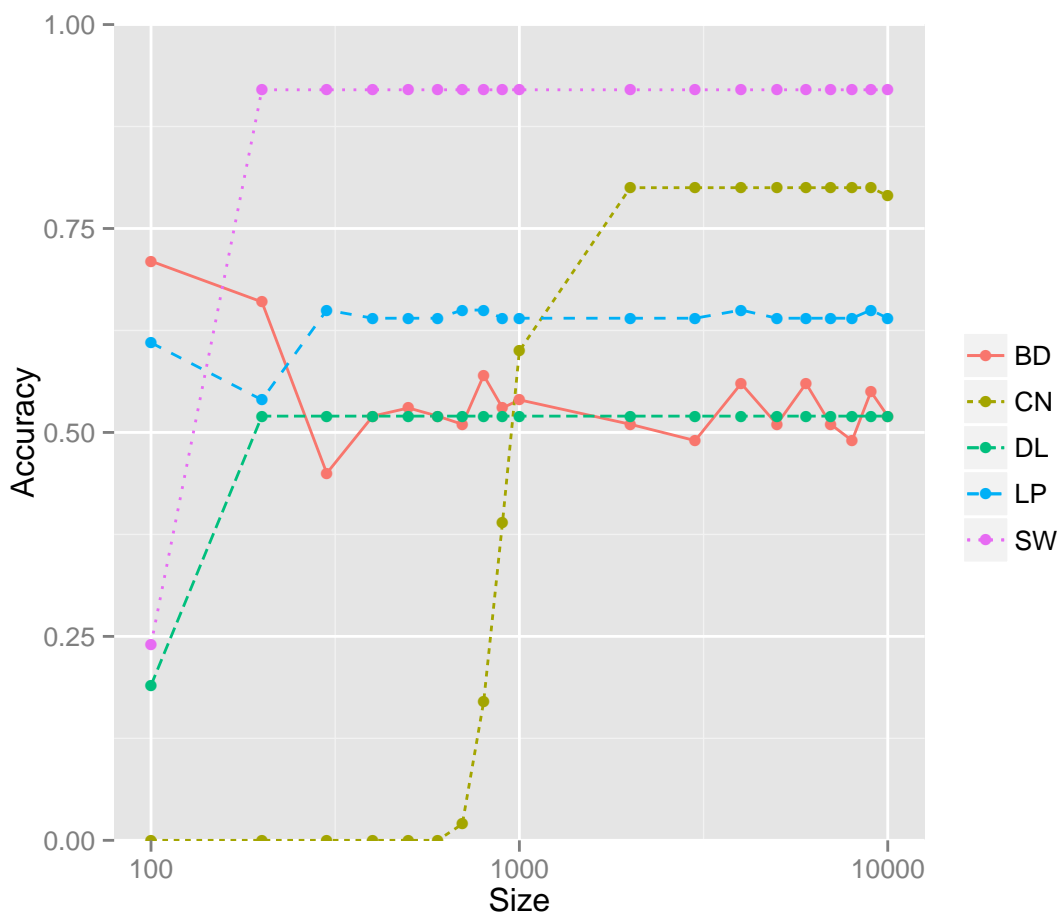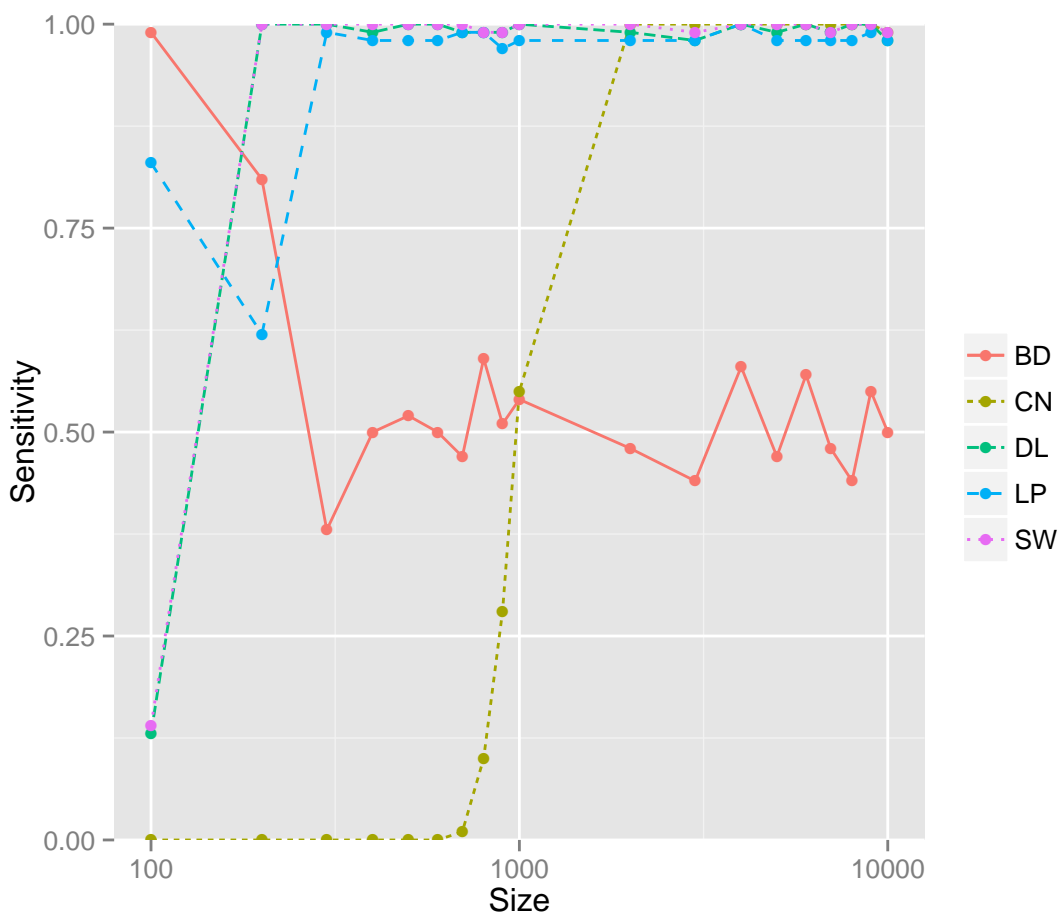

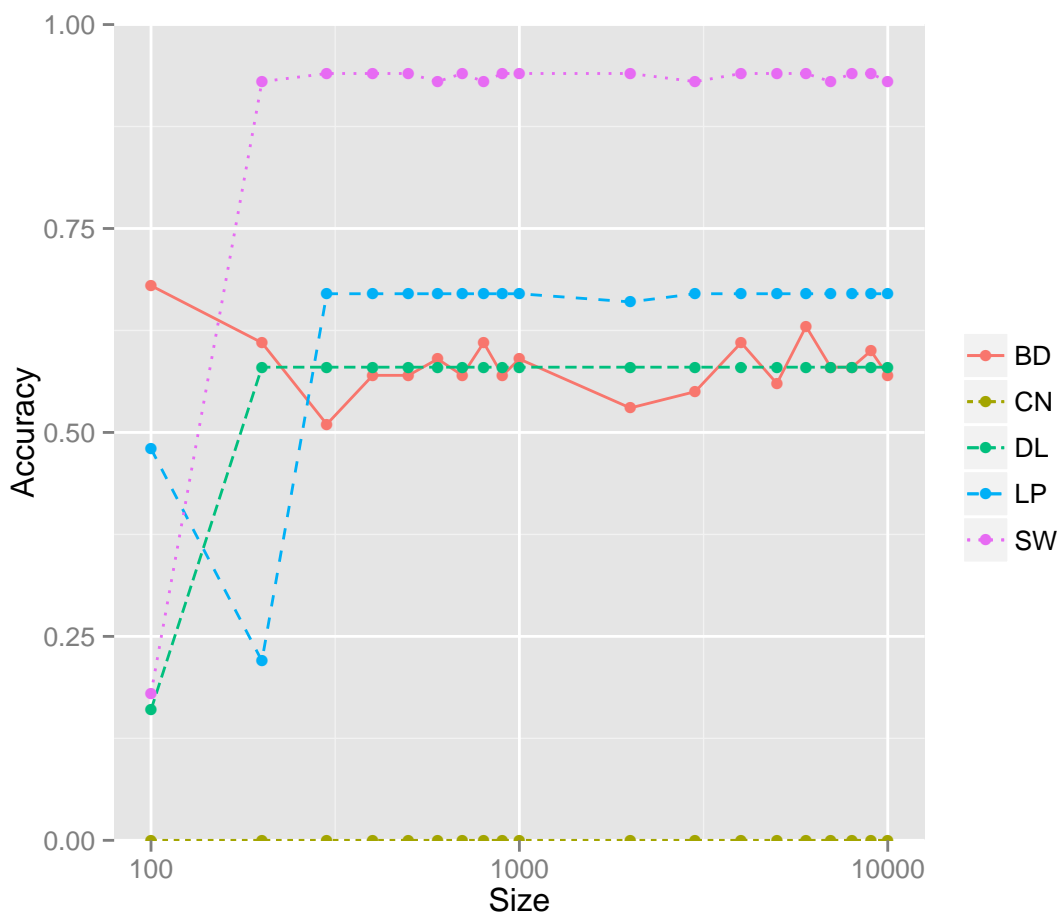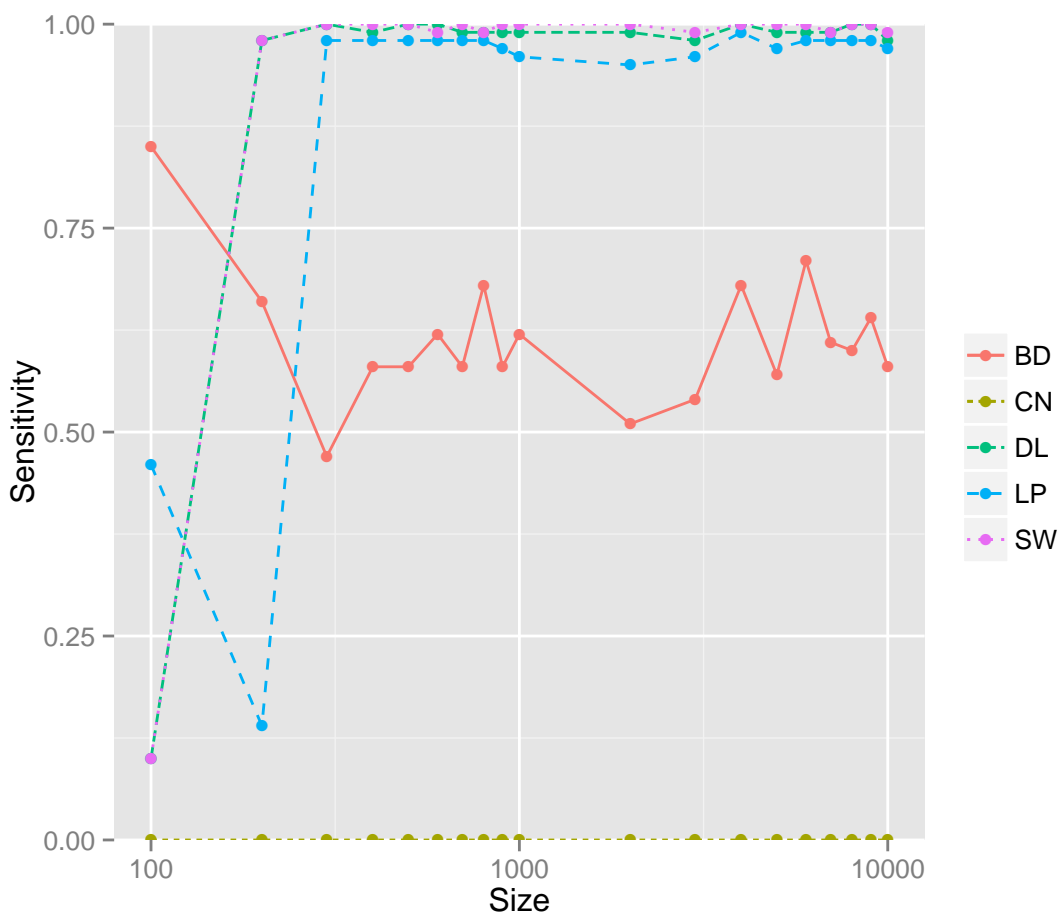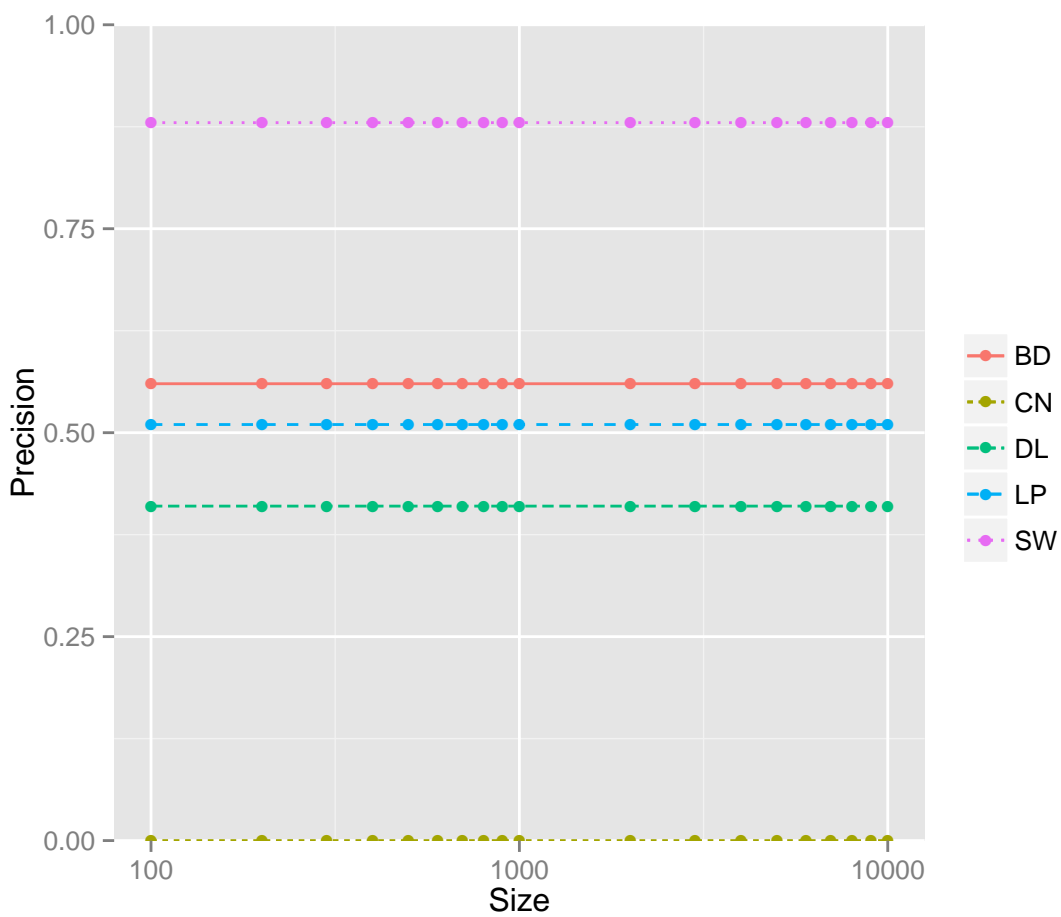

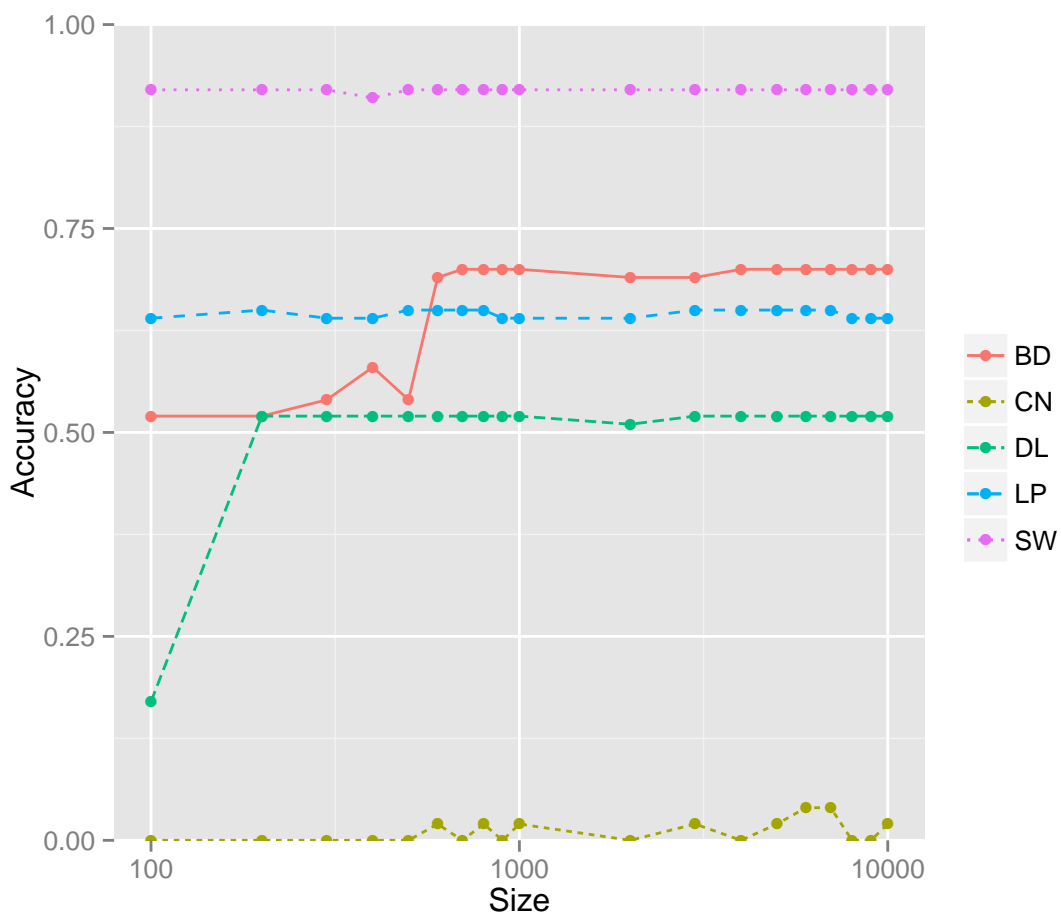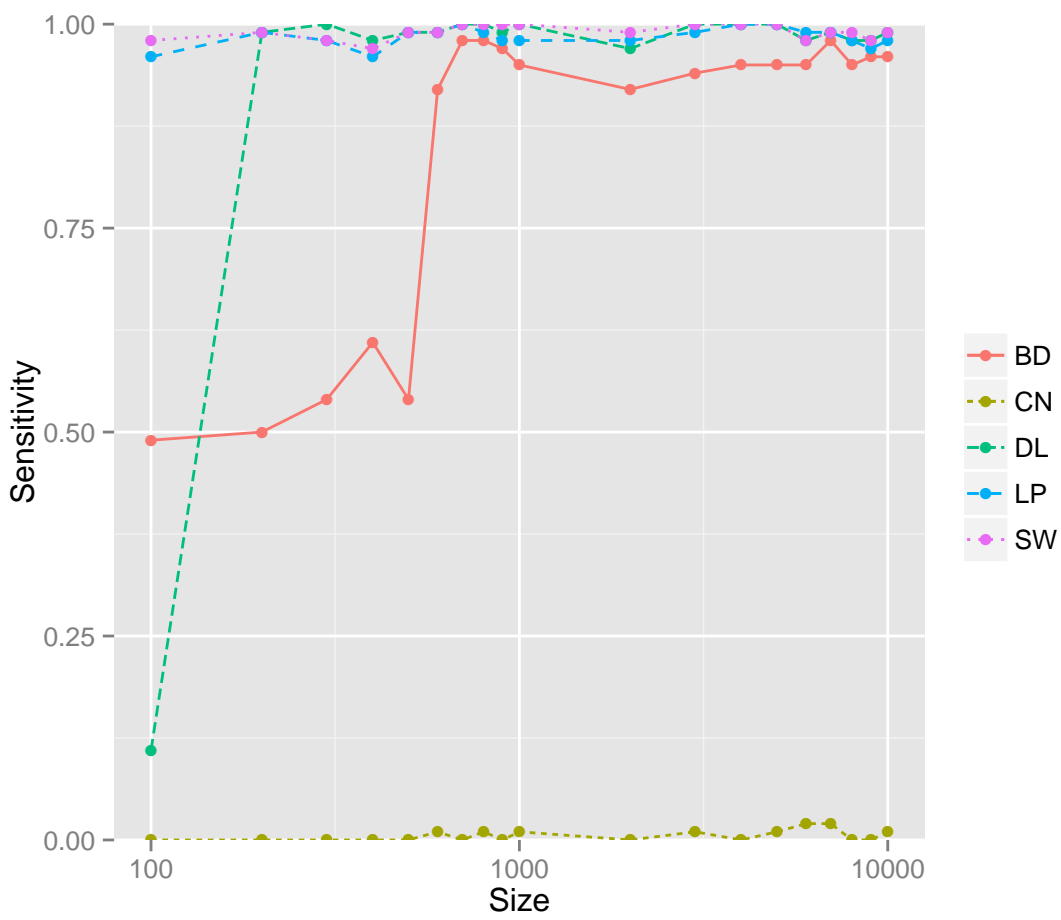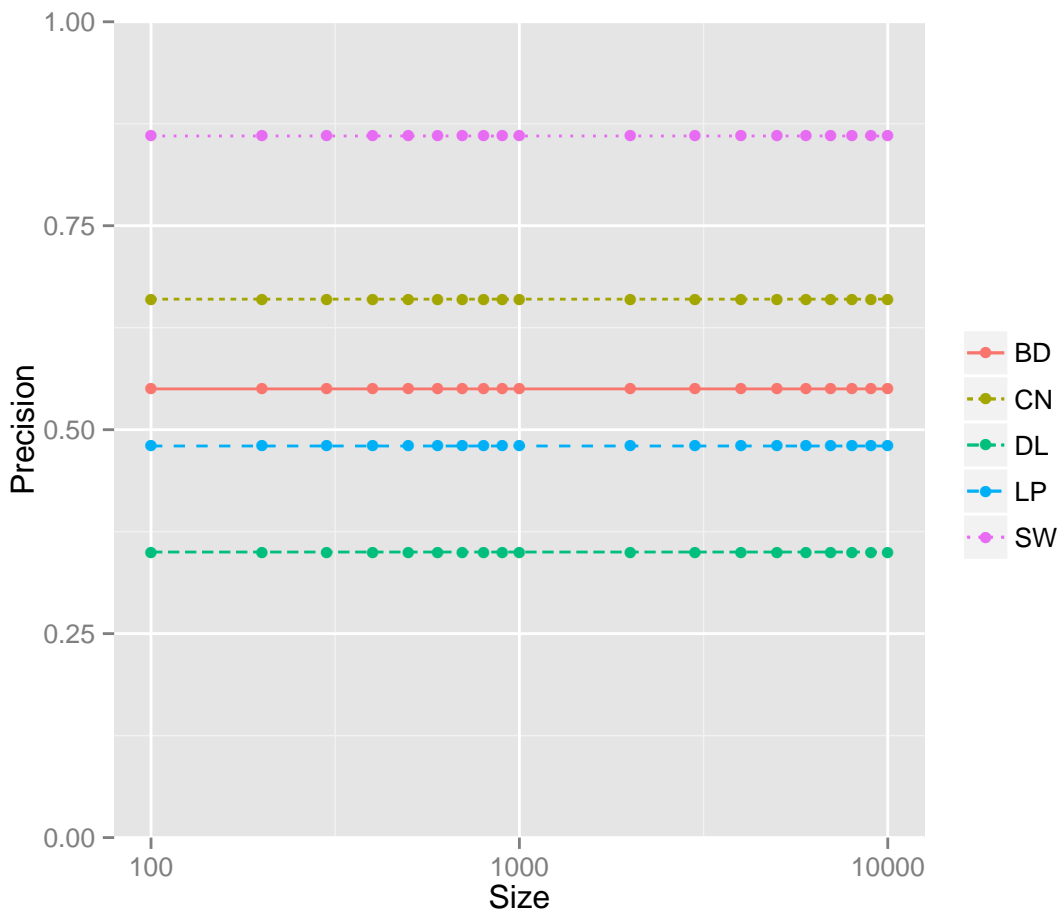

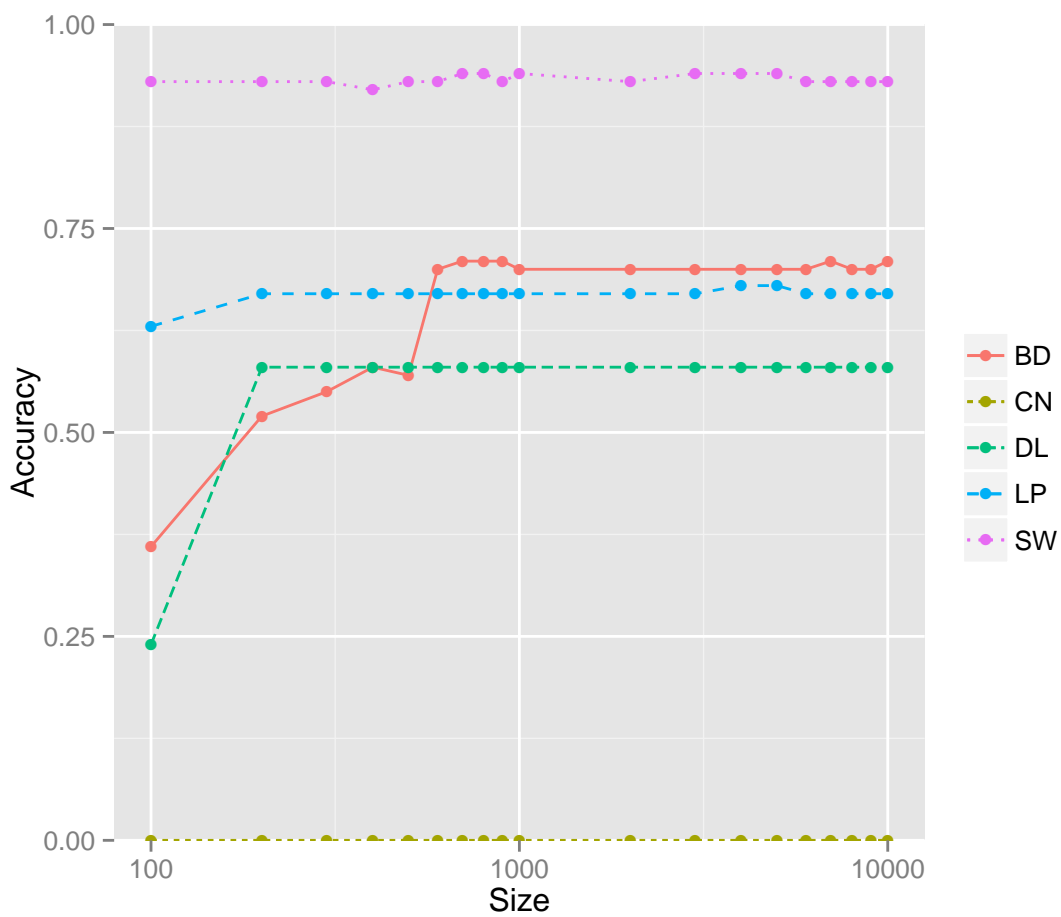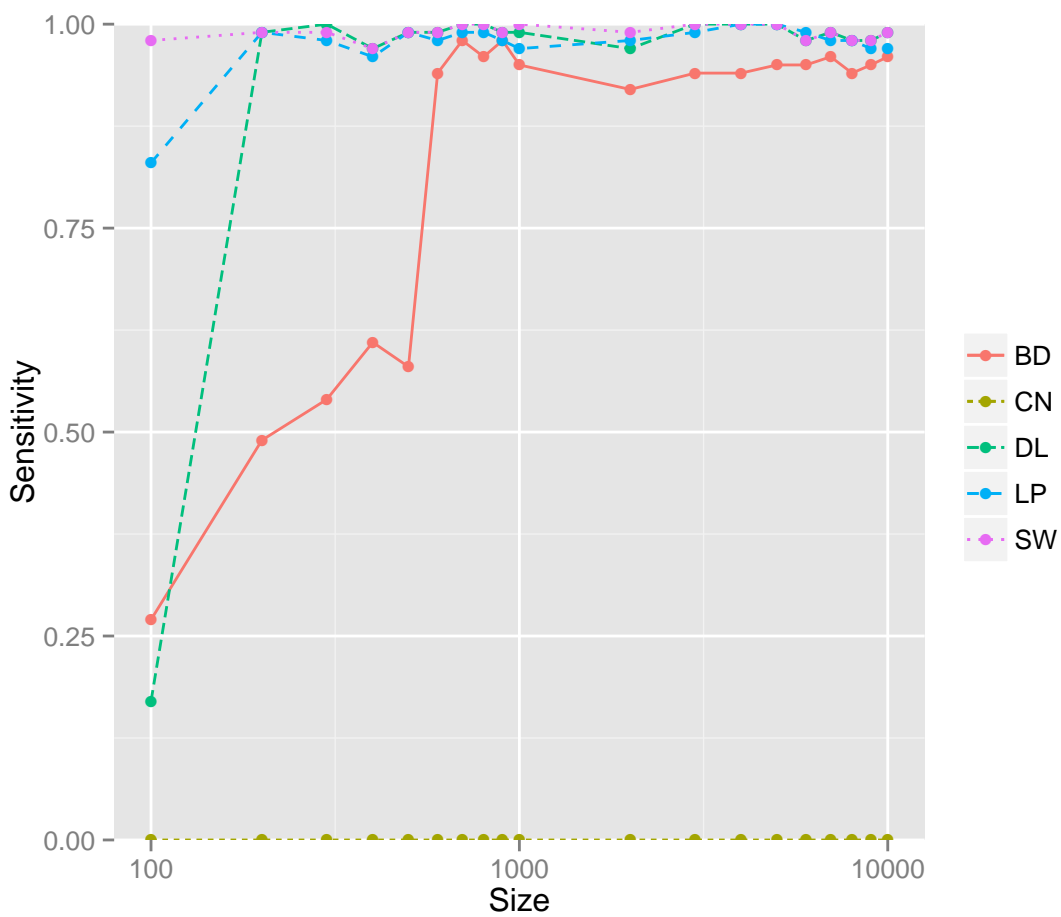

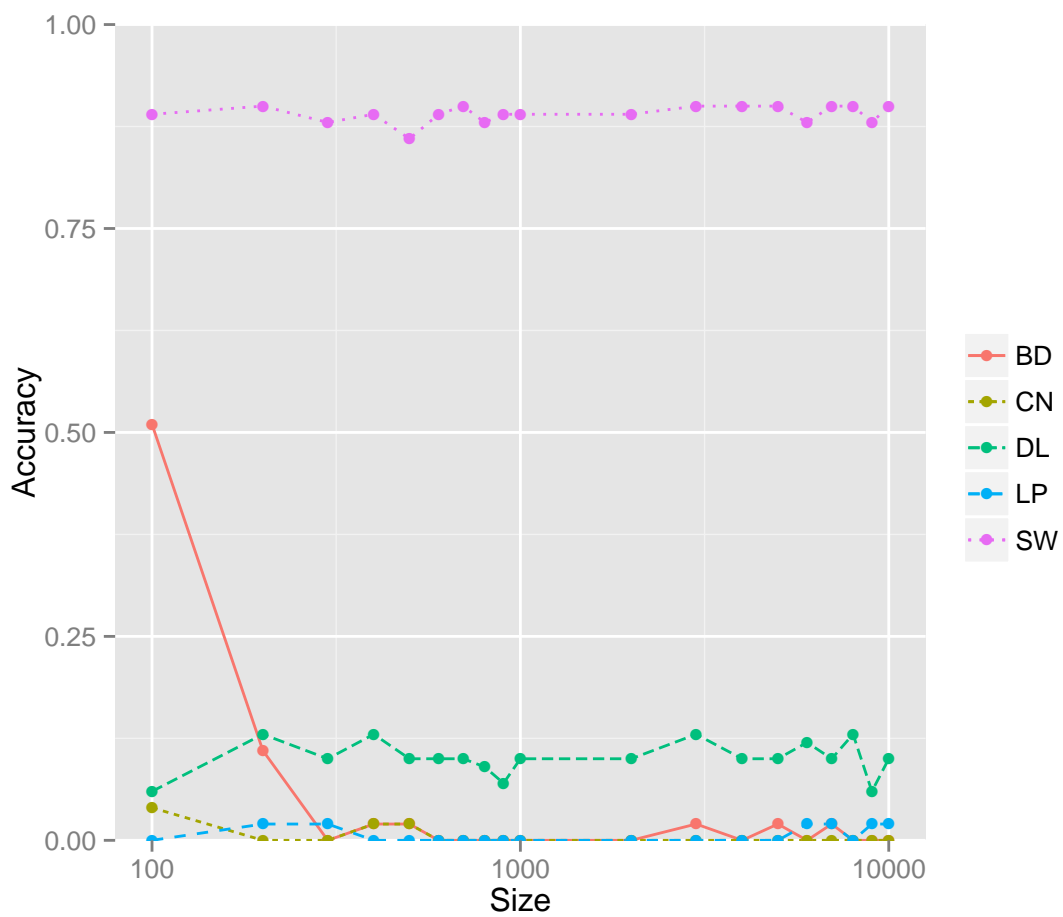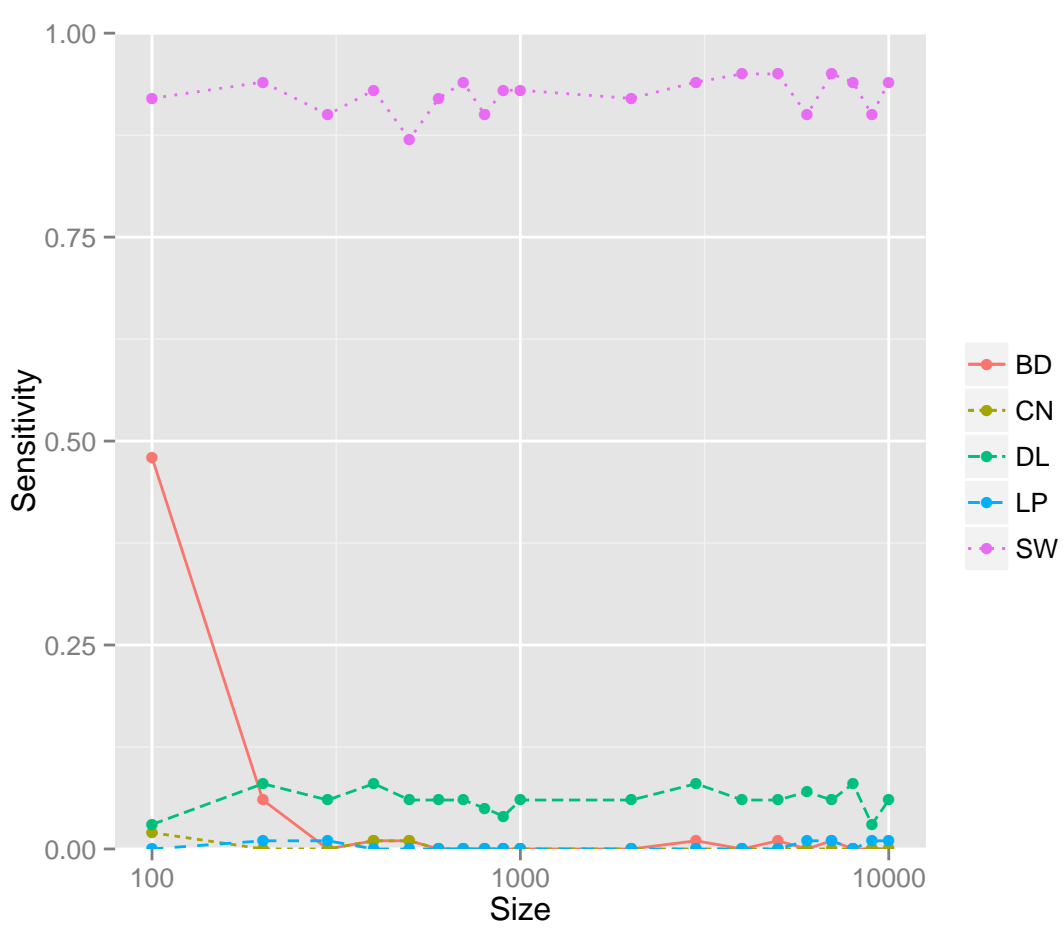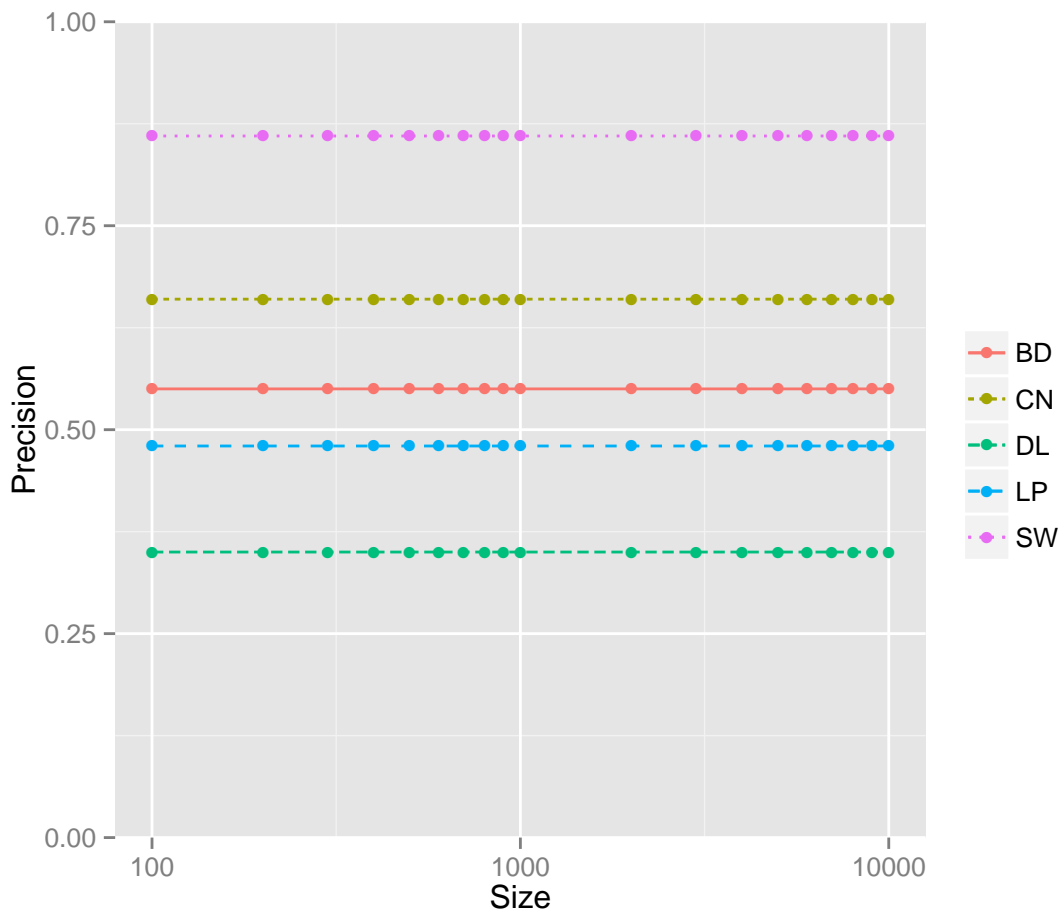

hesize.tri:Sensitivity for tri in heterozygous settings

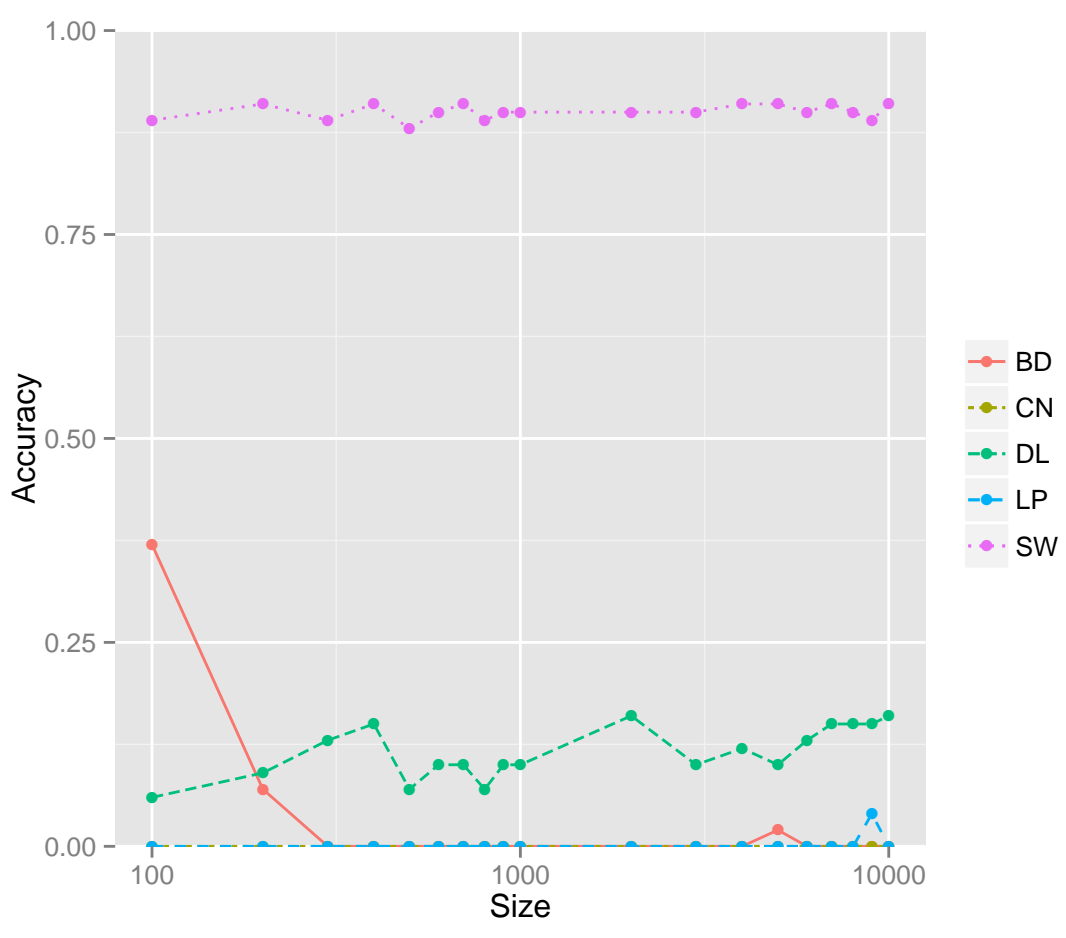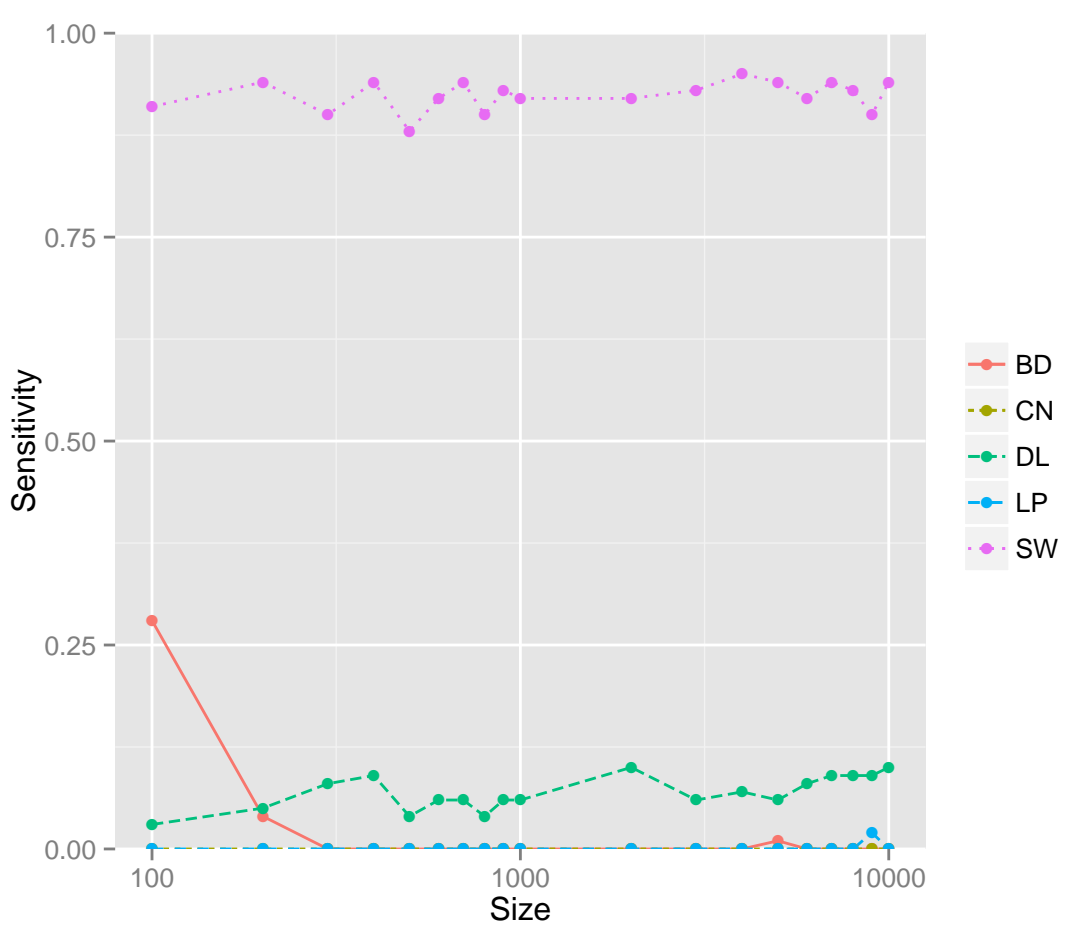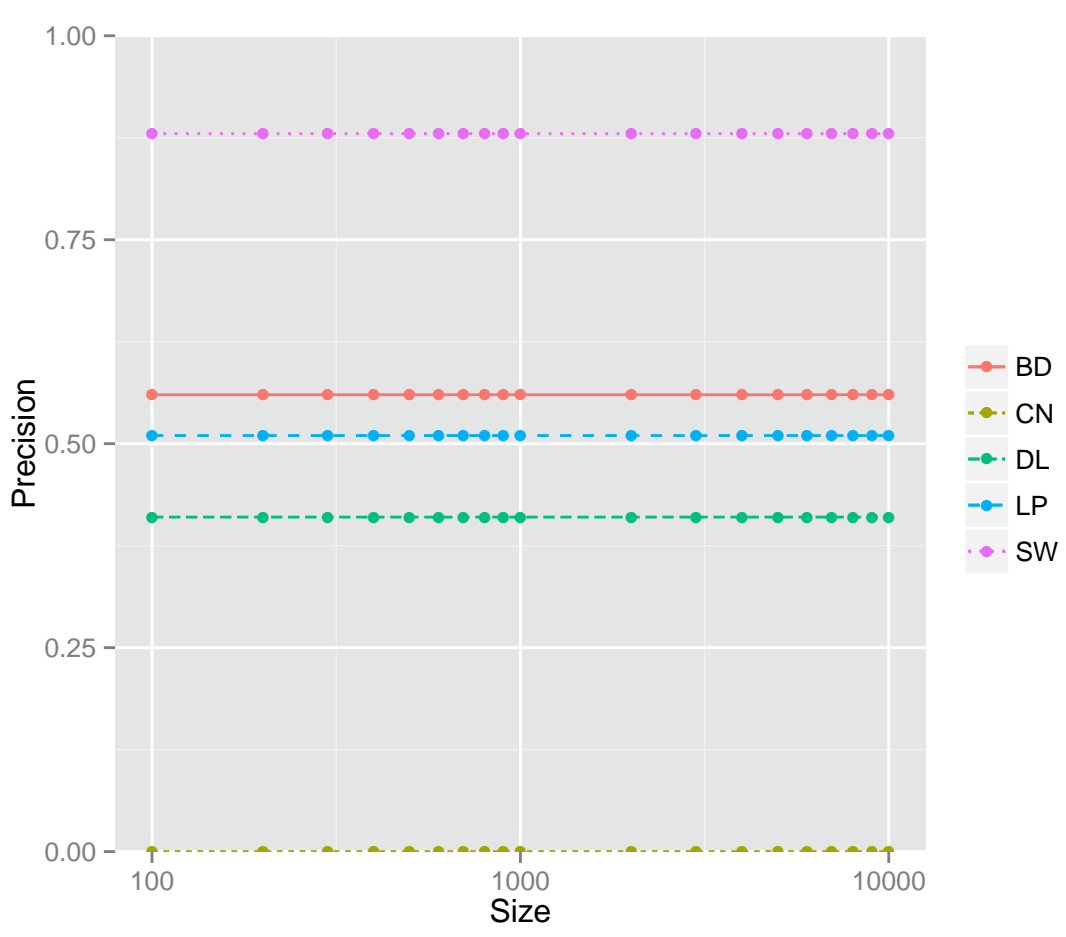



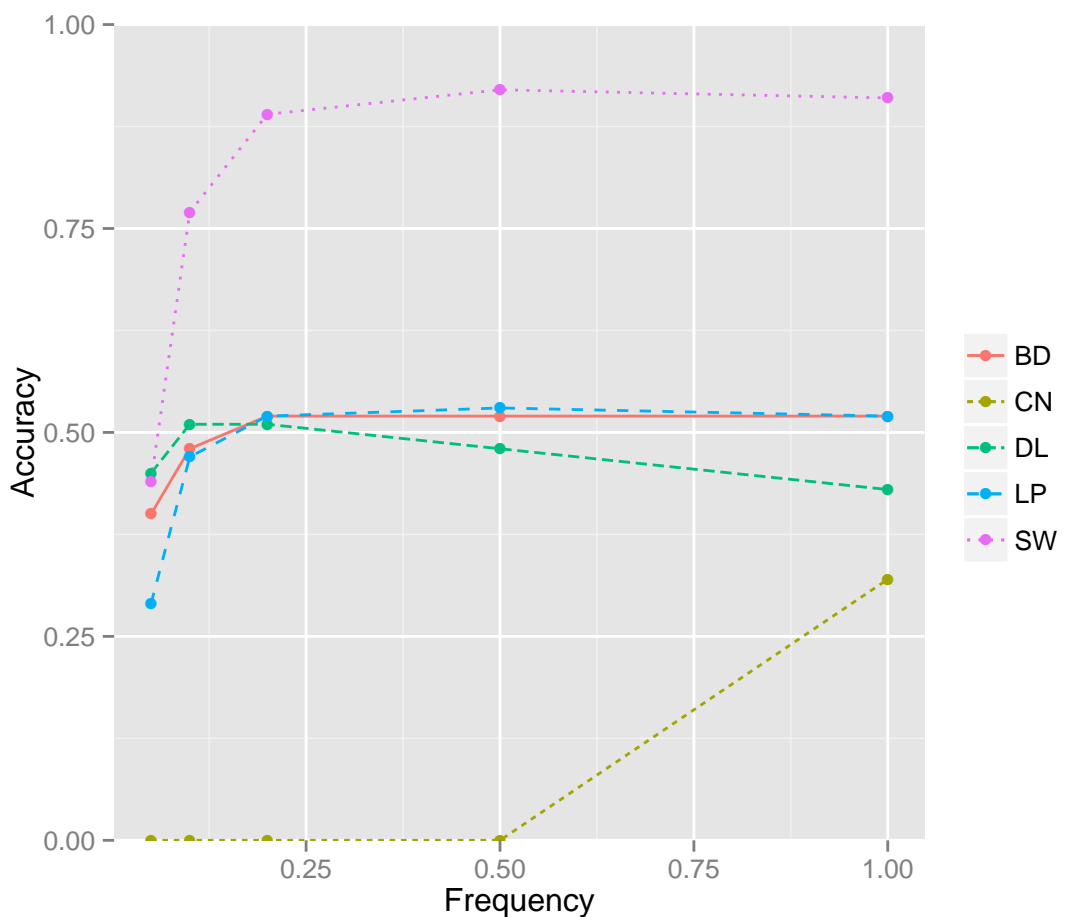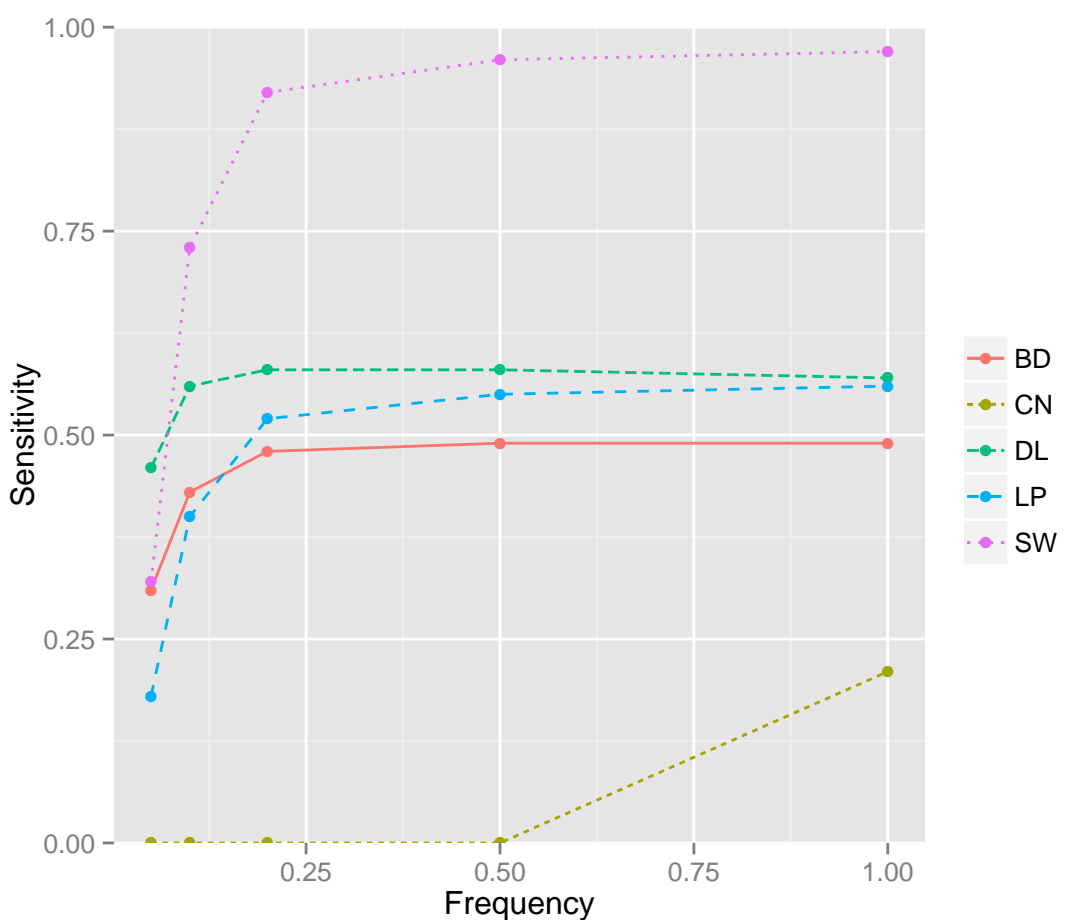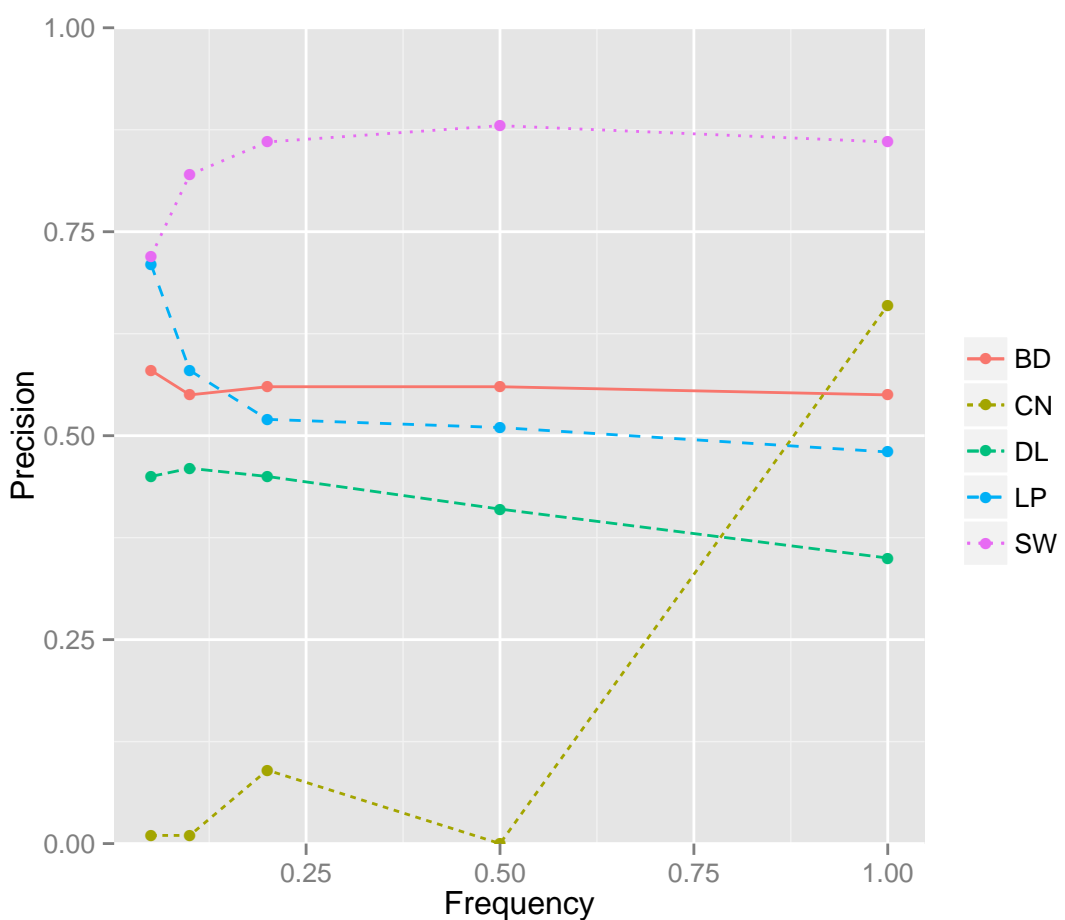

cvg.all:Accuracy, Precision and Sensitivity for all vs coverage (c)

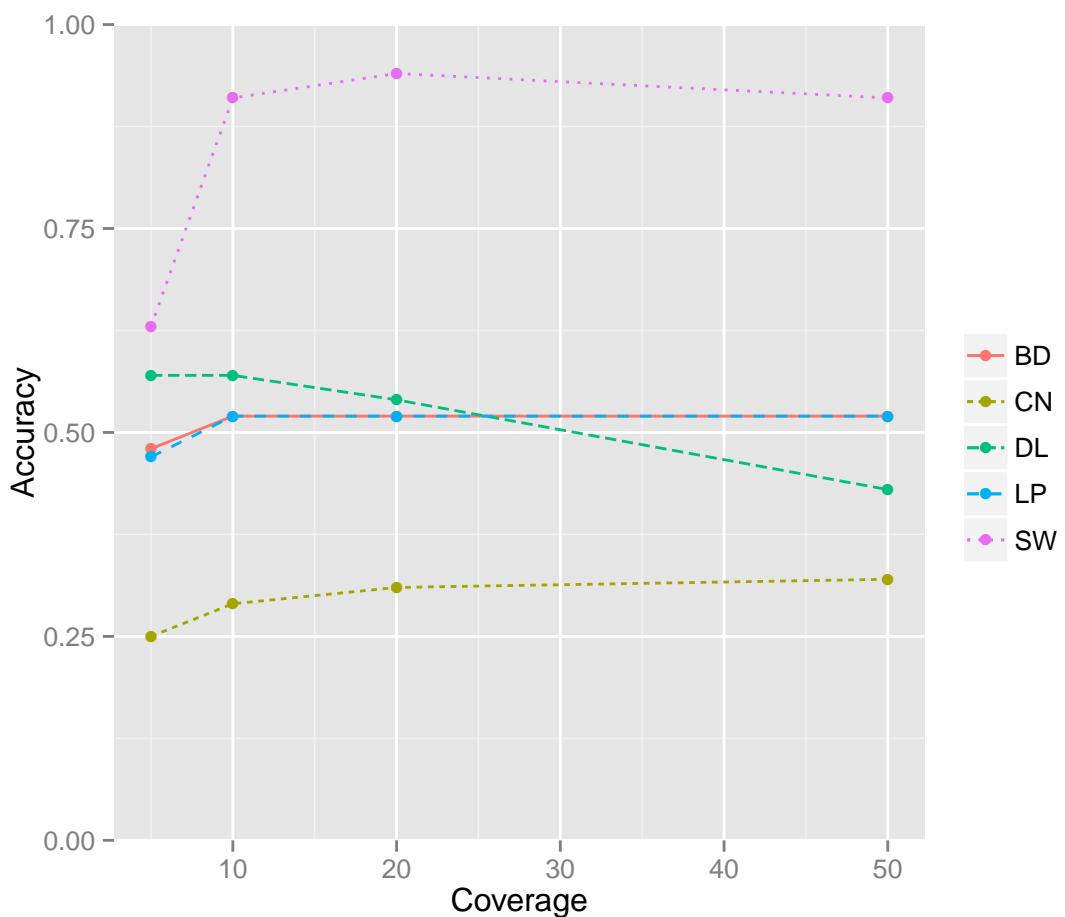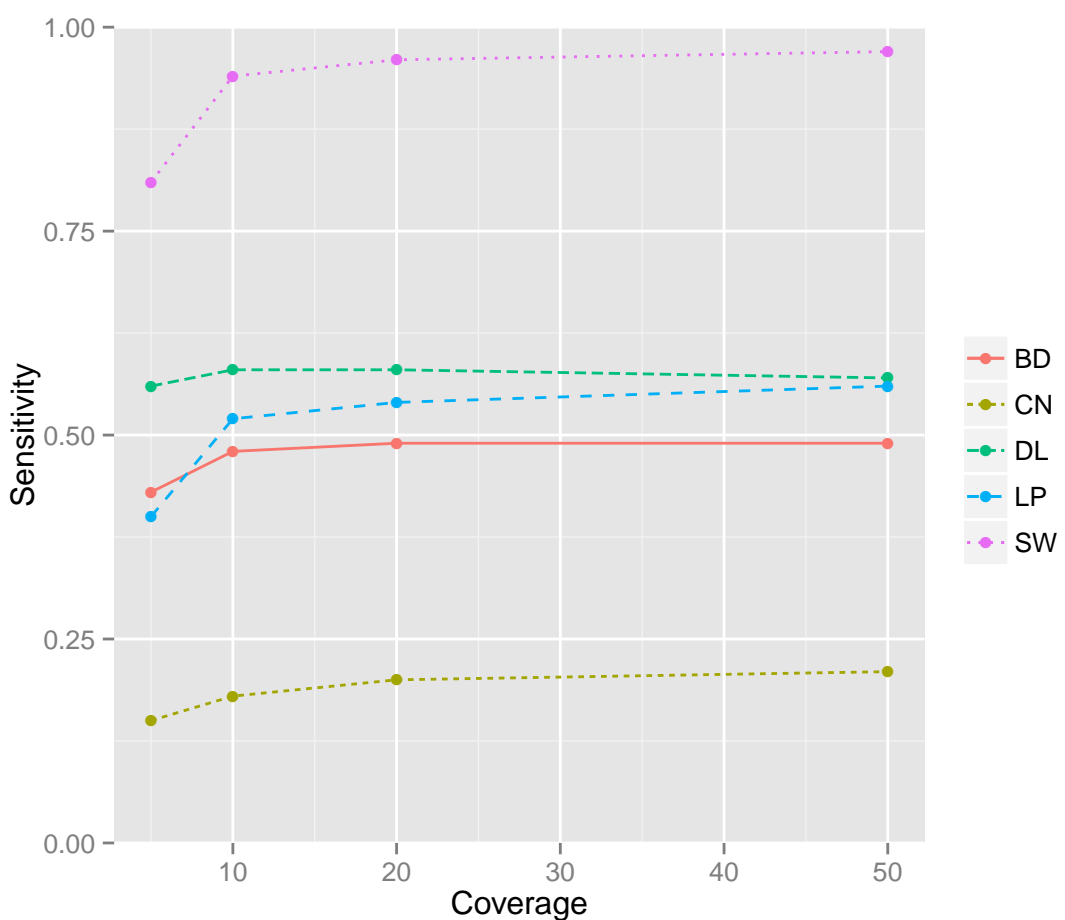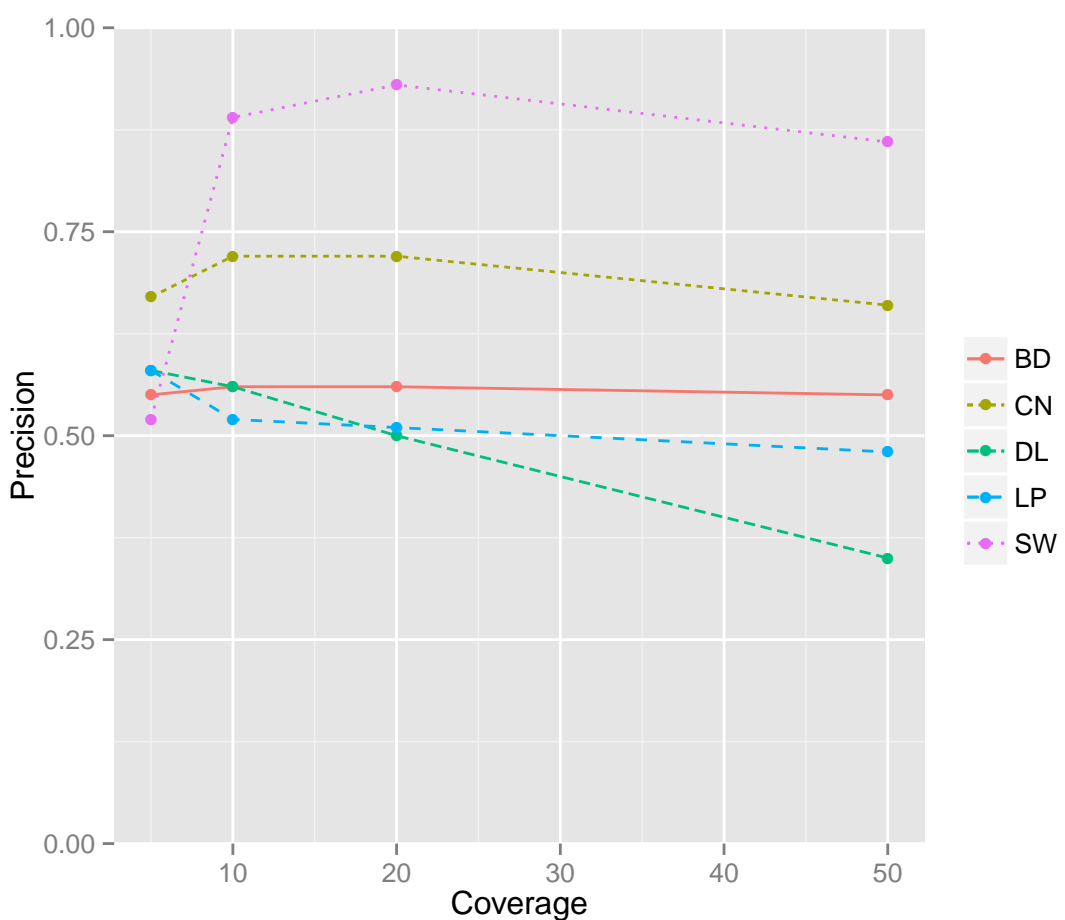

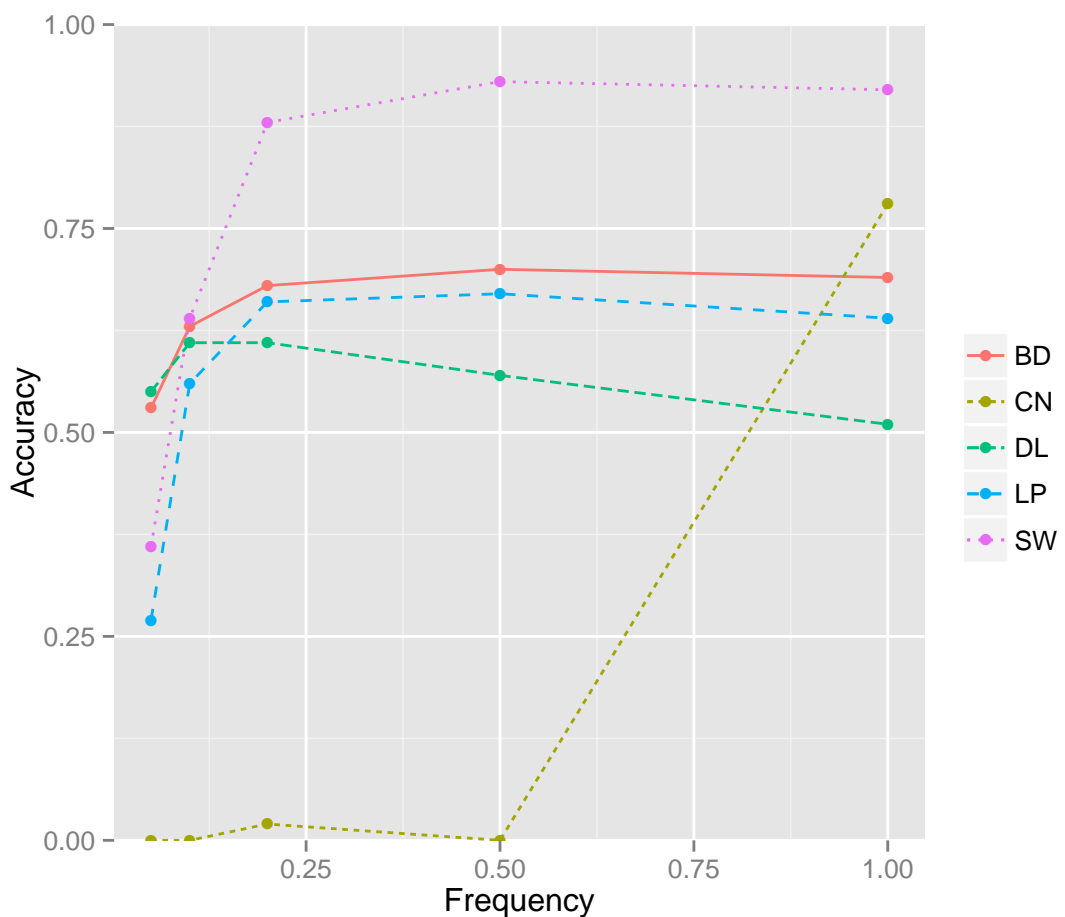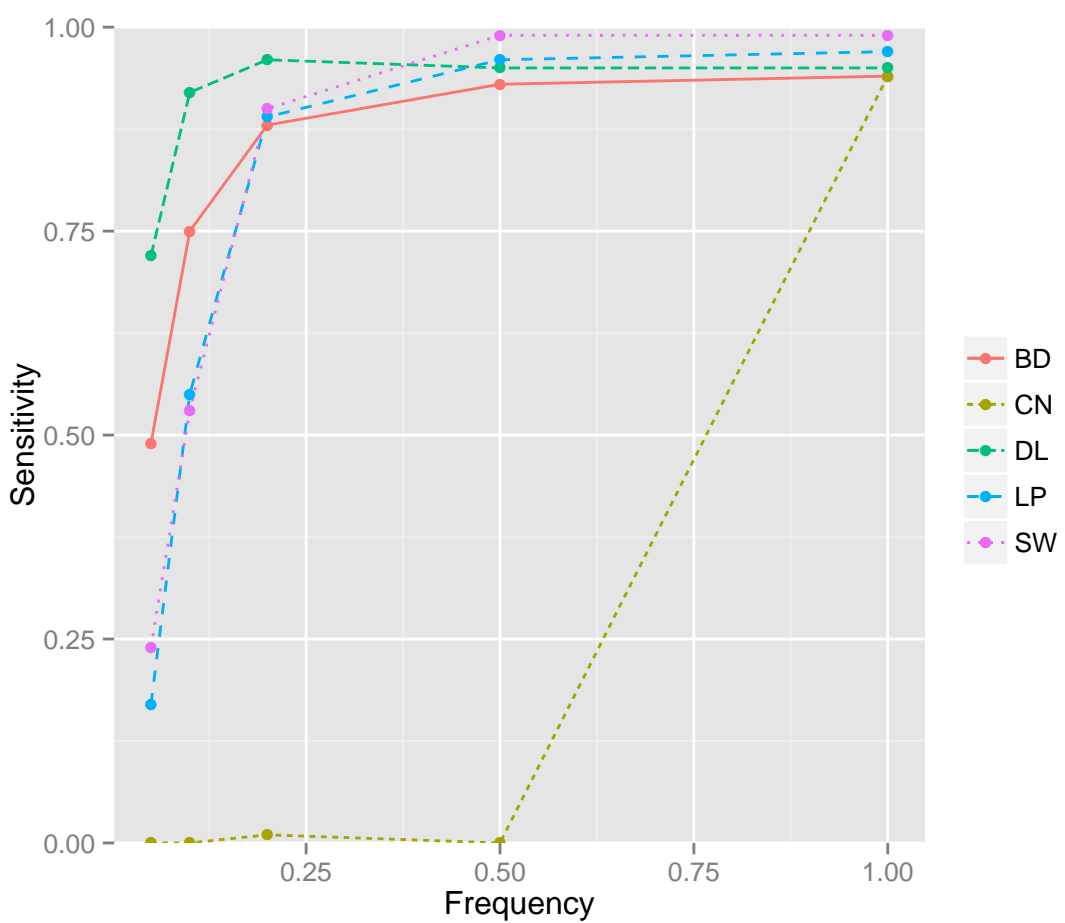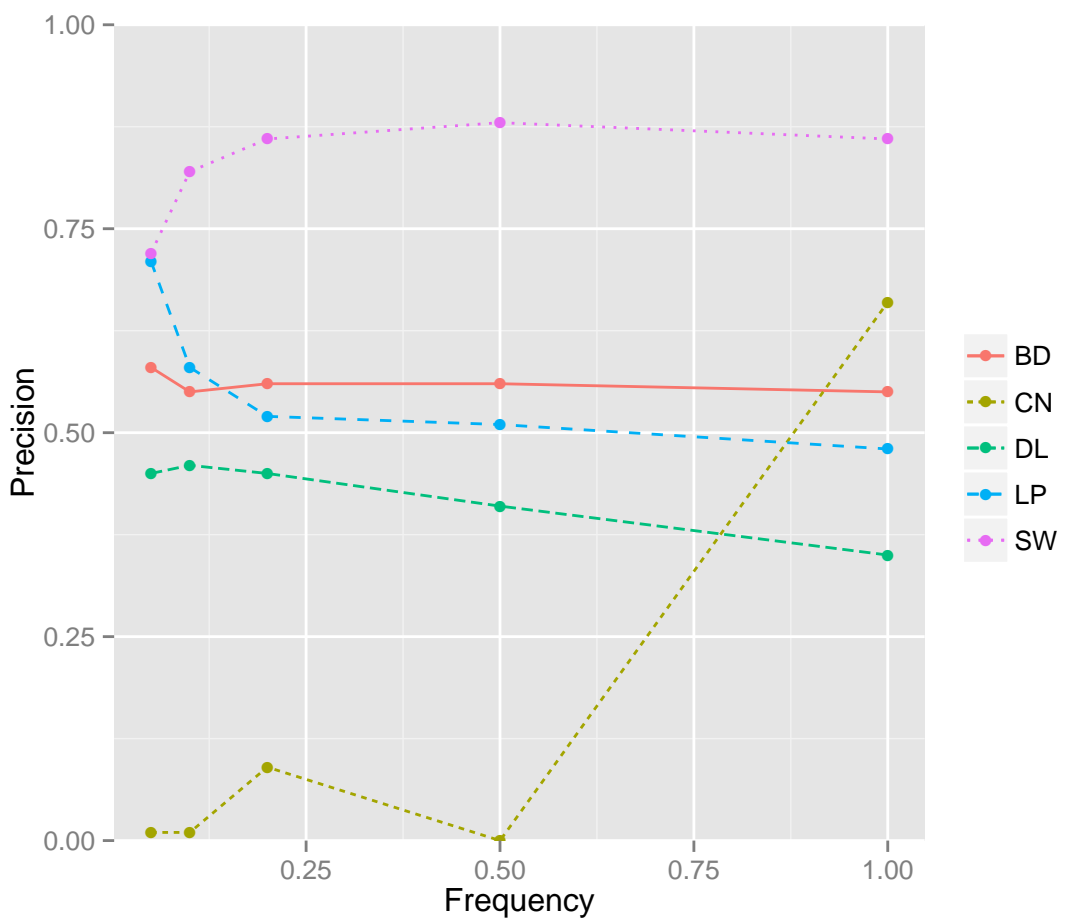

cvq.del:Accuracy, Precision and Sensitivity for del vs coverage (c)

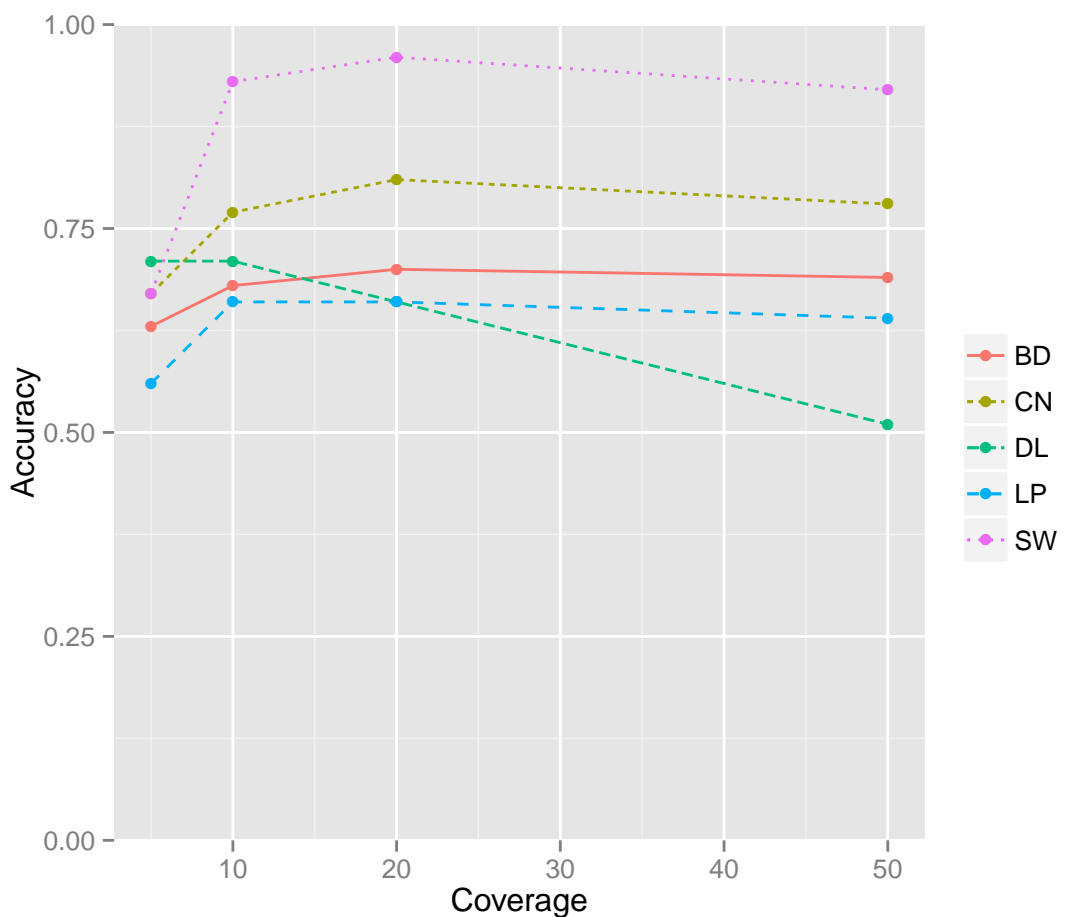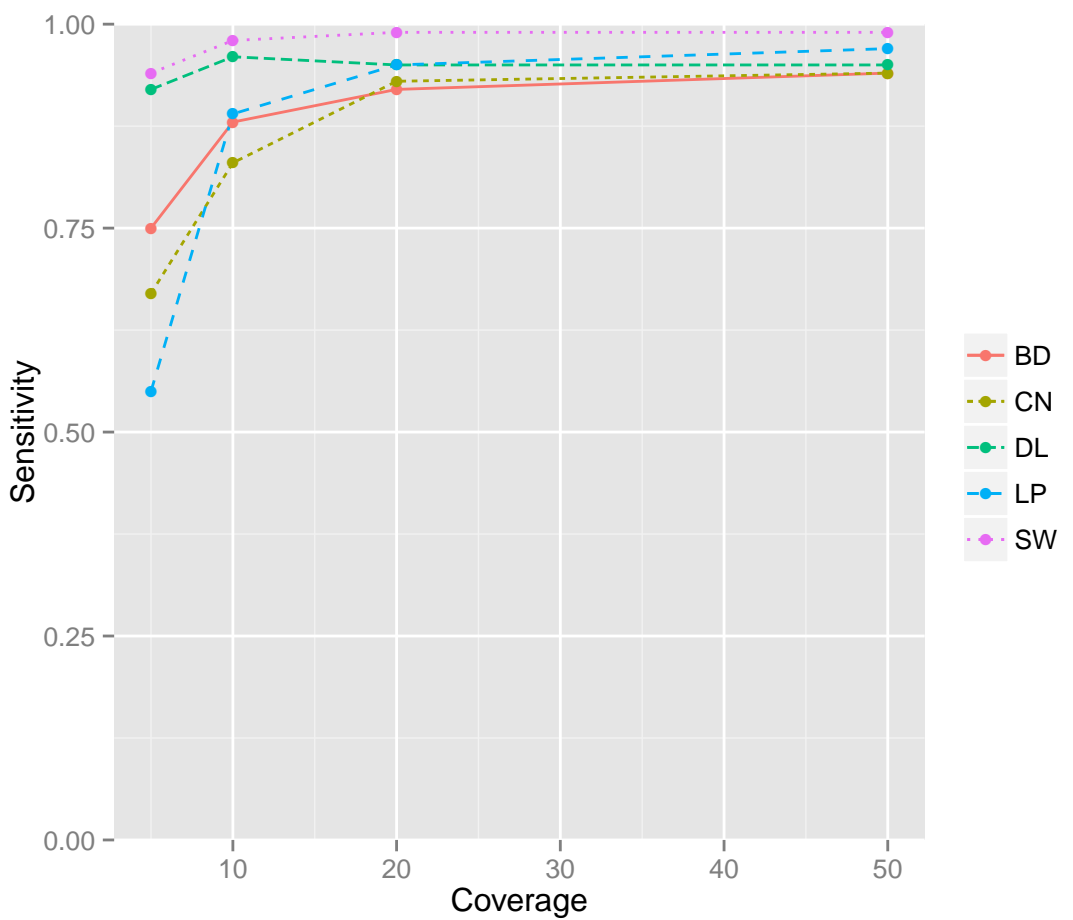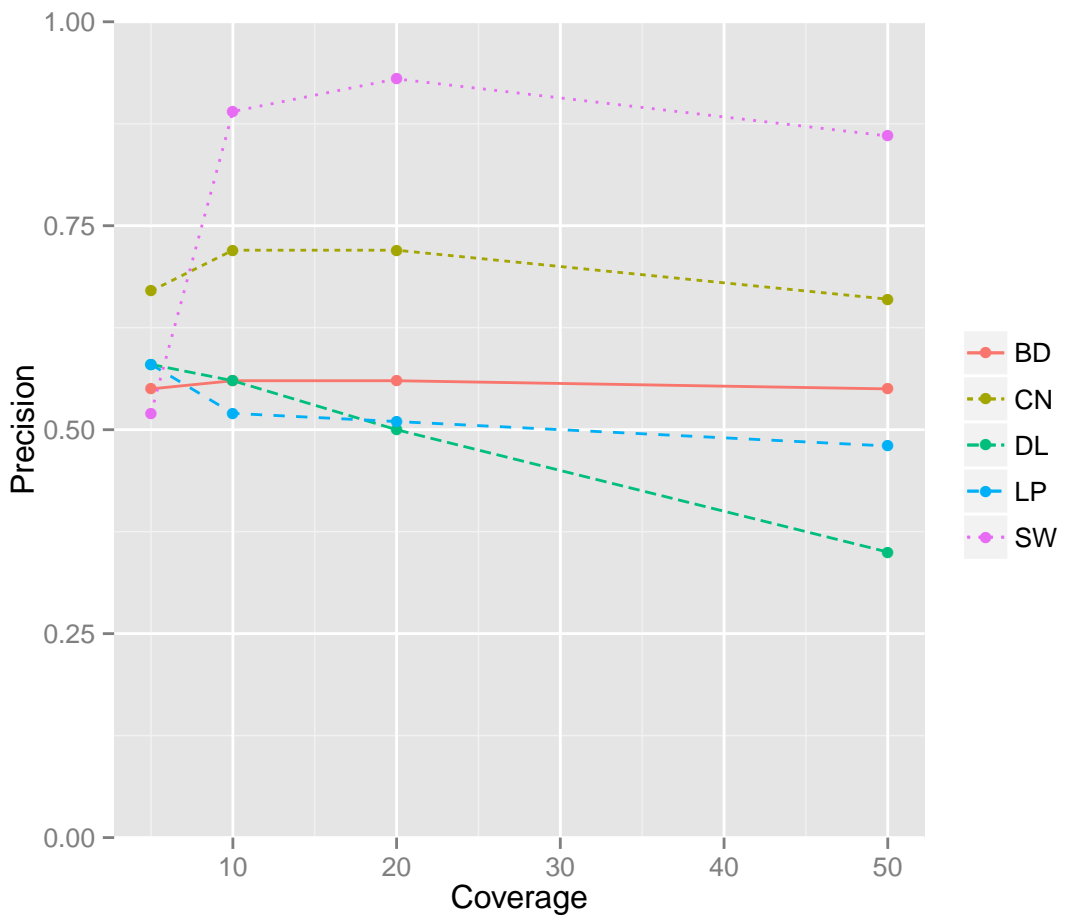

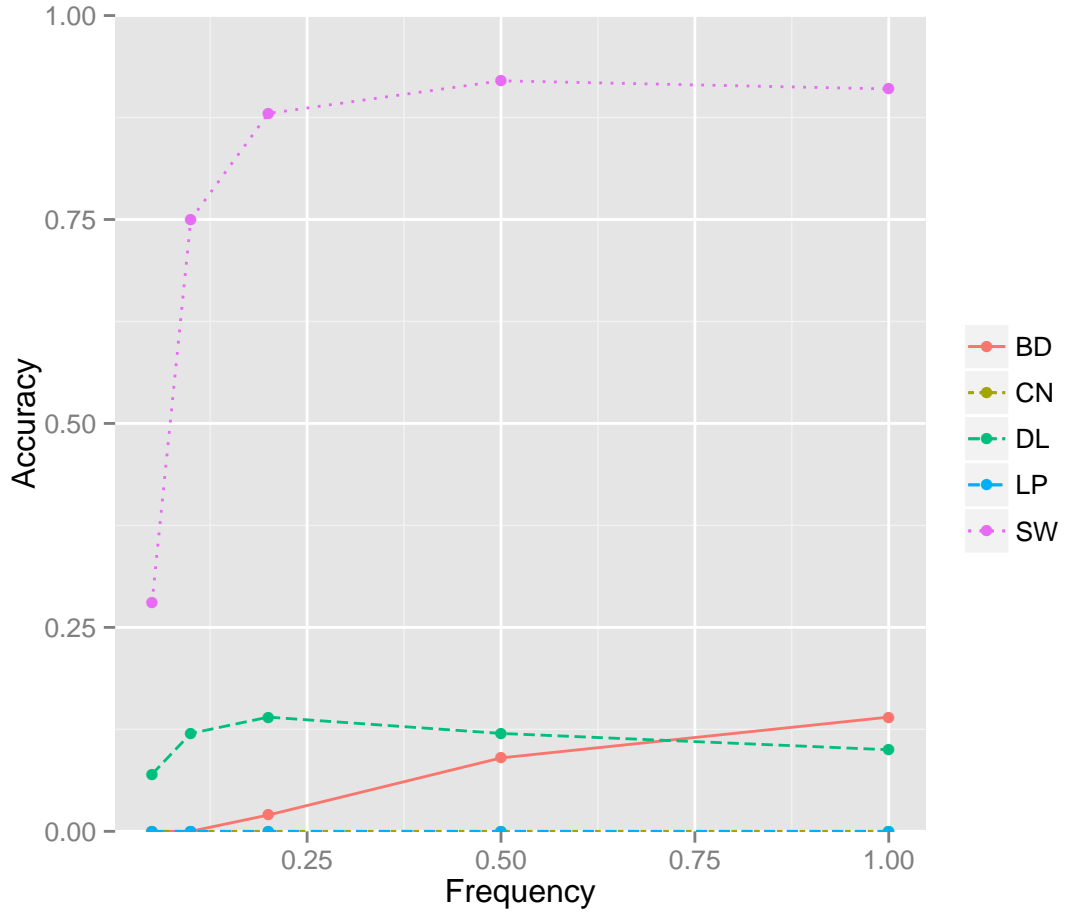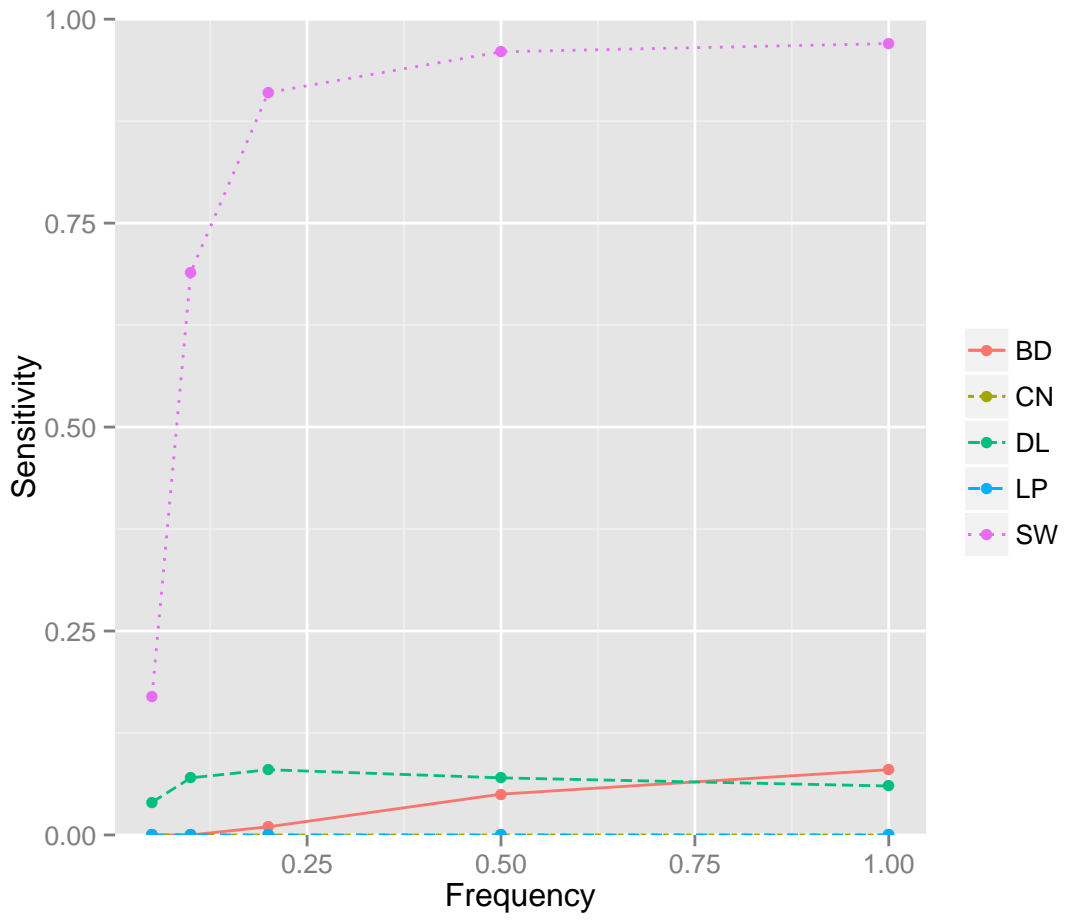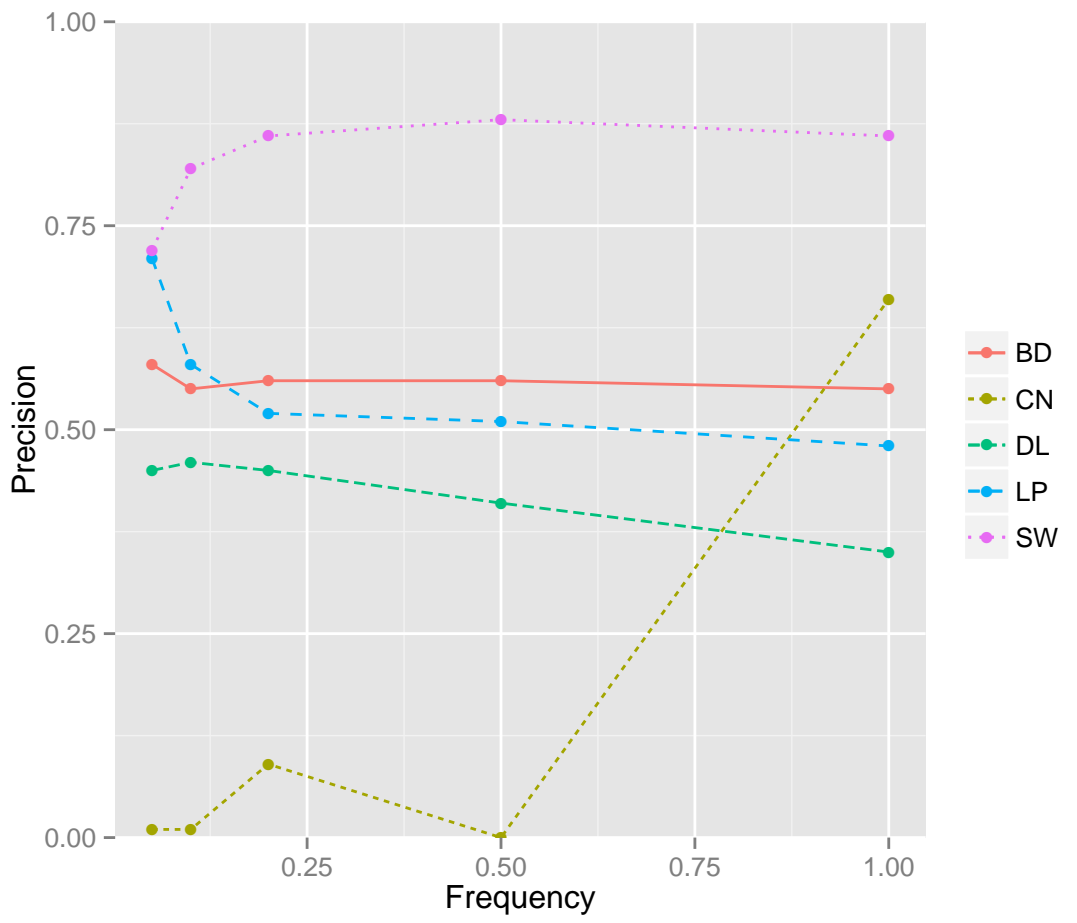

cvf.fin:Accuracy, Precision and Sensitivity for fin vs coverage (c)

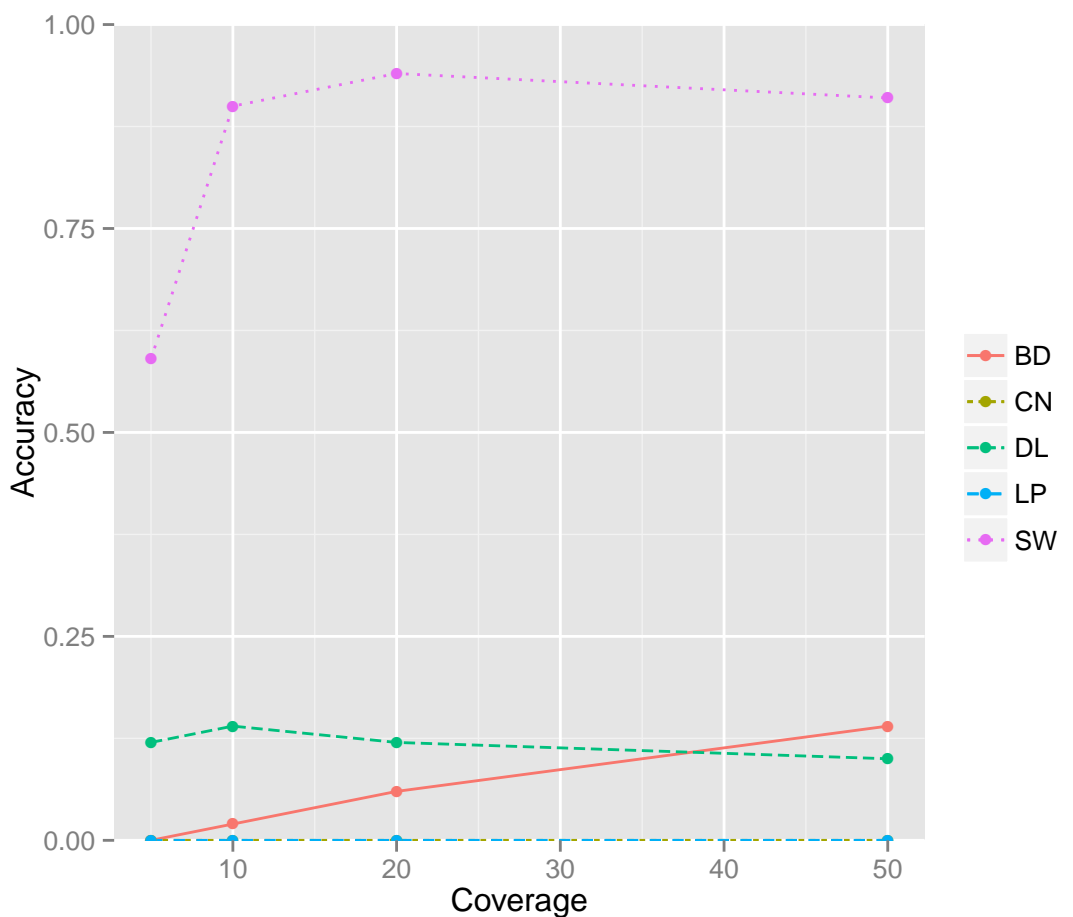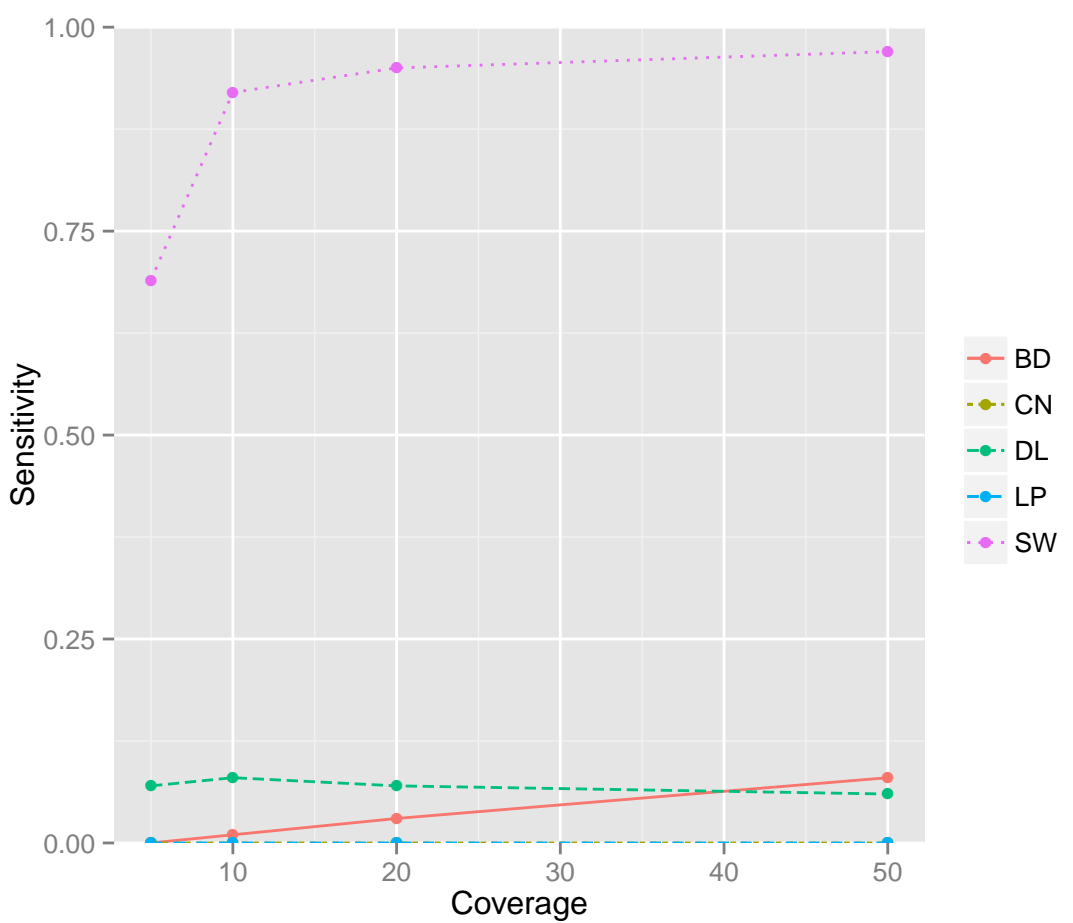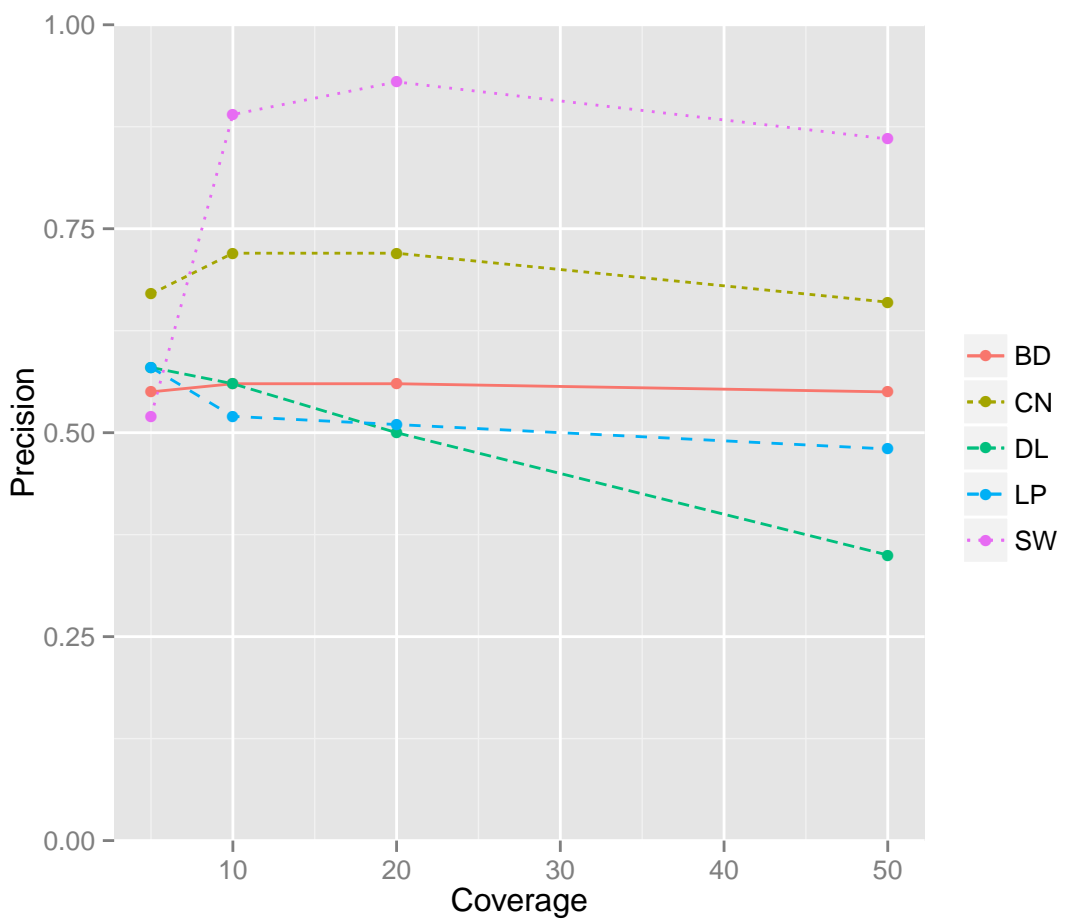

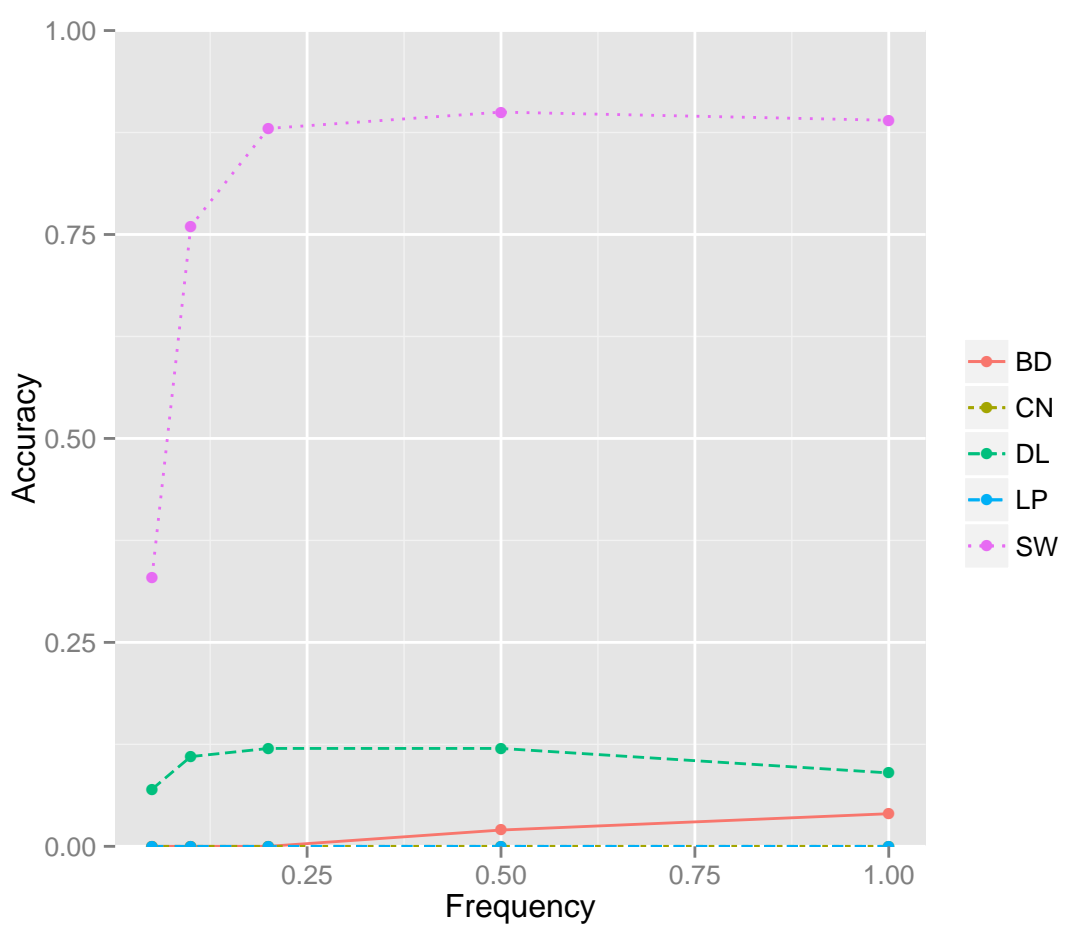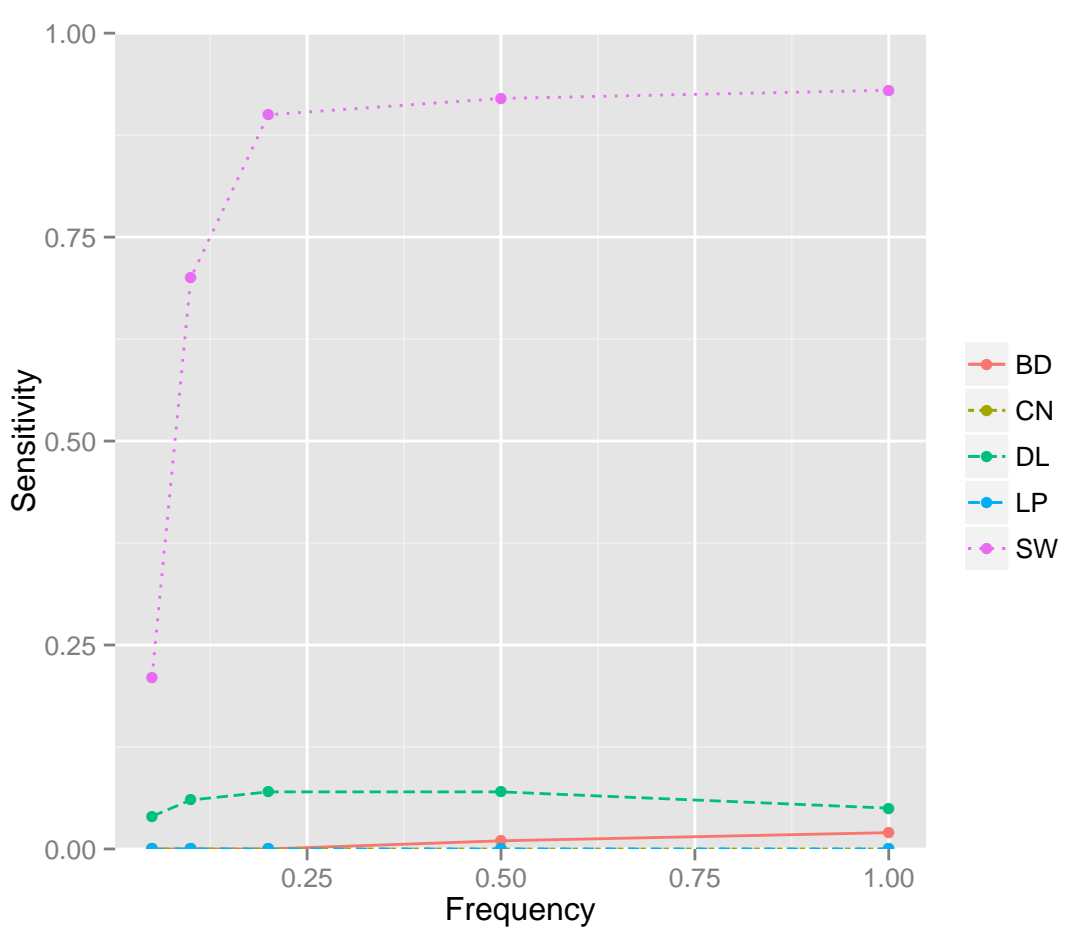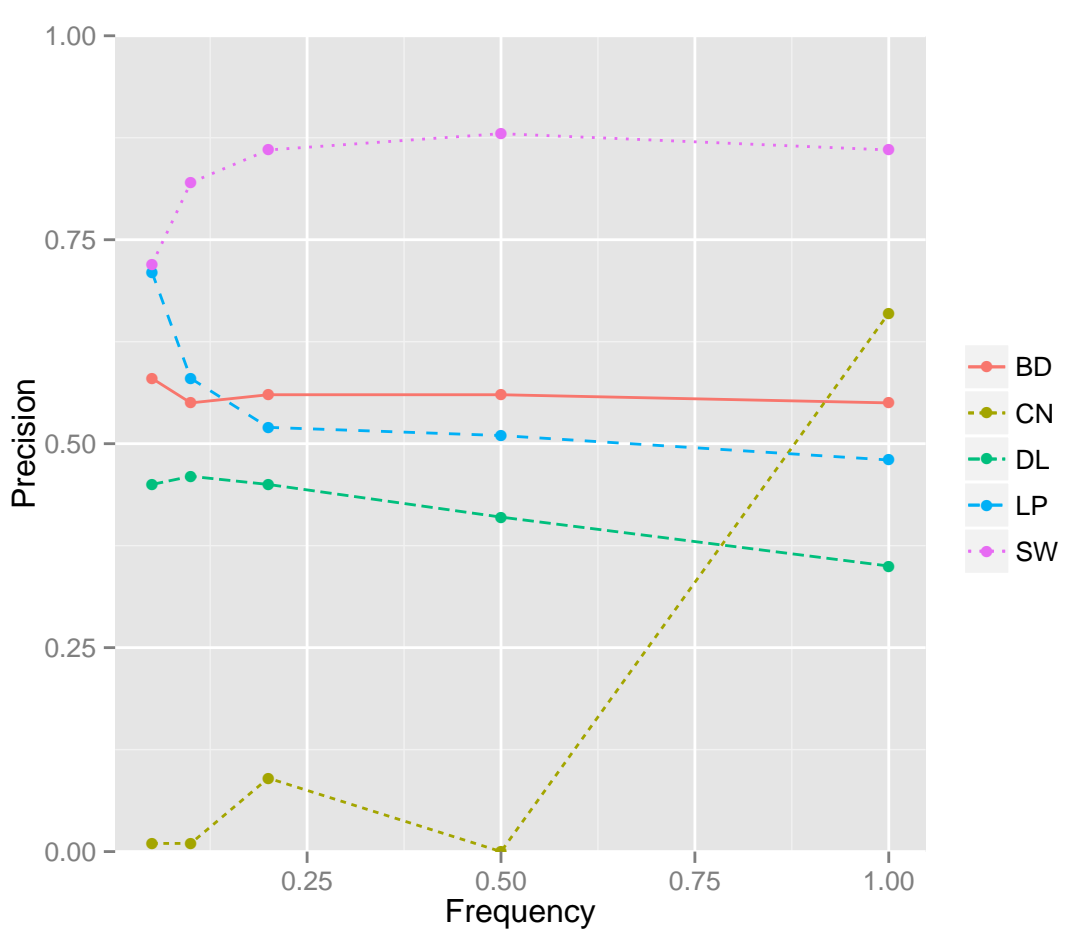

cvg.din:Accuracy, Precision and Sensitivity for din vs coverage (c)

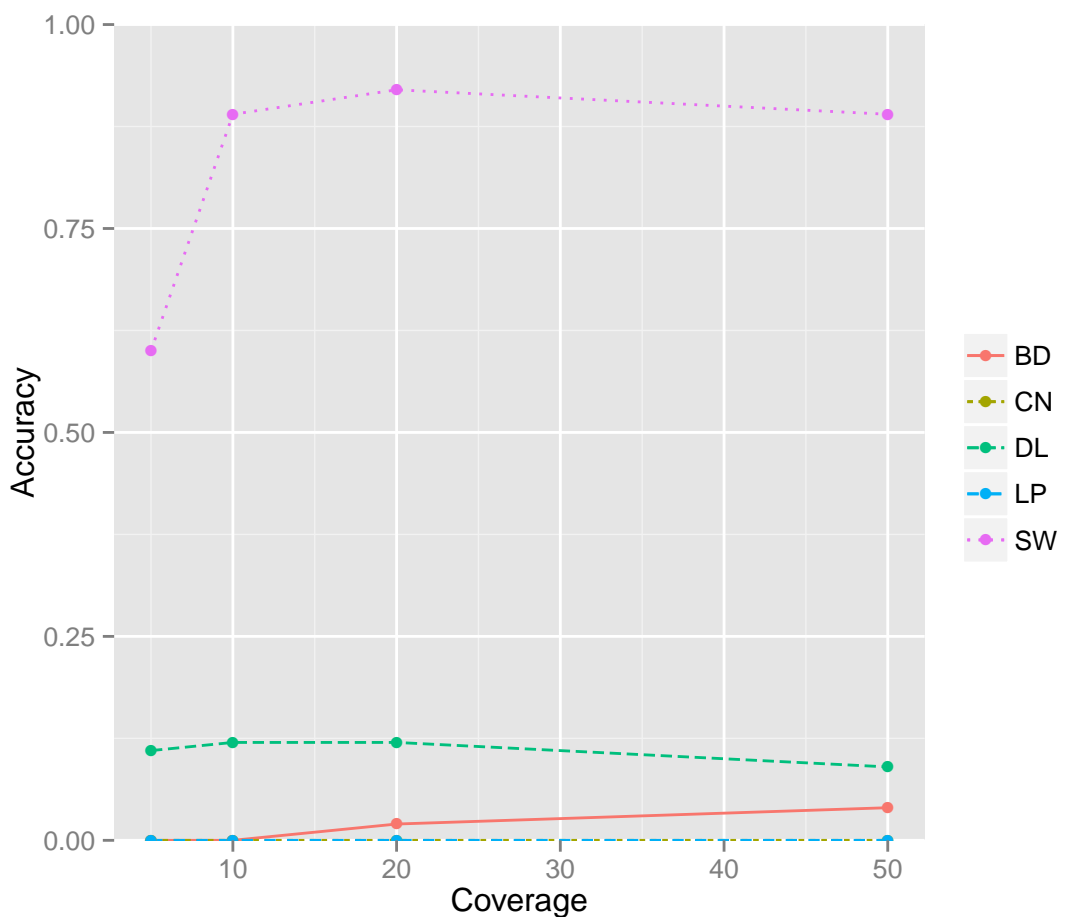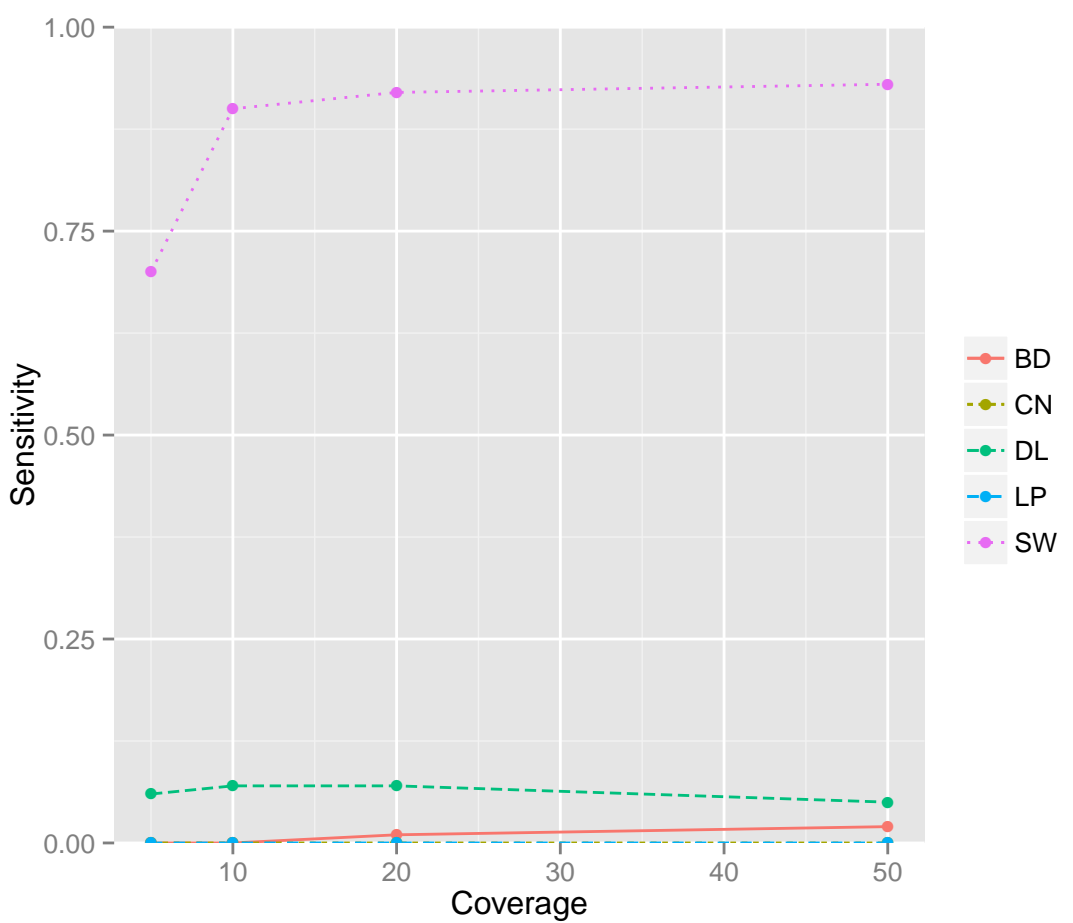



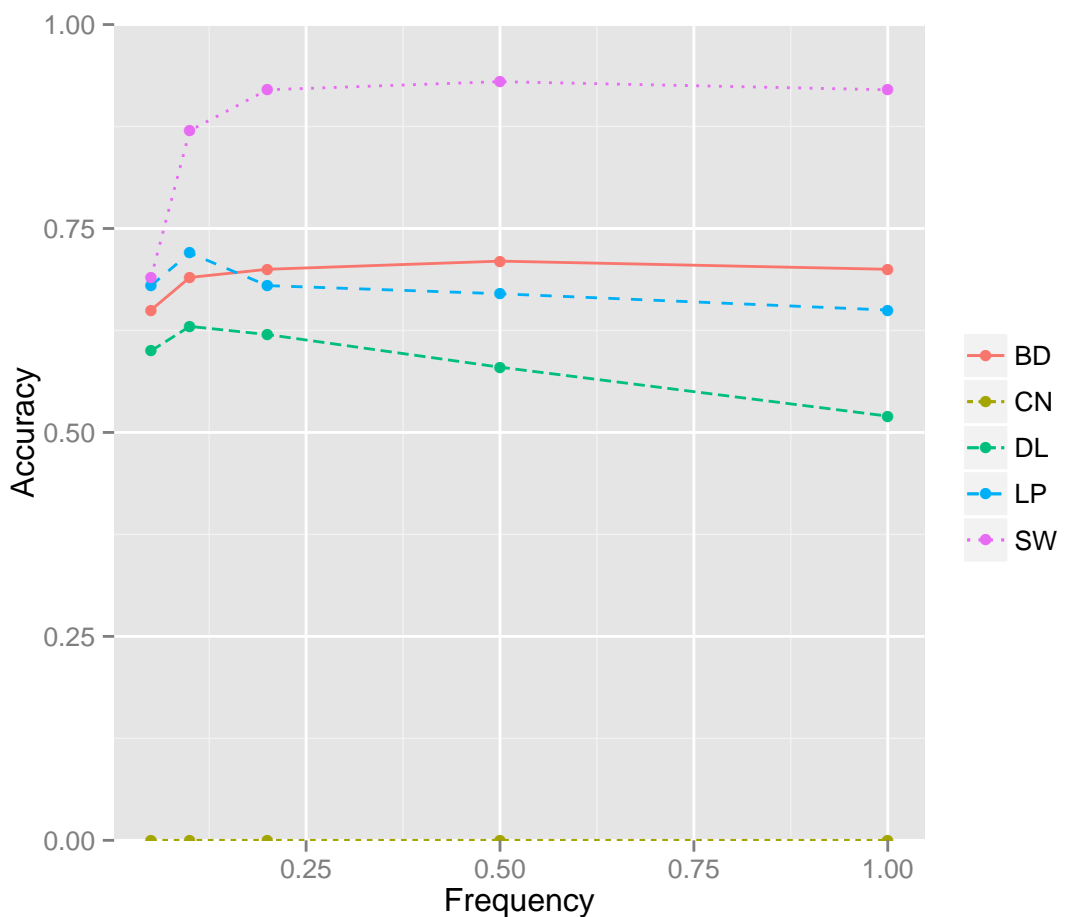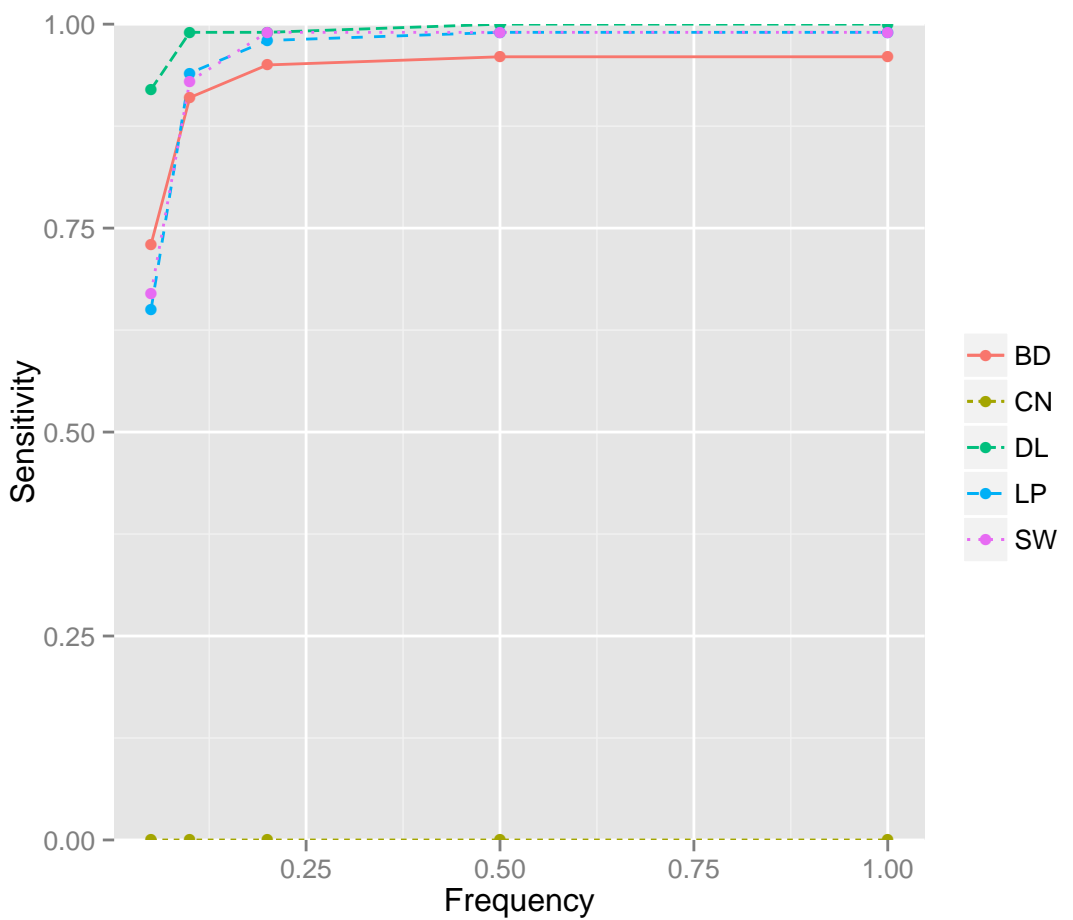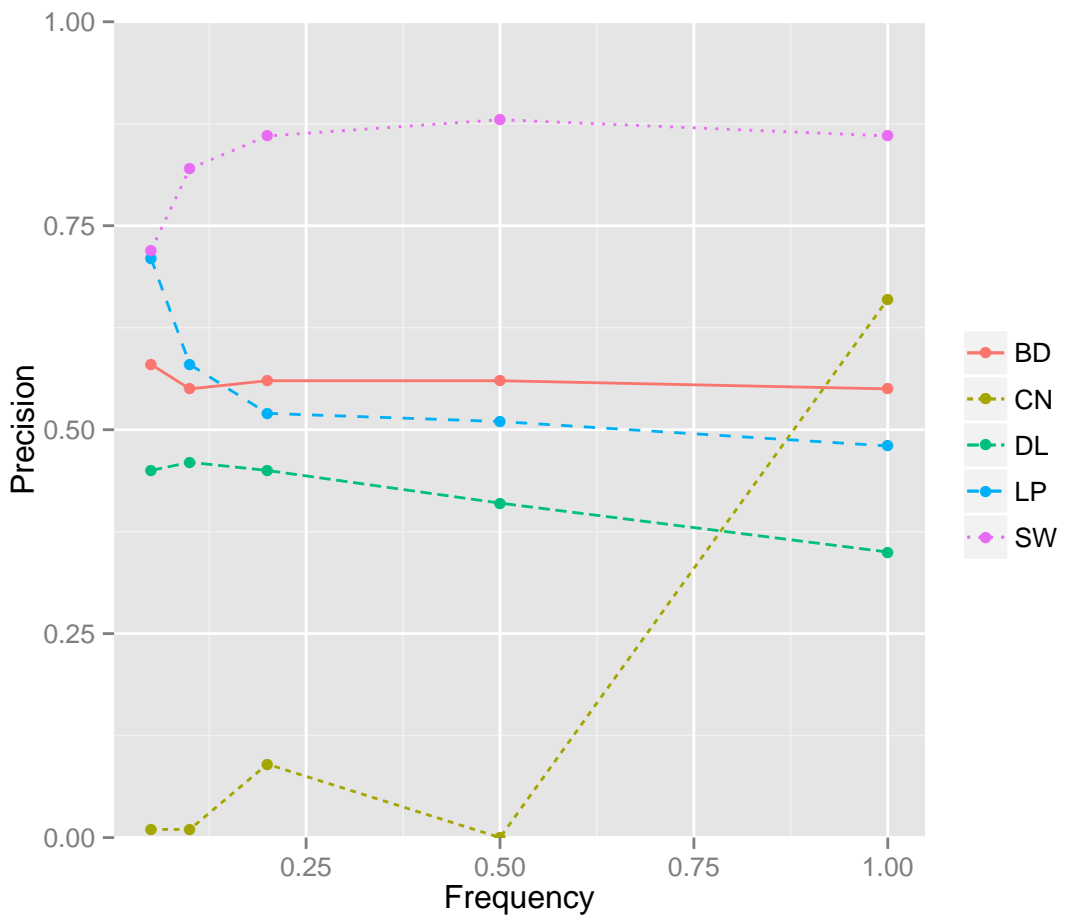

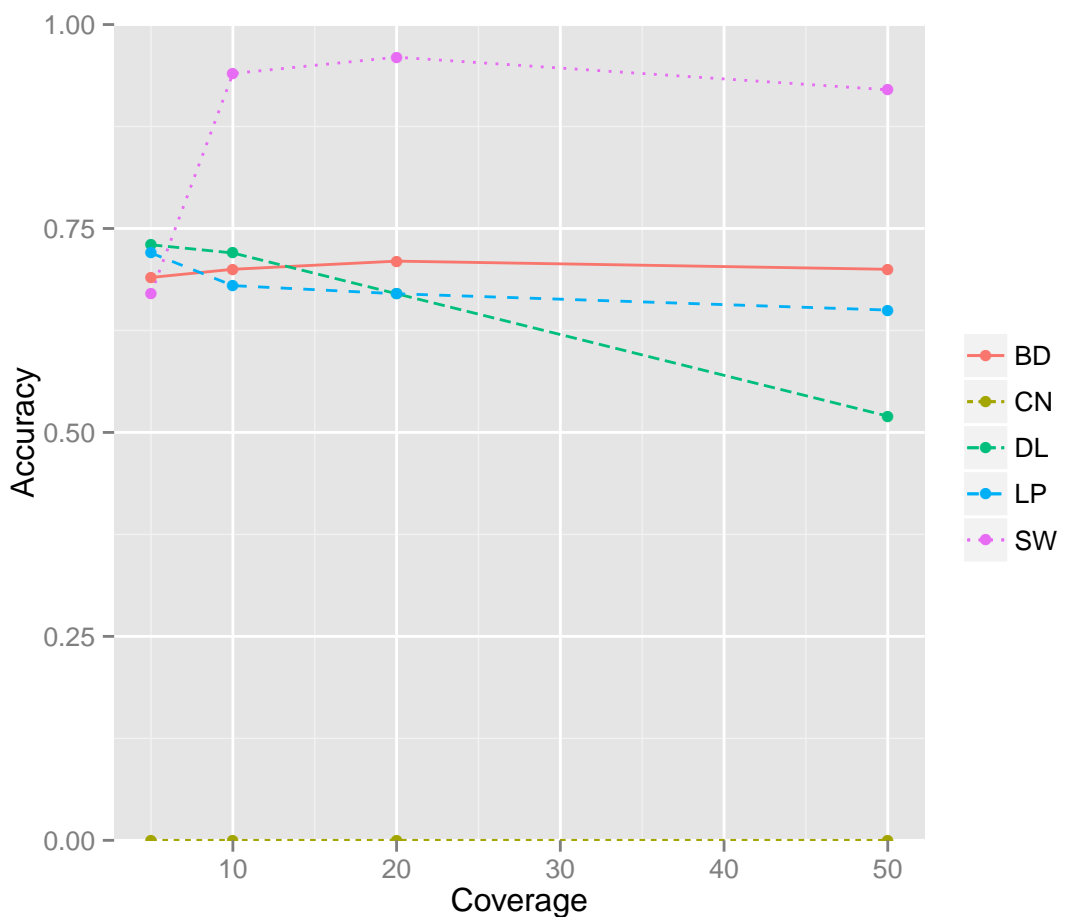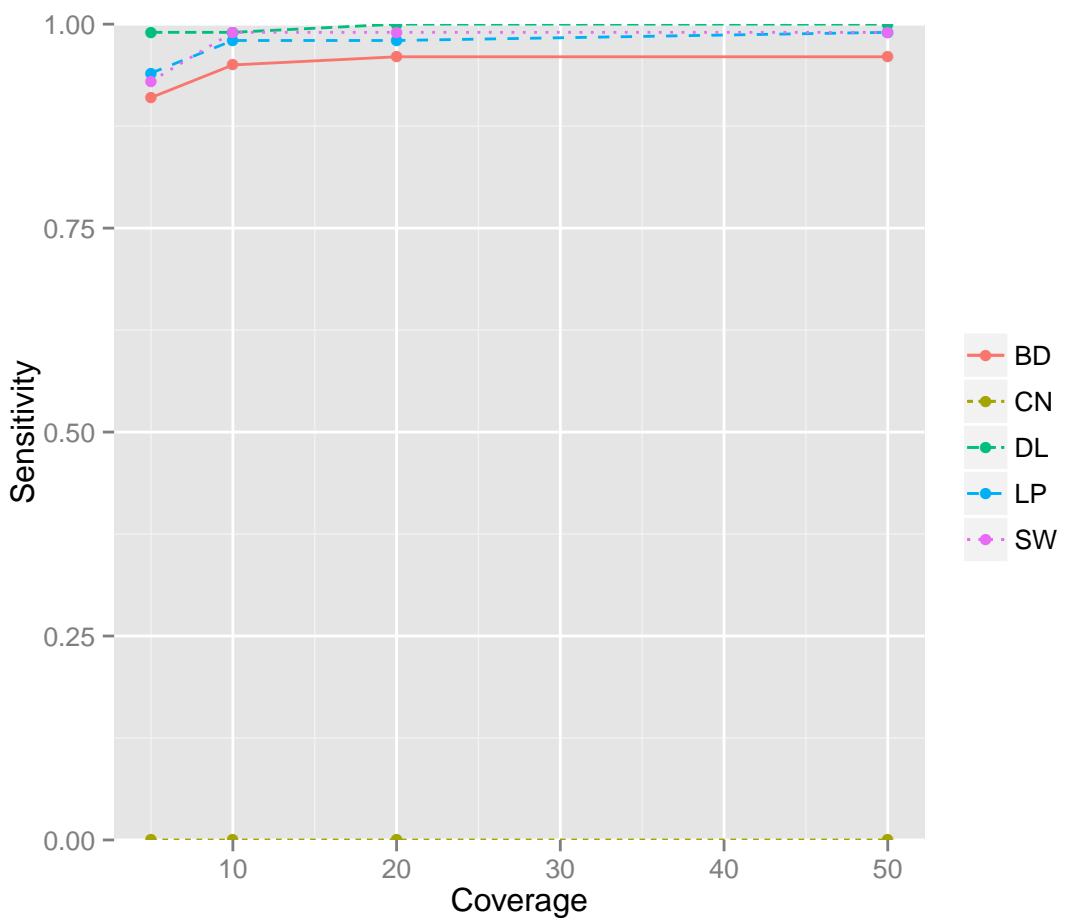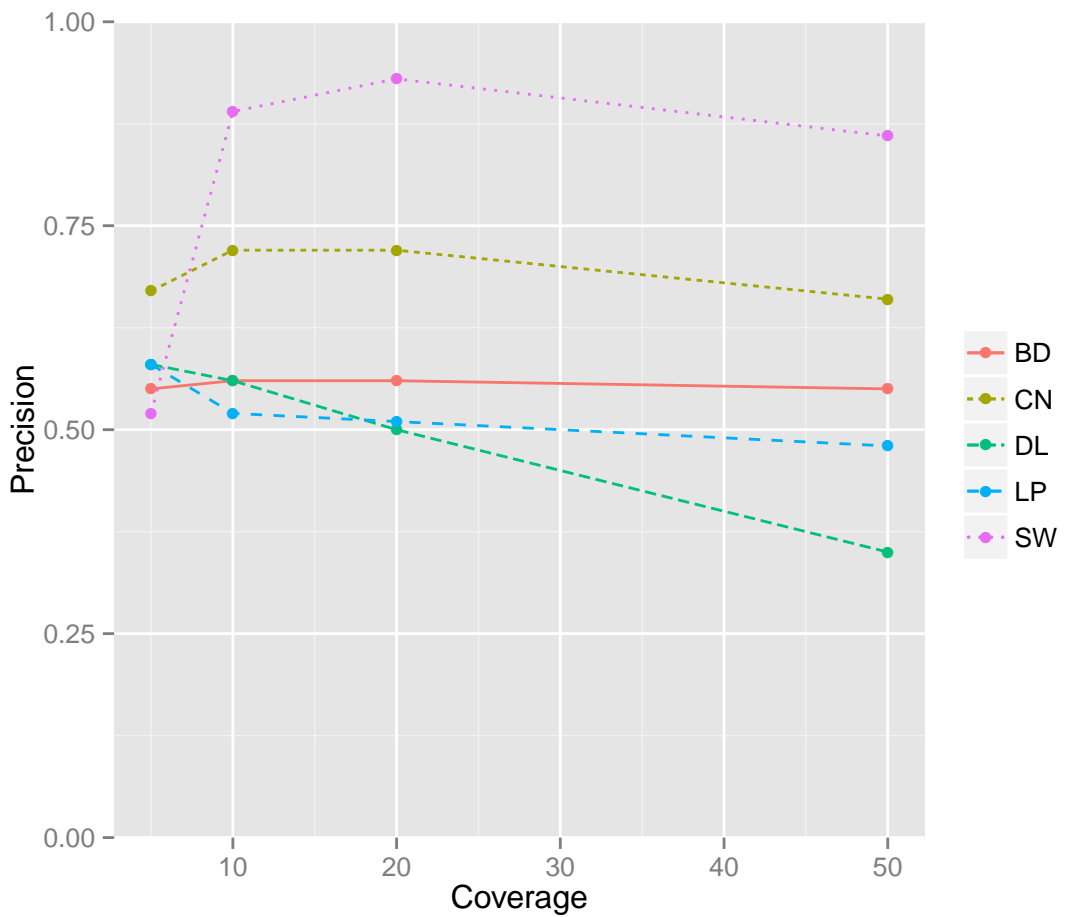

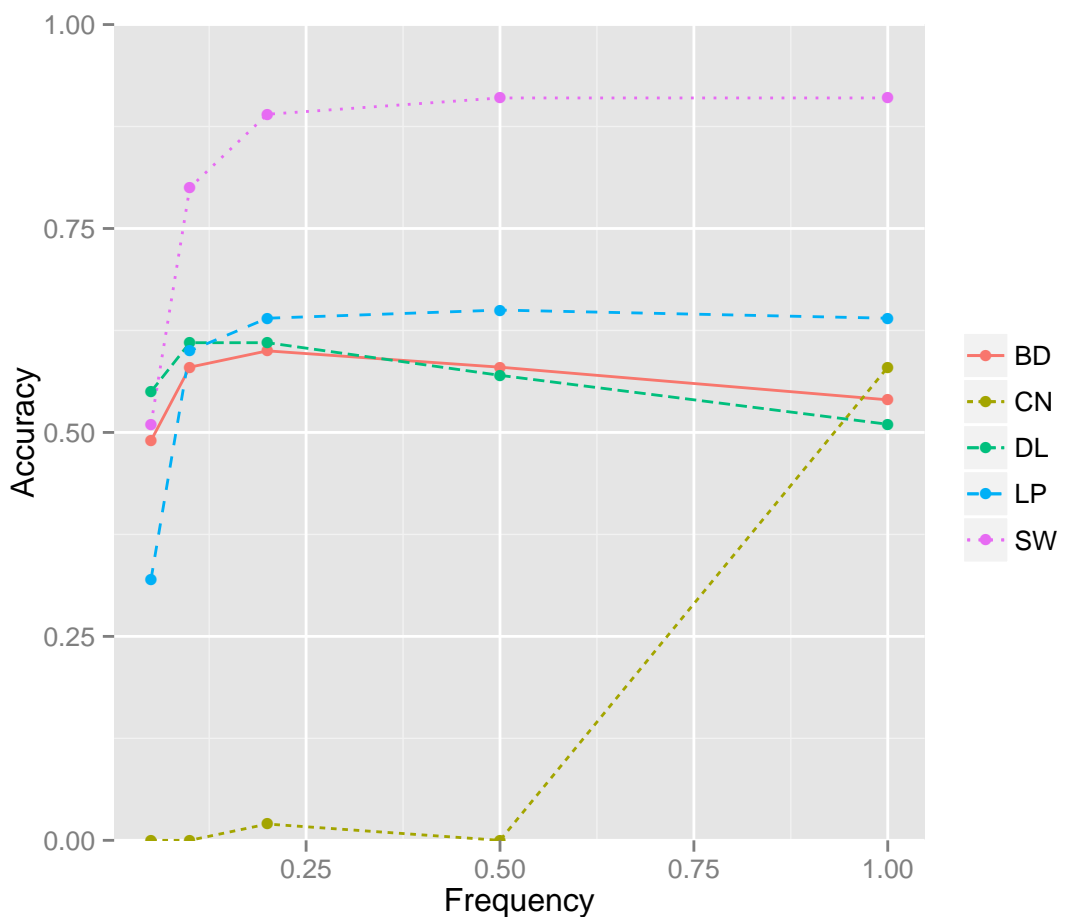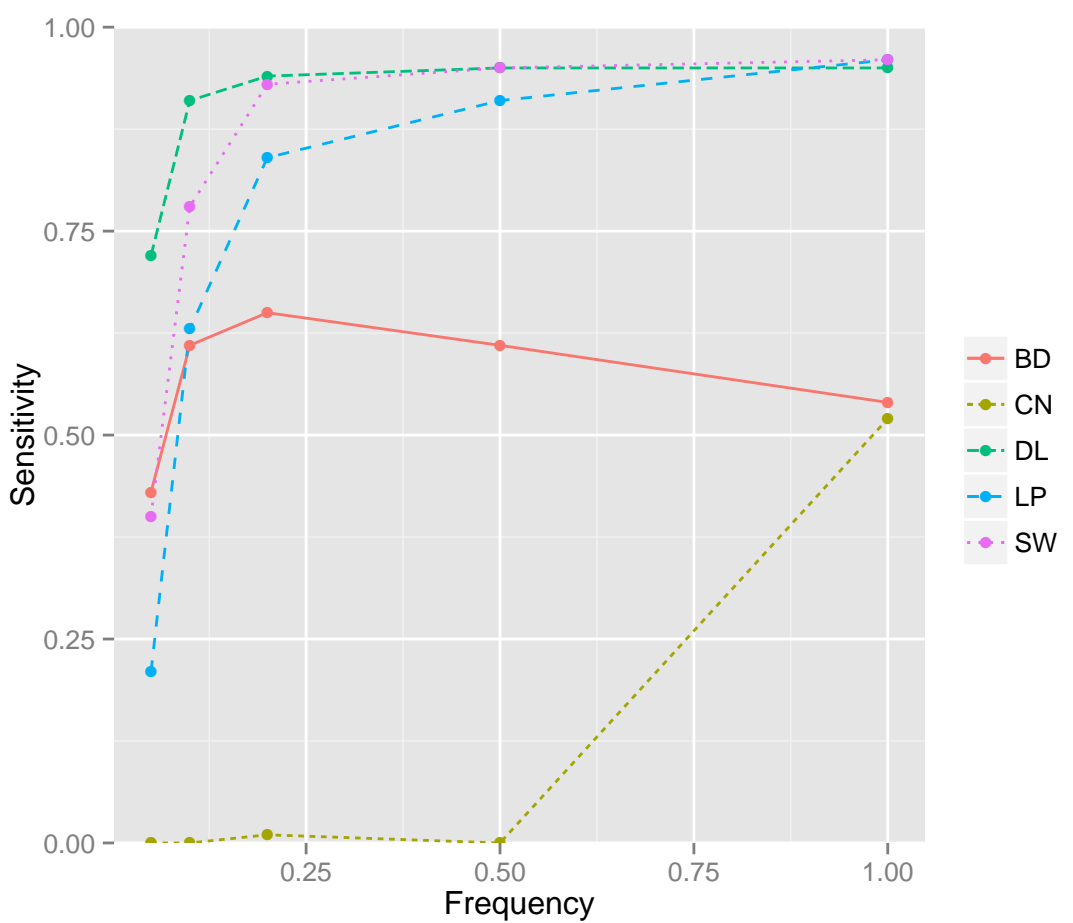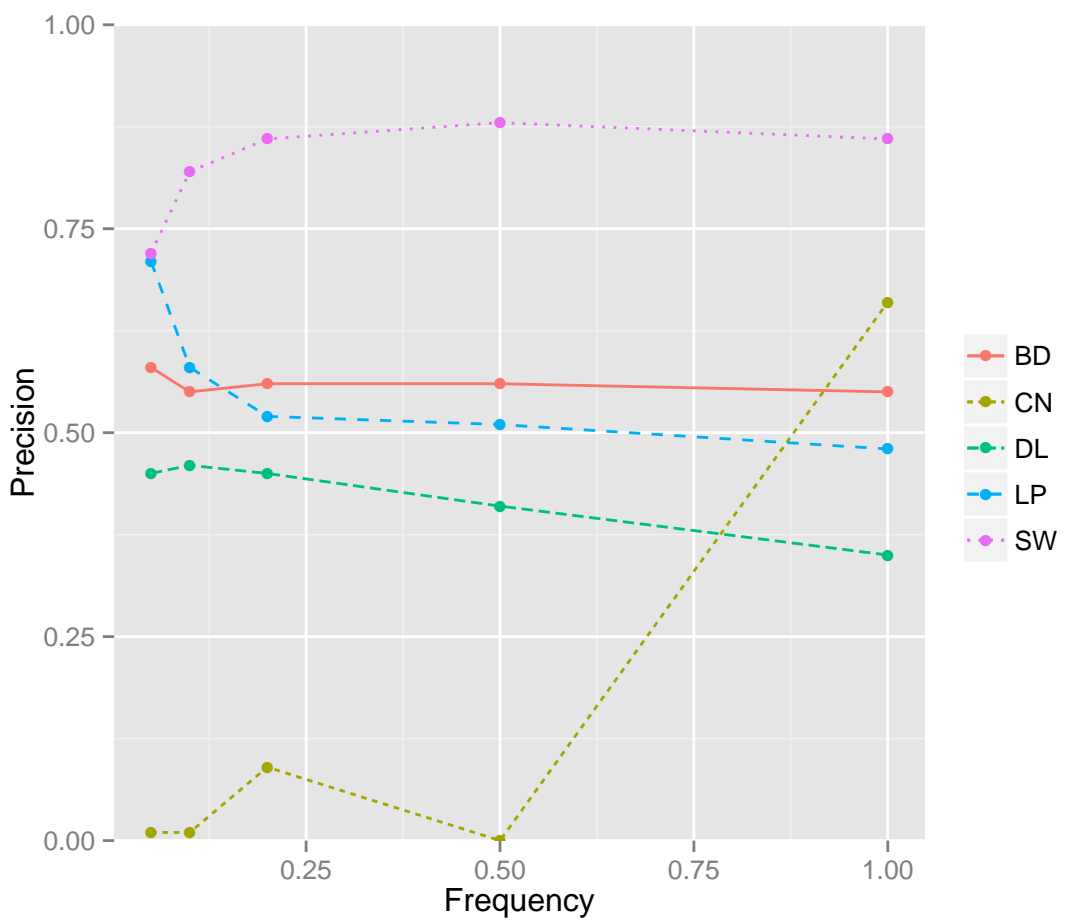

cvg.dup:Accuracy, Precision and Sensitivity for dup vs coverage (c)

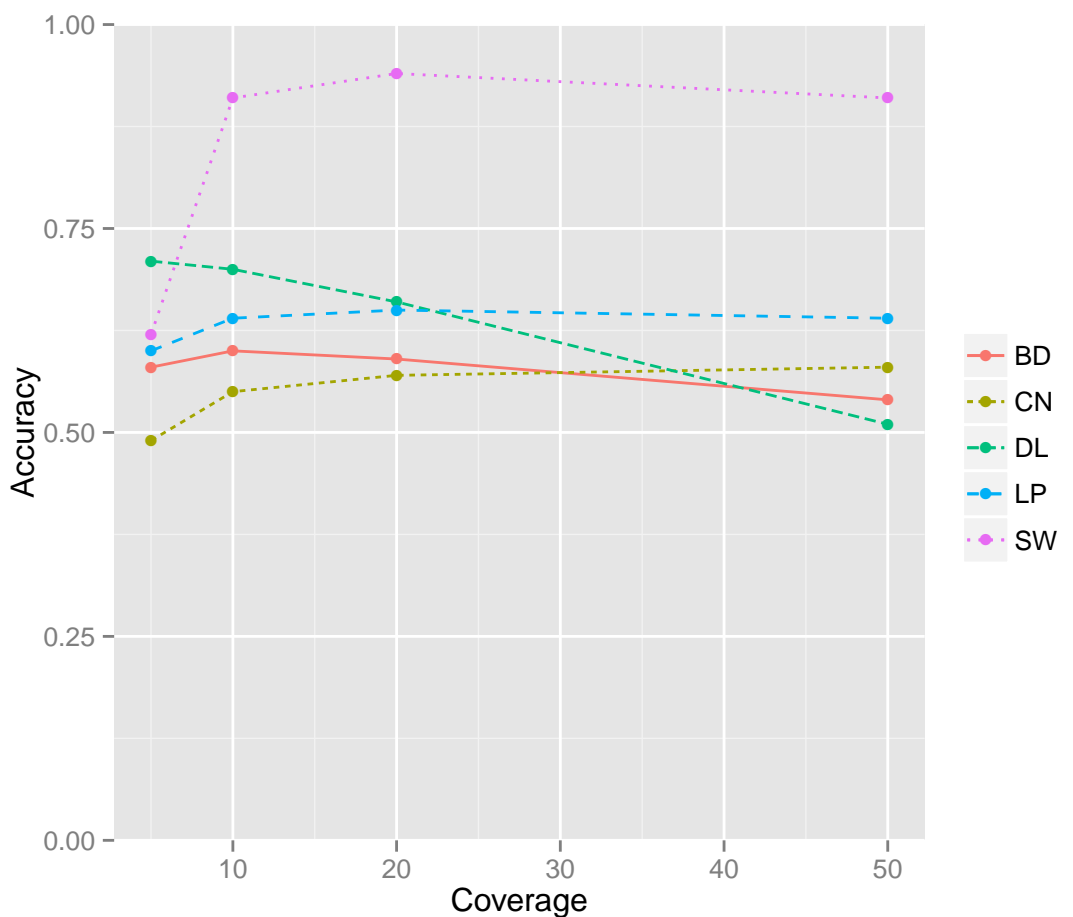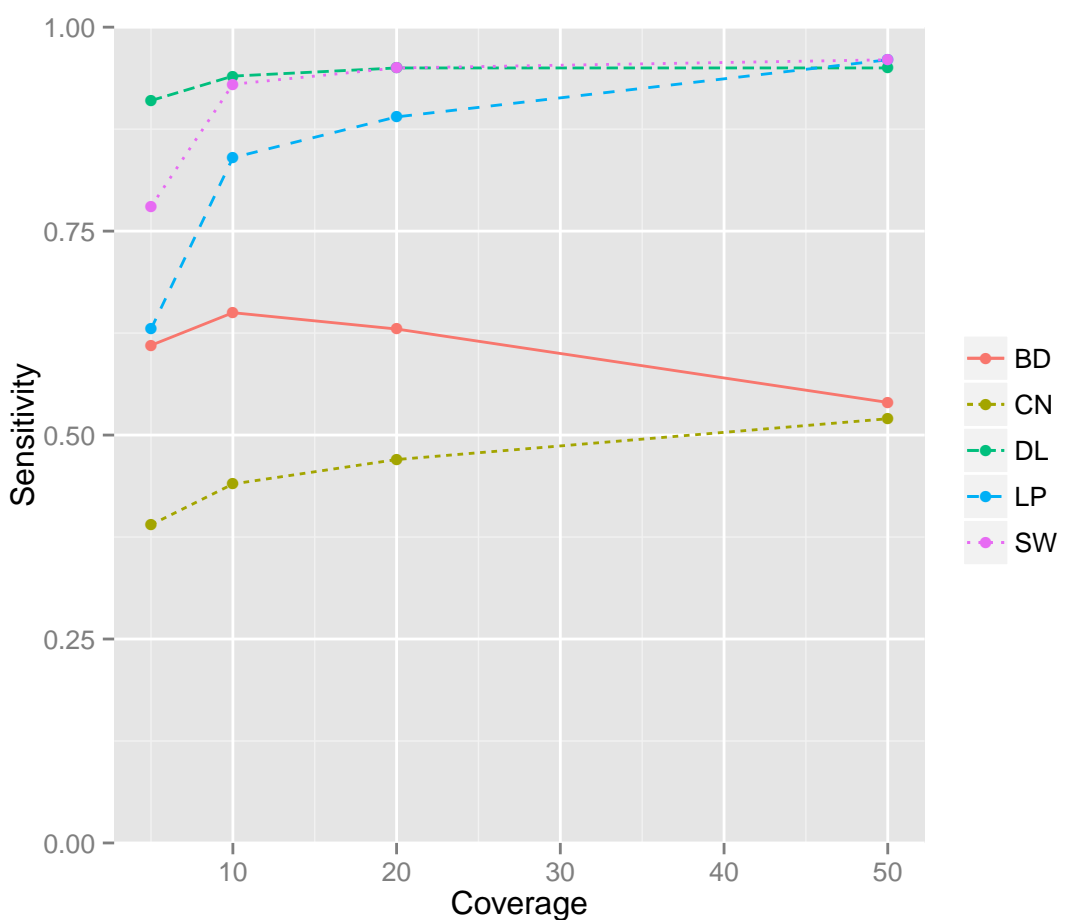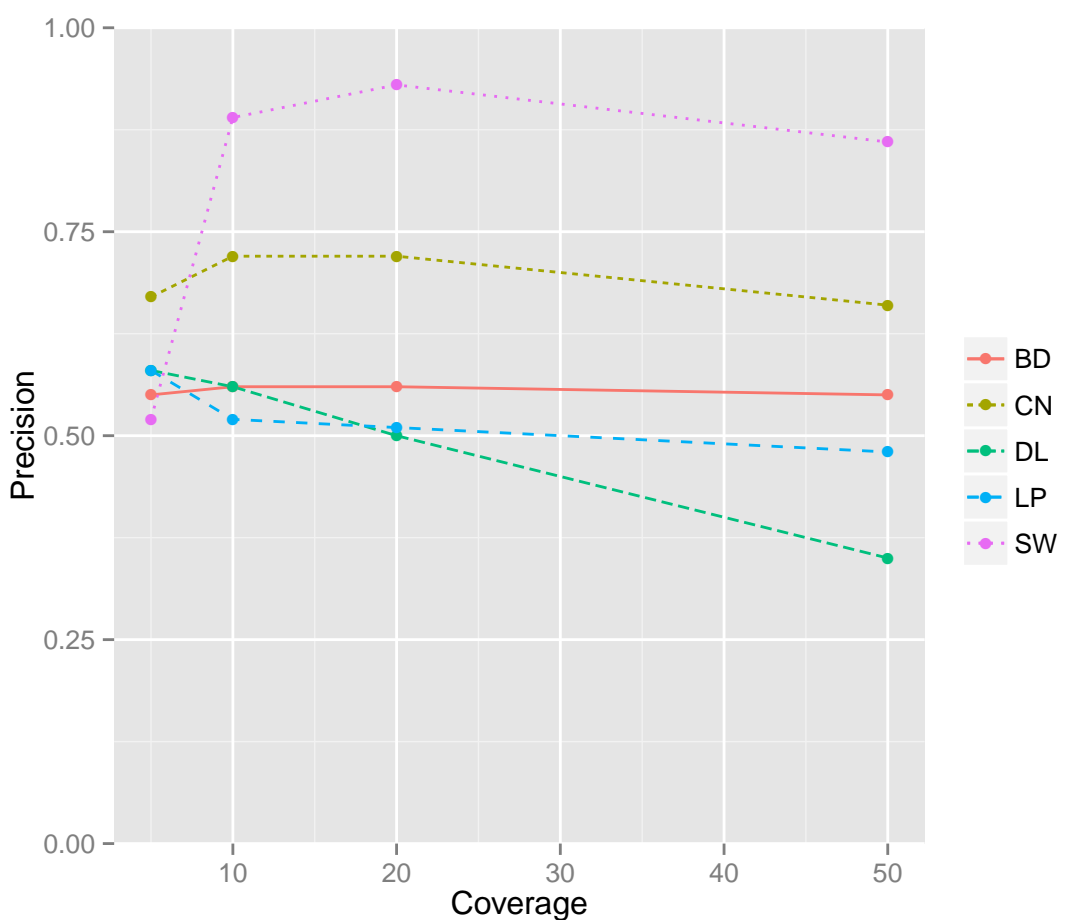

pur.trd:Accuracy, Precision and Sensitivity for trd vs Frequency

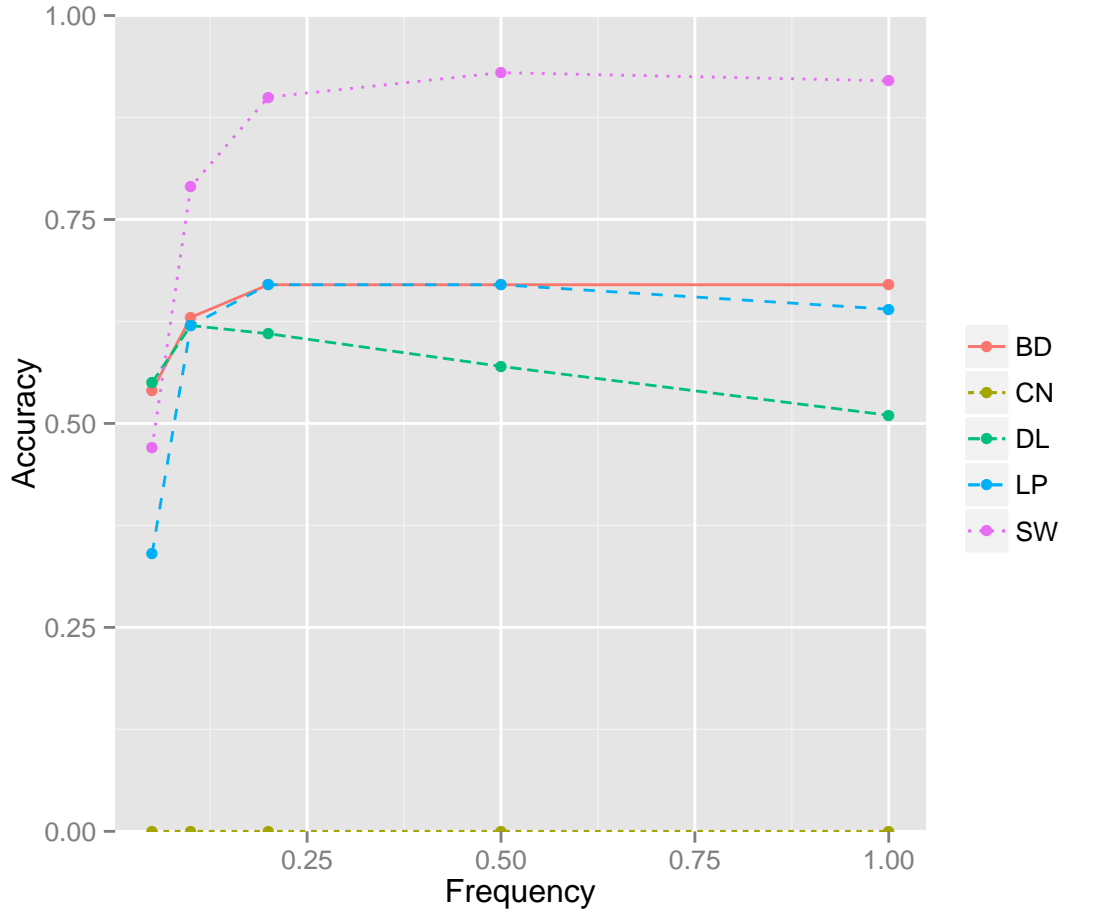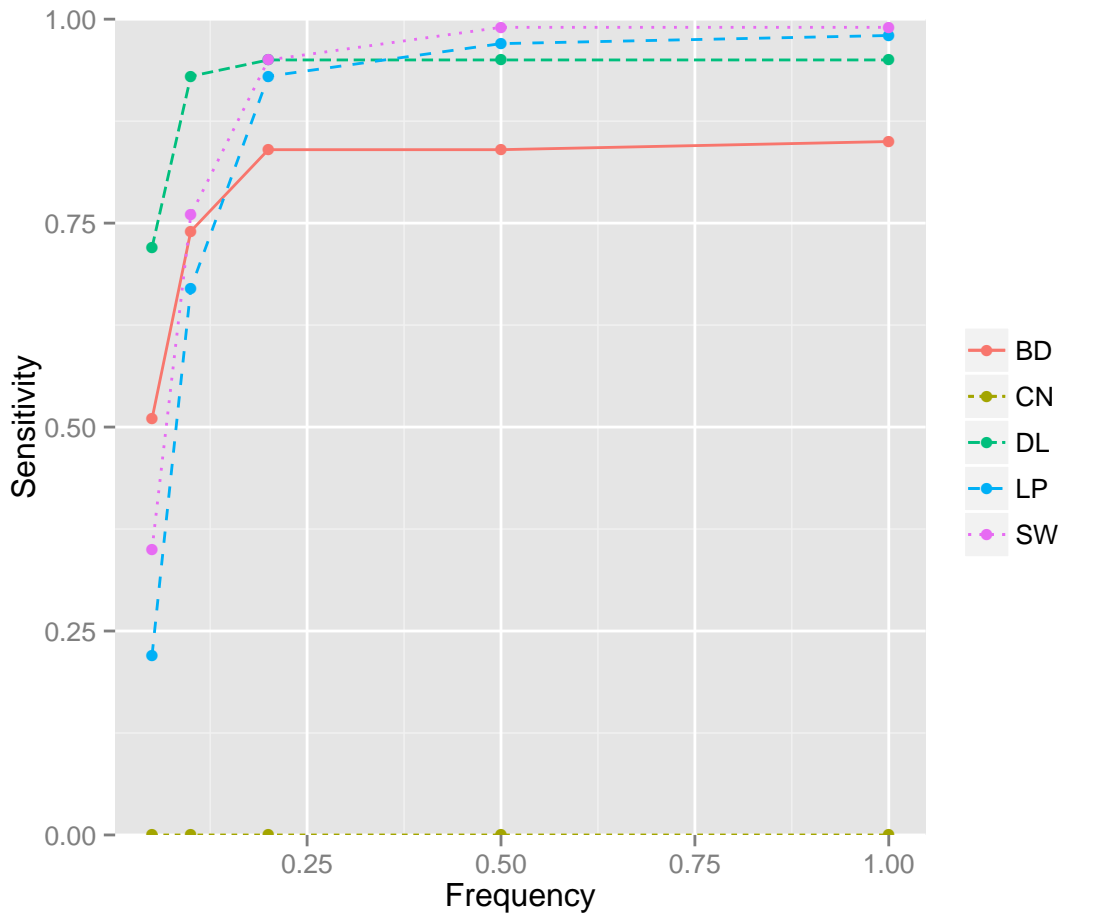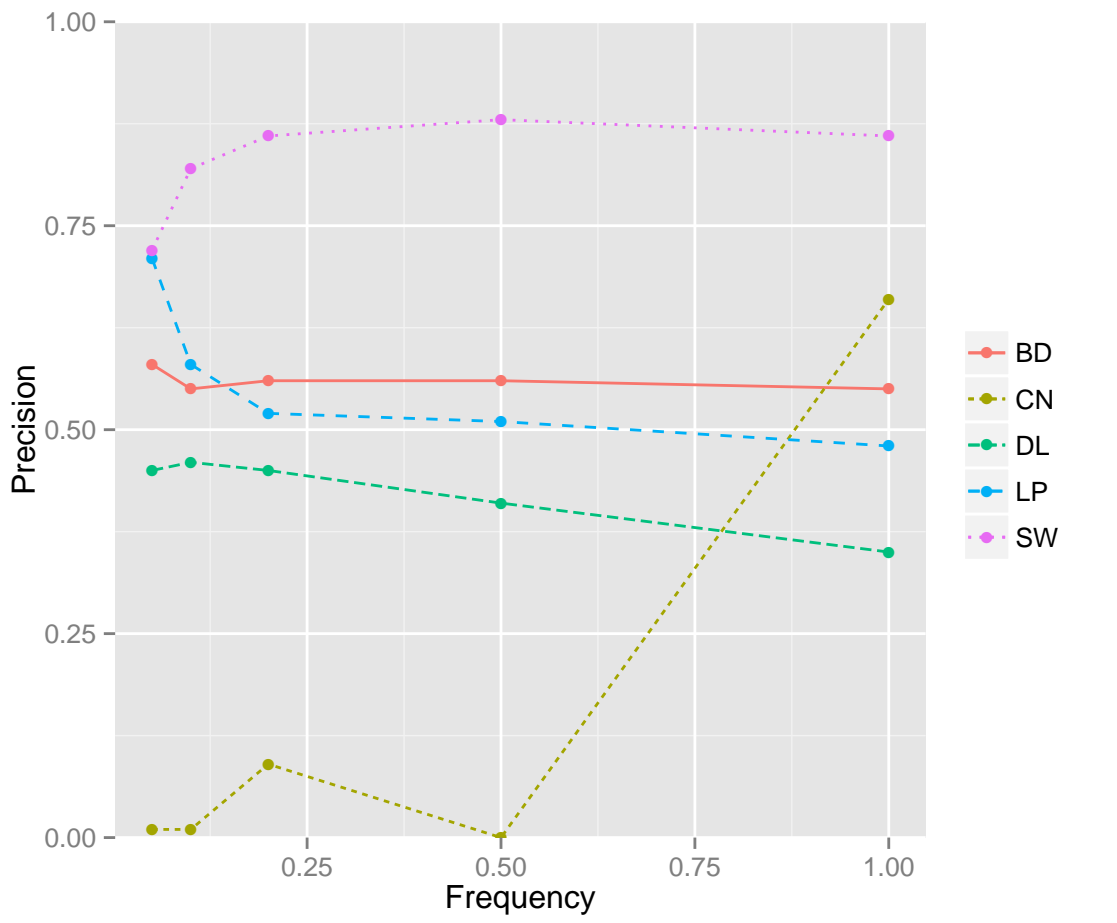

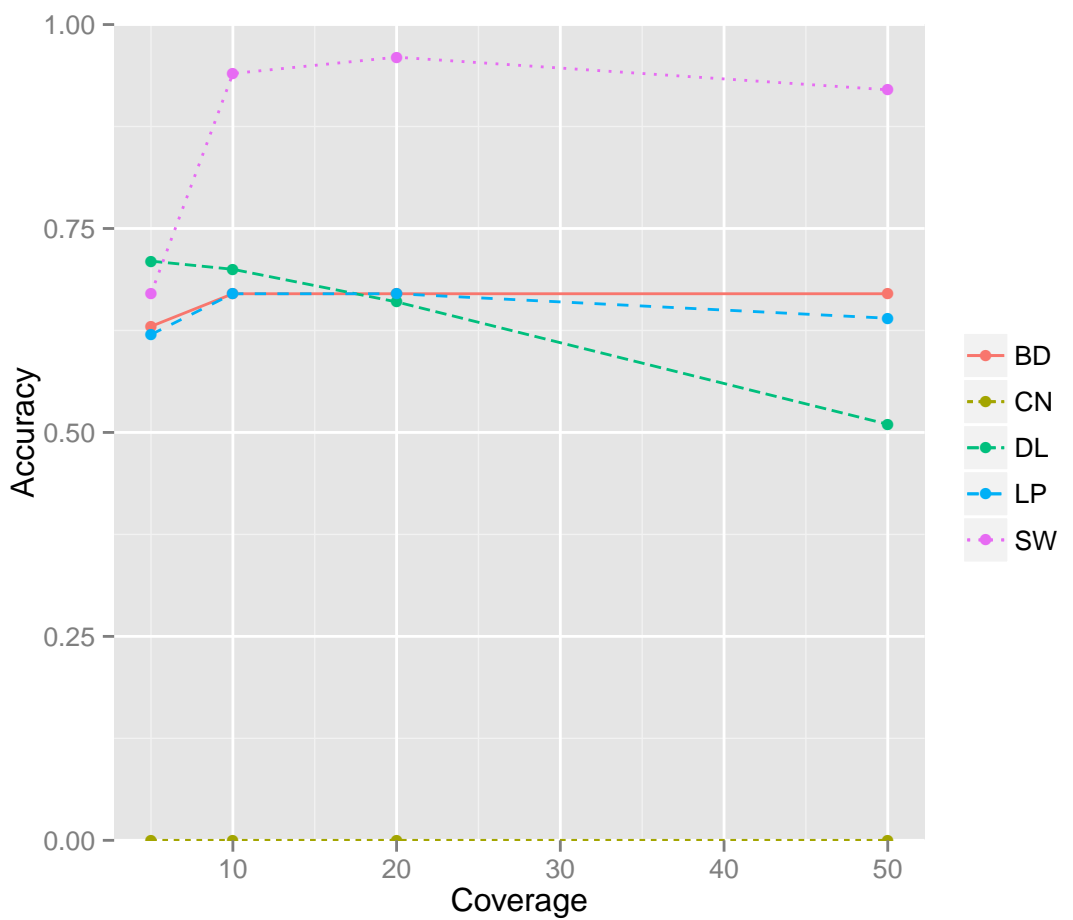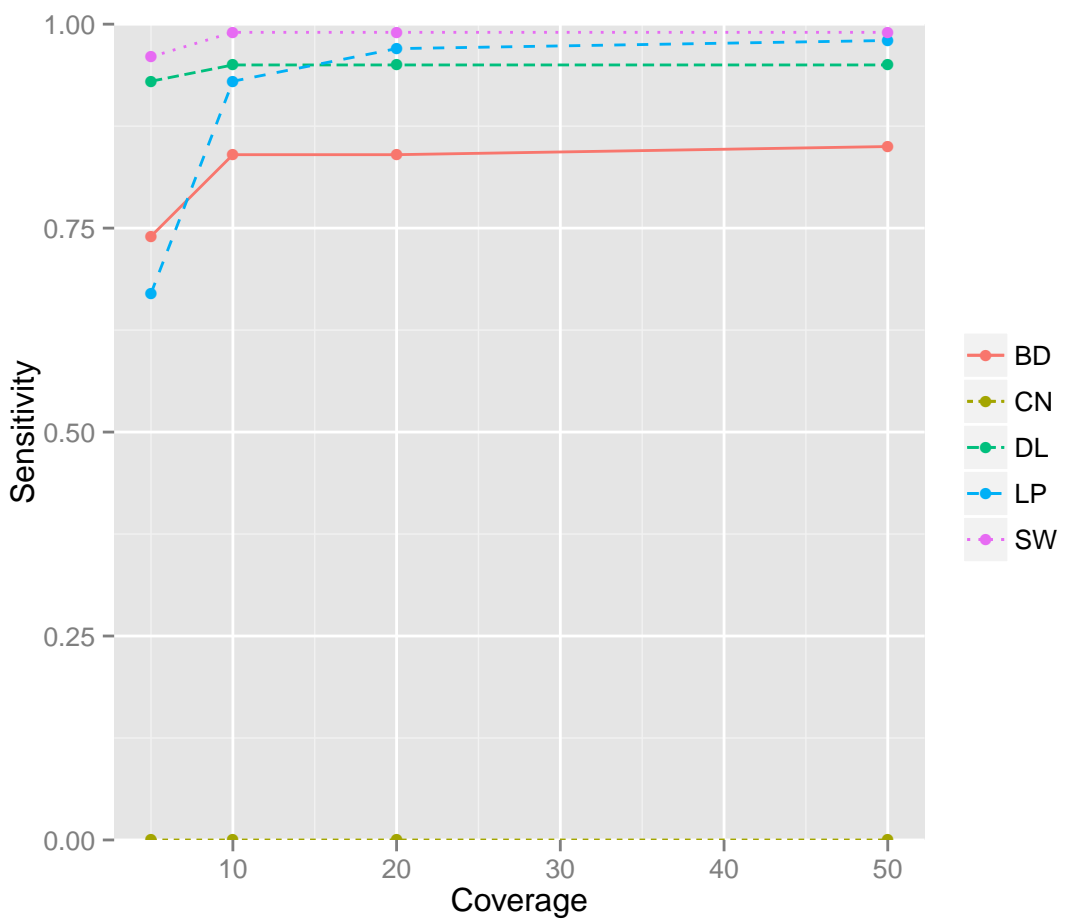

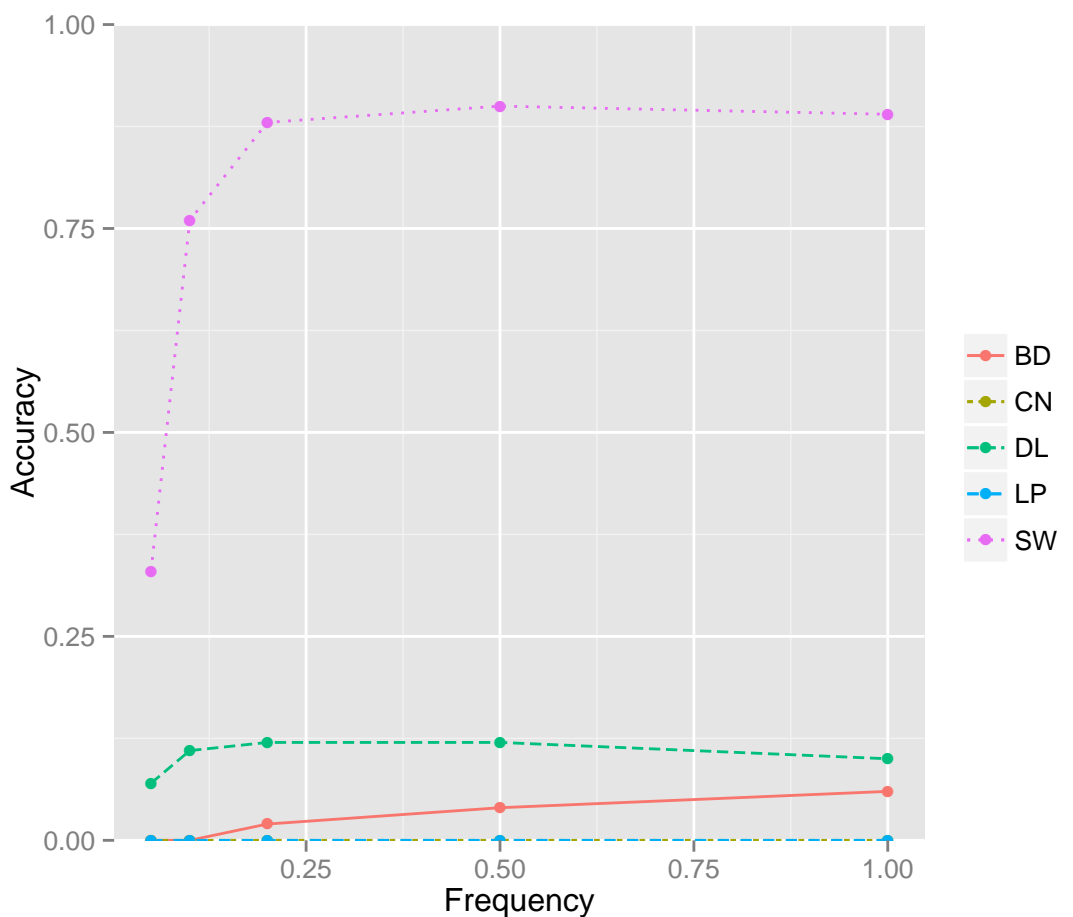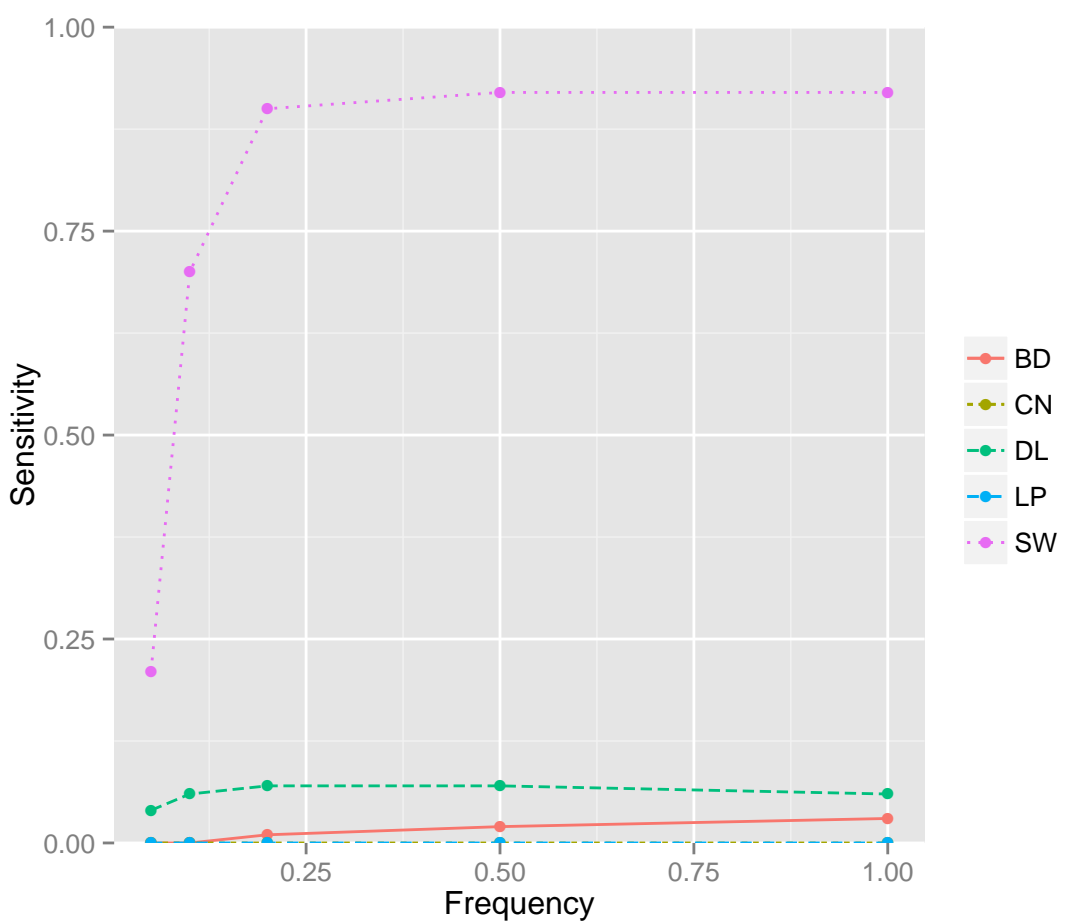

cvg.tri:Accuracy, Precision and Sensitivity for tri vs coverage (c)

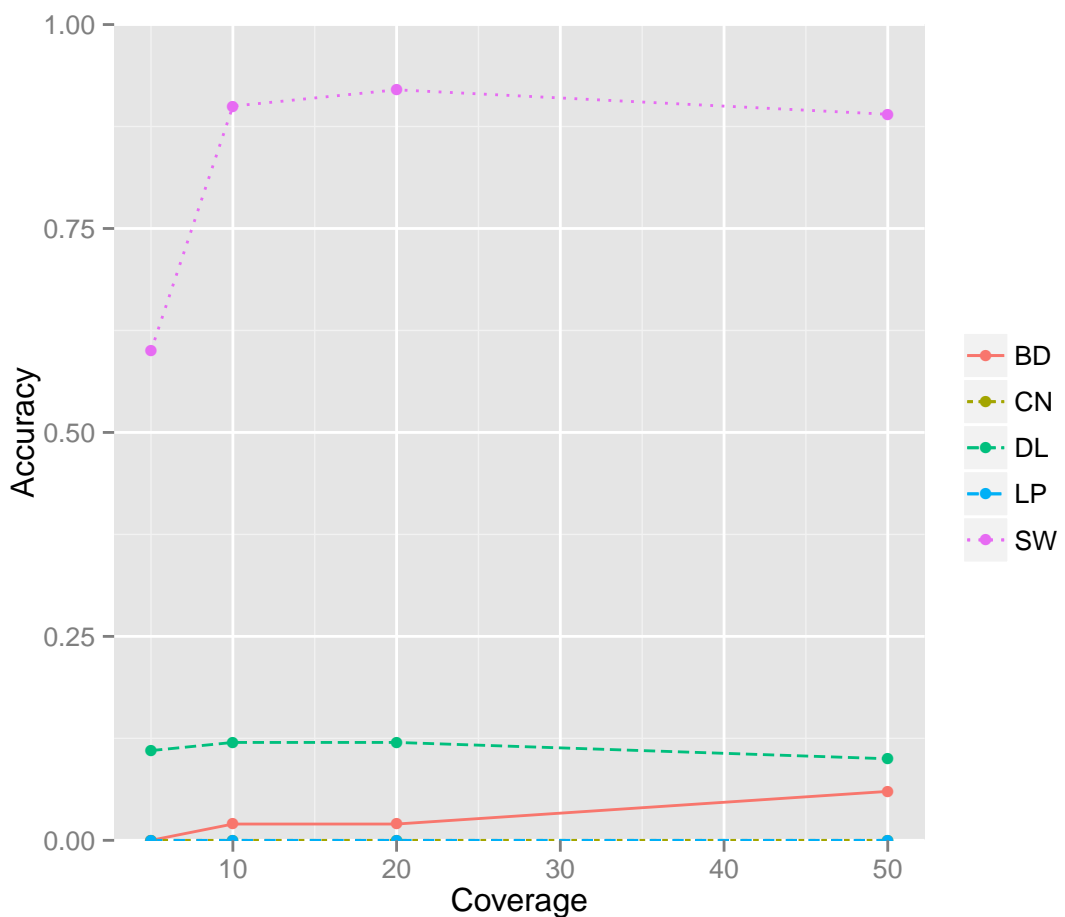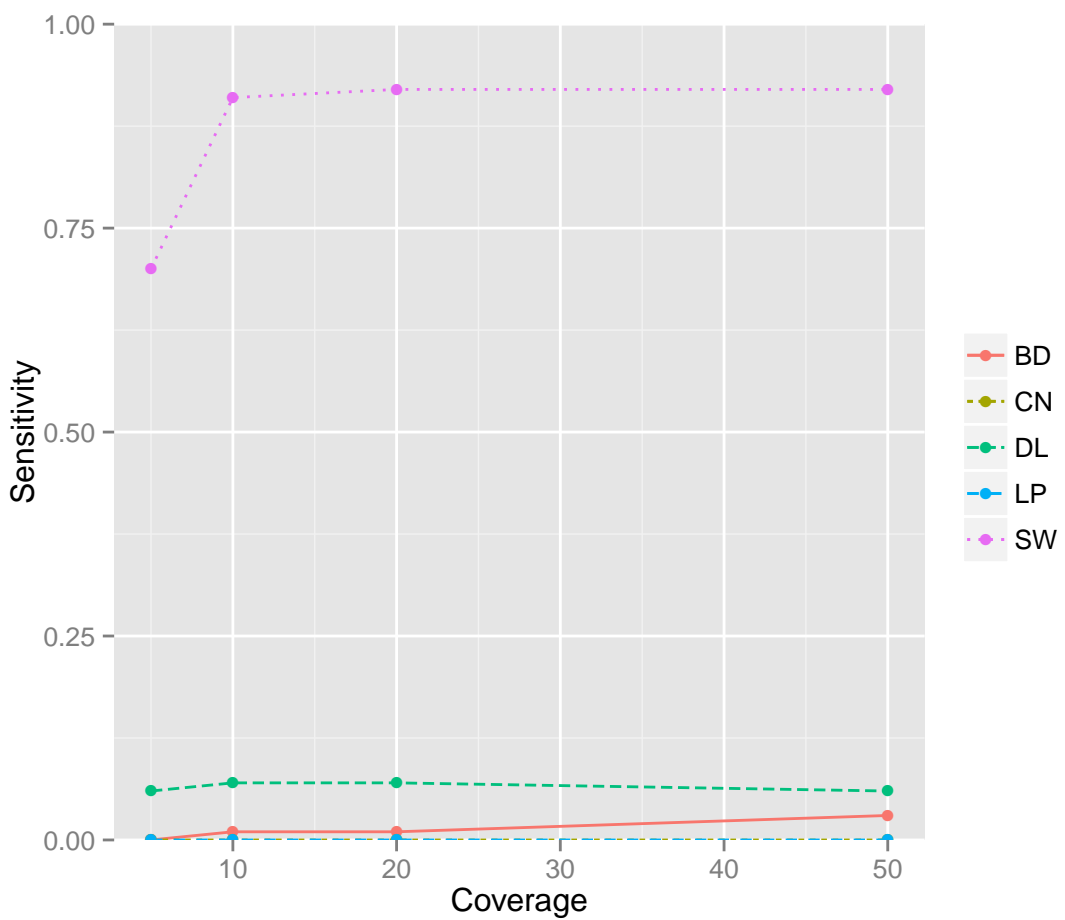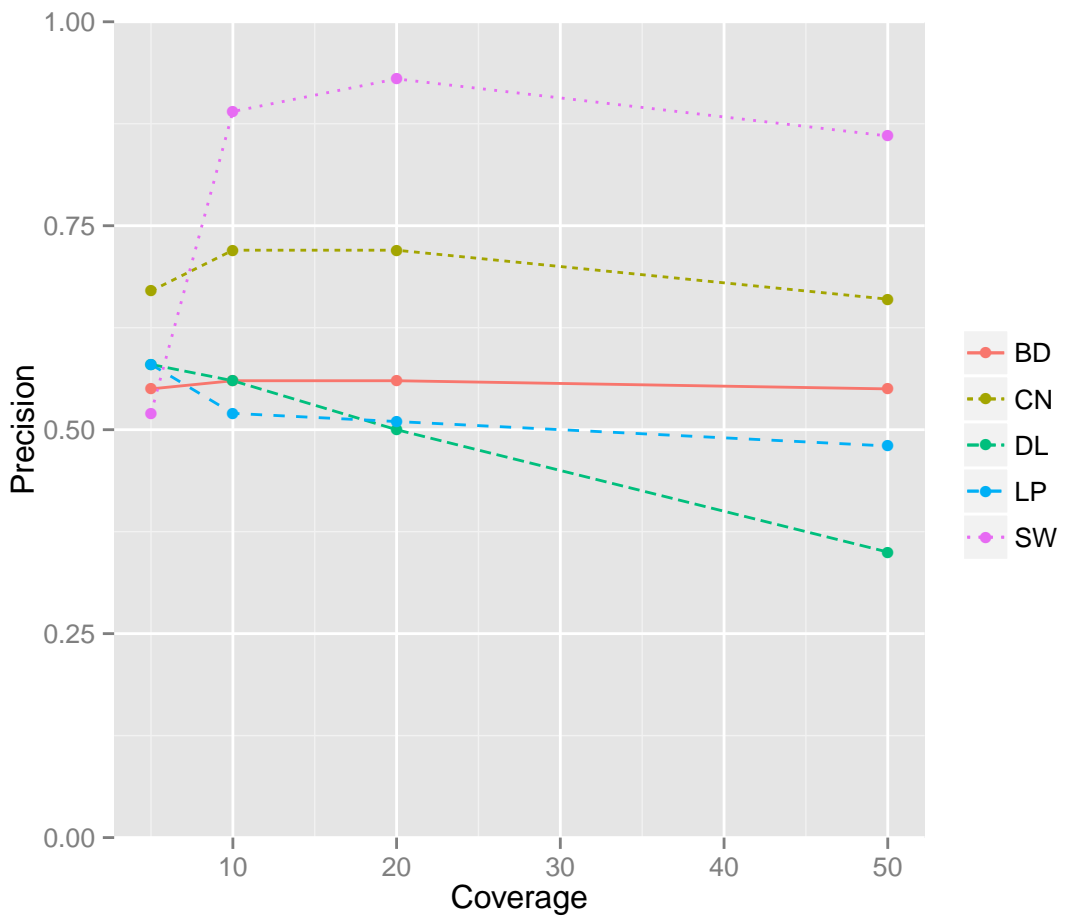

Supplement: supp_gkw481_nar-00967-met-n-2016-File008.pdf [file supp_gkw481_nar-00967-met-n-2016-File008.pdf]
