# Supplementary figures and images for: A genome-wide approach for detecting novel insertion-deletion variants of mid-range size
Source: PubMed Central journal article supplement — Nucleic Acids Res. 2016 Jun 20;44(15):e126. doi: 10.1093/nar/gkw481 (PMC5009736; doi:10.1093/nar/gkw481), 2016-06-20

Transposition = Deletion at donor + Insertion at recipient

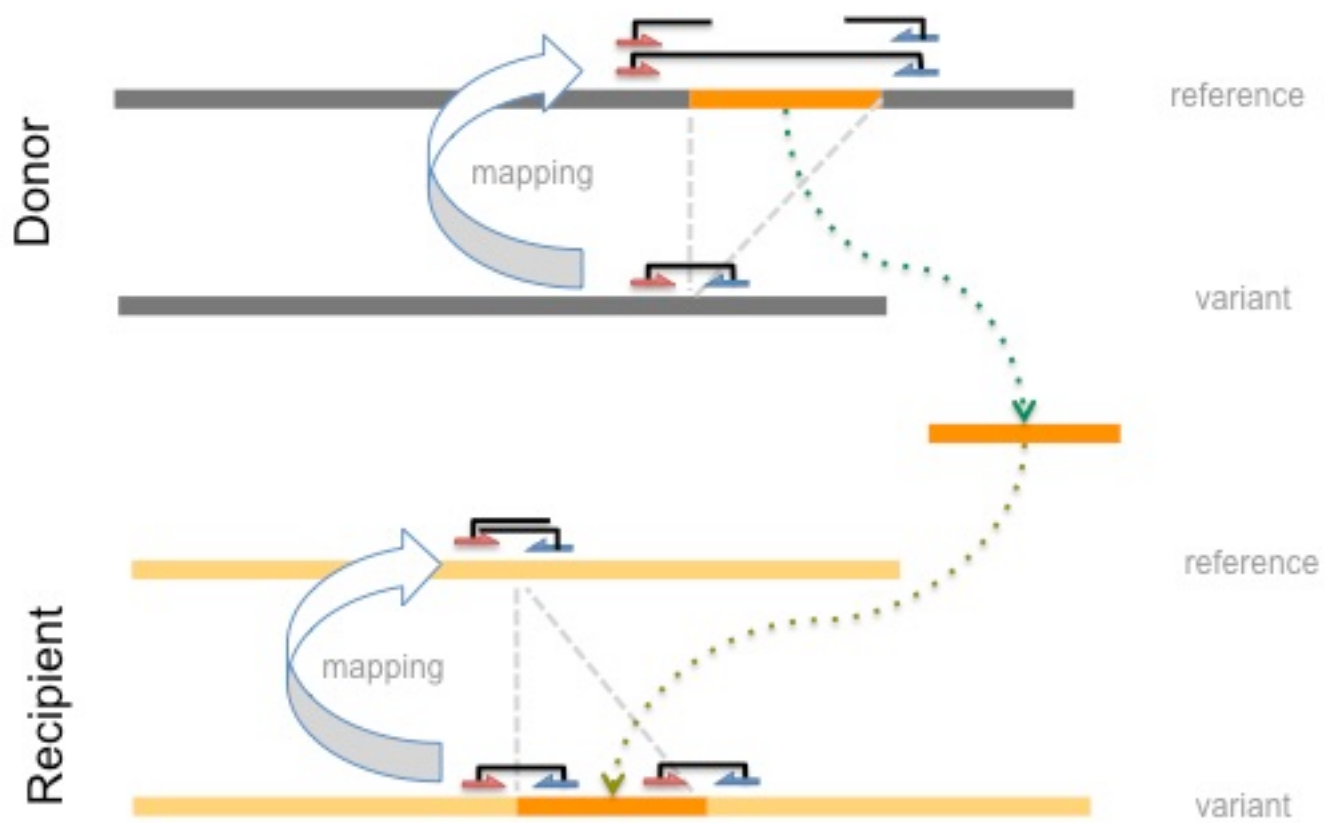

Supplement: supp_gkw481_nar-00967-met-n-2016-File006.pdf [file supp_gkw481_nar-00967-met-n-2016-File006.pdf]

## Germ-line Sample Analysis

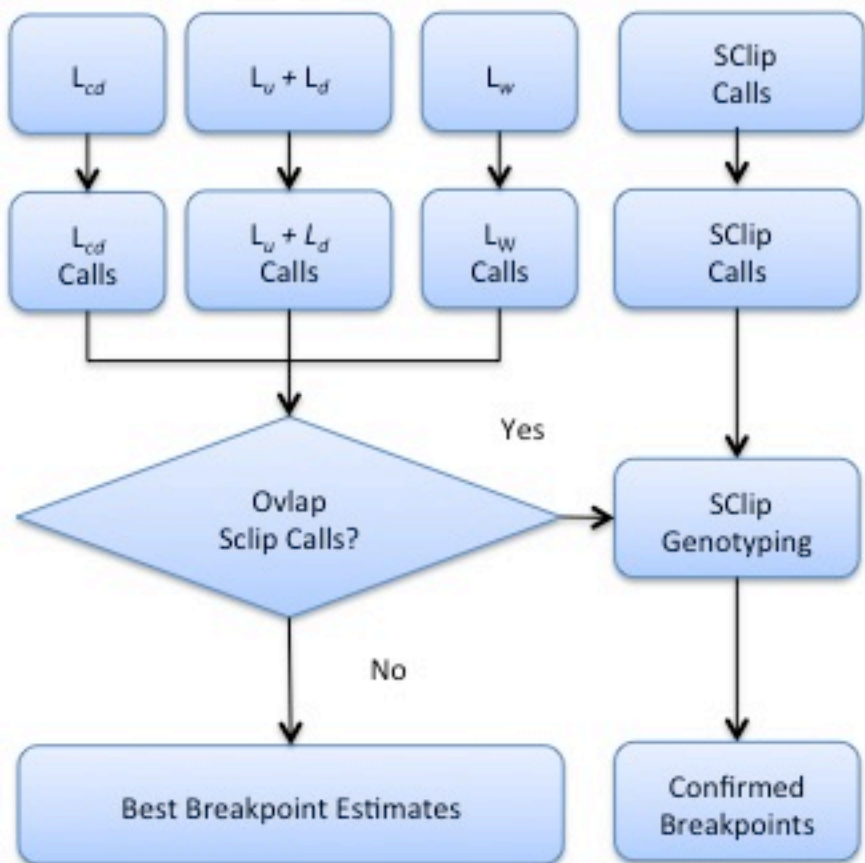

## Paired Case-Control Samples Analysis

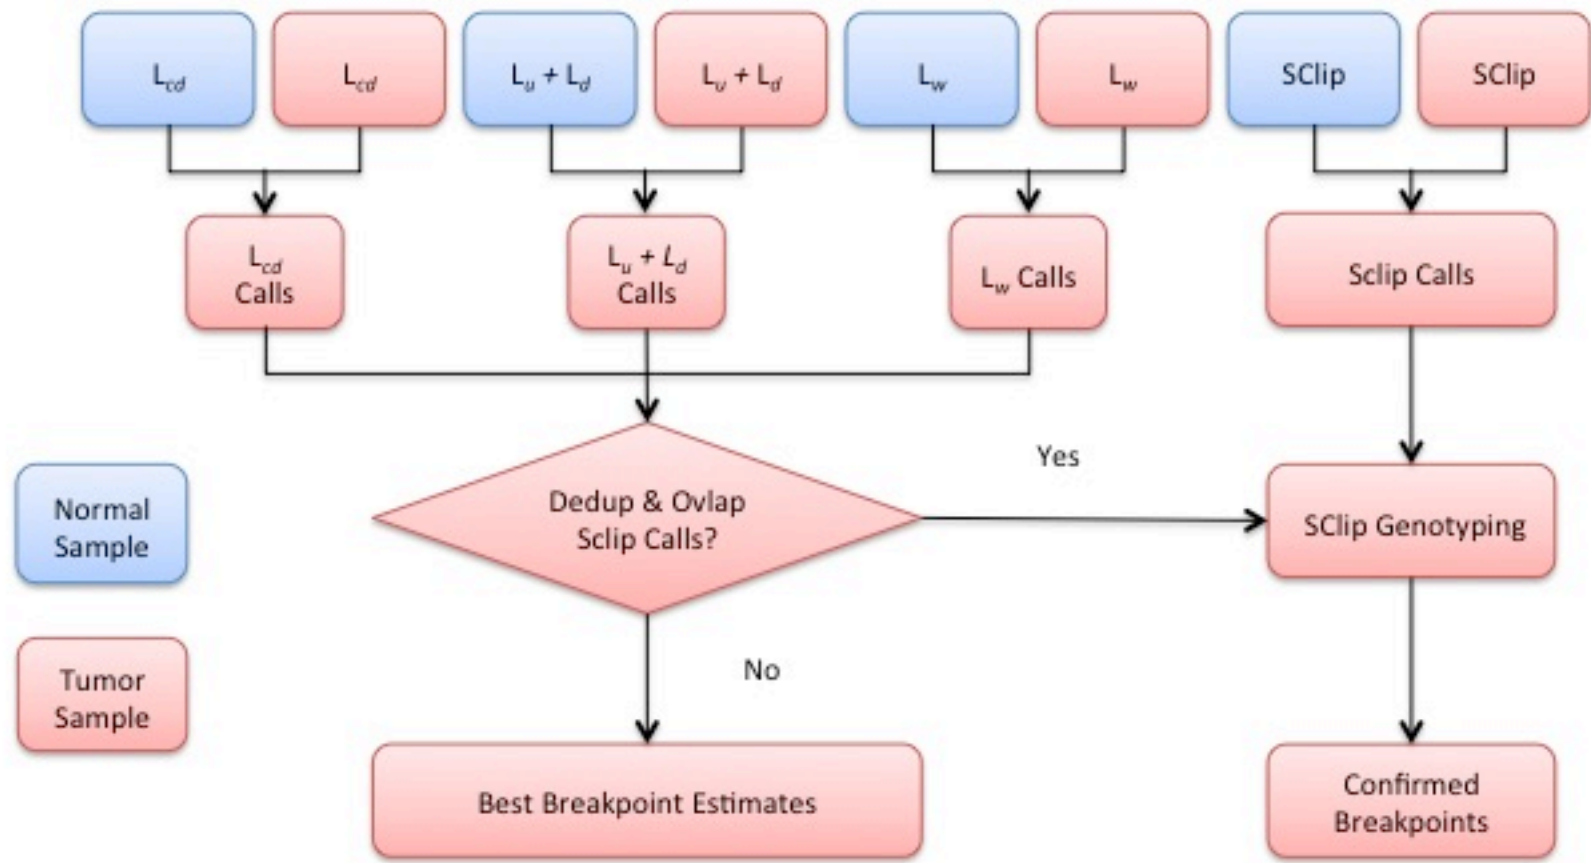

Supplement: supp_gkw481_nar-00967-met-n-2016-File007.pdf [file supp_gkw481_nar-00967-met-n-2016-File007.pdf]
